# Supplementary material for: Controllable methylenation with ethylene glycol as the methylene source: bridging enaminones and synthesis of tetrahydropyrimidines
Source: Royal Society of Chemistry journal article supplement (doi:10.1039/d2qo01187e), 2022-01-01
Supplement: d2qo01187e1.pdf [file d2qo01187e1.pdf]

## Supporting Information

### Controllable Methylenation with Ethylene Glycol as Methylene

### Source: Bridging Enaminones and Synthesis of Tetrahydropyrimidines

Yulei Zhao,<sup>\*‡</sup> Huimin Wang,<sup>‡</sup> Xin Kang, Ruihua Zhang, Nan Feng, and Qi Su

Shandong Key Laboratory of Life-Organic Analysis, Key Laboratory of Pharmaceutical Intermediates and Analysis of Natural Medicine, School of Chemistry and Chemical Engineering, Qufu Normal University, Qufu 273165, China.

Corresponding Author: Yulei Zhao

E-mail: ylzha@qfnu.edu.cn

<sup>‡</sup> These authors contributed equally to this work.

| <b>Contents:</b>                                  | <b>Page</b> |
|---------------------------------------------------|-------------|
| General Information                               | S3          |
| Synthesis and characterization of <b>2</b>        | S4-S15      |
| Synthesis and characterization of <b>3</b>        | S16-S21     |
| Synthesis and characterization of <b>2'</b>       | S22-S23     |
| Gram-Scale Preparation of <b>2a</b> and <b>3a</b> | S24         |
| References                                        | S25         |
| NMR spectra of compounds                          | S26-S57     |
| Cross reaction result                             | S58         |

## General Information

All glassware was oven dried at 100 °C for hours and cooled down under vacuum. Anhydrous DMF was prepared by distillation from CaH<sub>2</sub>. Unless otherwise noted, materials were obtained from commercial suppliers and used without further purification. The thin layer chromatography (TLC) employed glass 0.25 mm silica gel plates. Purification of reaction products was carried out by flash chromatography on silica gel (200~300 mesh). <sup>1</sup>H NMR spectra were recorded at 500 or 400 MHz, <sup>13</sup>C NMR spectra were recorded at 125 or 100 MHz, and in CDCl<sub>3</sub> (containing 0.03% TMS) solutions with Bruker Advance III spectrometers. <sup>1</sup>H NMR spectra were recorded with Me<sub>4</sub>Si (δ = 0.00) or CDCl<sub>3</sub> (δ = 7.26) as the internal reference and <sup>13</sup>C NMR spectra were recorded with CDCl<sub>3</sub> (δ = 77.16) as the internal reference. High-resolution mass spectra were obtained using a Bruker Maxis Impact mass spectrometer with a TOF (for ESI) analyzer. The enaminones **1** were prepared according to the literature methods.<sup>1-9</sup>

## Synthesis and characterization of 2

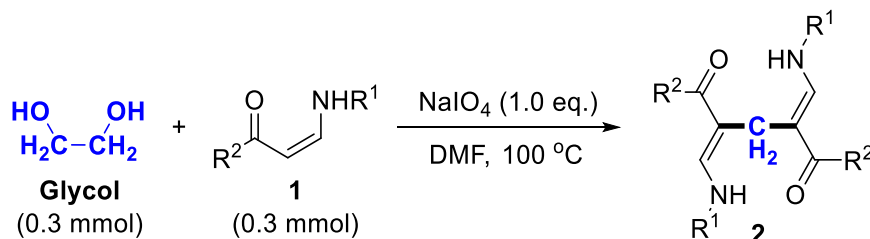

In an oven-dried Schlenk tube (25 mL) containing a magnetic stirring bar was added **1** (0.3 mmol), NaIO<sub>4</sub> (64.8 mg, 0.3 mmol). Then, the vessel was evacuated and refilled with Ar for three times. Under a stream of Ar, to this vessel were added DMF (1.5 mL) and ethylene glycol (16.8  $\mu$ L, 0.3 mmol). Then the vessel was stirred in a 100 °C oil bath for the corresponding time (see Table 2). The reaction could be monitored by TLC analysis. Finally, H<sub>2</sub>O (7 mL) was added to reaction system, and the resulting mixture was directly filtered and washed with H<sub>2</sub>O (5 mL  $\times$  6) to give pure products **2**.

**NOTE:** Products **2b**, **2f**, **2i**, **2m**, **2q**, are new compounds. Other products **2** are known compounds,<sup>10</sup> and the spectroscopic data are in agreement with that previously reported.

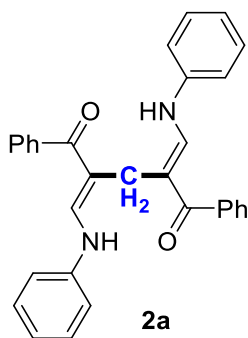

(2E,4E)-1,5-Diphenyl-2,4-bis((phenylamino)methylene)pentane-1,5-dione (**2a**).<sup>10</sup>

Compound **2a** was prepared in 92% yield (63 mg) according to the general procedure.  $R_f$  = 0.2 (petroleum ether/ethyl acetate = 15/1); Yellow solid; mp 194-196 °C; <sup>1</sup>H NMR (500 MHz, CDCl<sub>3</sub>):  $\delta$  10.89 (d,  $J$  = 13.3 Hz, 2H), 7.78 (d,  $J$  = 13.3 Hz, 2H), 7.60-7.58 (m, 4H), 7.52-7.45 (m, 6H), 7.30-7.27 (m, 4H), 7.07-7.01 (m, 6H), 3.84 (s,

2H);  $^{13}\text{C}$  NMR (125 MHz,  $\text{CDCl}_3$ ):  $\delta$  197.5, 149.3, 140.8, 140.5, 130.3, 129.8, 128.9, 128.3, 123.3, 116.2, 113.8, 20.4; Analytical data for **2a** were consistent with our previous reports.<sup>10</sup>

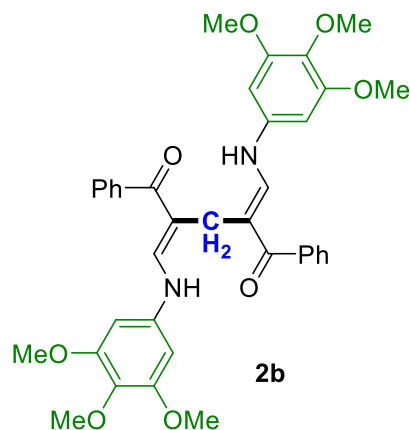

(*2E,4E*)-1,5-Diphenyl-2,4-bis(((3,4,5-trimethoxyphenyl)amino)methylene)pentane-1,5-dione (**2b**). Compound **2b** was prepared in 97% yield (93 mg) according to the general procedure.  $R_f = 0.2$  (petroleum ether/ethyl acetate = 4/1); Yellow solid; mp 213-215 °C;  $^1\text{H}$  NMR (500 MHz,  $\text{CDCl}_3$ ):  $\delta$  10.79 (d,  $J = 13.2$  Hz, 2H), 7.65 (d,  $J = 13.2$  Hz, 2H), 7.58 (d,  $J = 7.1$  Hz, 4H), 7.49-7.42 (m, 8H), 6.25 (s, 2H), 3.81 (s, 12H), 3.79 (s, 8H);  $^{13}\text{C}$  NMR (125 MHz,  $\text{CDCl}_3$ ):  $\delta$  197.3, 154.2, 149.7, 140.4, 137.3, 134.5, 130.5, 129.0, 128.2, 113.7, 94.0, 61.2, 56.3, 20.4; HRMS (ESI)  $m/z$ :  $[\text{M}+\text{H}]^+$  Calcd for  $\text{C}_{37}\text{H}_{39}\text{N}_2\text{O}_8$  639.2701, Found 639.2698.

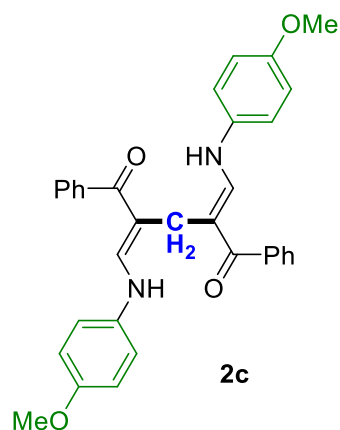

(*2E,4E*)-2,4-Bis(((4-methoxyphenyl)amino)methylene)-1,5-diphenylpentane-1,5-dione (**2c**).<sup>10</sup> Compound **2c** was prepared in 92% yield (72 mg) according to the general

procedure.  $R_f = 0.2$  (petroleum ether/ethyl acetate = 10/1); Yellow solid; mp 180-182 °C;  $^1\text{H NMR}$  (500 MHz,  $\text{CDCl}_3$ ):  $\delta$  10.89 (d,  $J = 13.4$  Hz, 2H), 7.68 (d,  $J = 13.4$  Hz, 2H), 7.56 (d,  $J = 7.0$  Hz, 4H), 7.48-7.43 (m, 6H), 7.00 (d,  $J = 8.7$  Hz, 4H), 6.83 (d,  $J = 8.7$  Hz, 4H), 3.81 (s, 2H), 3.76 (s, 6H);  $^{13}\text{C NMR}$  (125 MHz,  $\text{CDCl}_3$ ):  $\delta$  196.8, 156.1, 150.1, 140.7, 134.5, 130.1, 128.8, 128.3, 117.5, 115.0, 113.1, 55.7, 20.4; Analytical data for **2c** were consistent with our previous reports.<sup>10</sup>

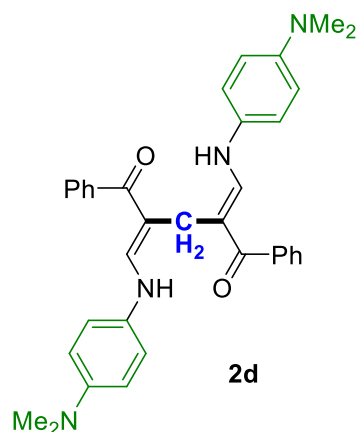

(2*E*,4*E*)-2,4-Bis(((4-(dimethylamino)phenyl)amino)methylene)-1,5-diphenylpentane-1,5-dione (**2d**).<sup>10</sup> Compound **2d** was prepared in 90% yield (74 mg) according to the general procedure.  $R_f = 0.2$  (petroleum ether/ethyl acetate = 12/1); Yellow solid; mp 220-222 °C;  $^1\text{H NMR}$  (500 MHz,  $\text{CDCl}_3$ ):  $\delta$  10.85 (d,  $J = 13.5$  Hz, 2H), 7.67 (d,  $J = 13.6$  Hz, 2H), 7.55 (d,  $J = 6.4$  Hz, 4H), 7.45-7.42 (m, 6H), 6.97 (d,  $J = 9.0$  Hz, 4H), 6.67 (d,  $J = 9.0$  Hz, 4H), 3.81 (s, 2H), 2.89 (s, 12H);  $^{13}\text{C NMR}$  (125 MHz,  $\text{CDCl}_3$ ):  $\delta$  196.2, 150.1, 147.6, 141.0, 131.5, 129.8, 128.8, 128.2, 117.6, 114.0, 112.7, 41.1, 20.3; Analytical data for **2d** were consistent with our previous reports.<sup>10</sup>

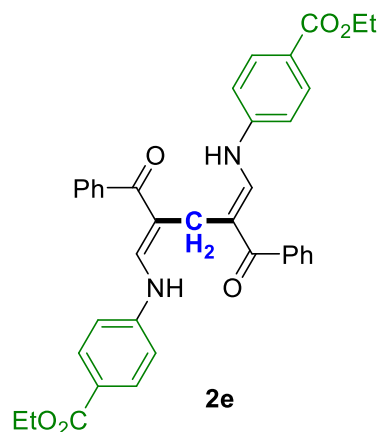

Diethyl 4,4'-(((1E,4E)-2,4-dibenzoylpenta-1,4-diene-1,5-diyl)bis(azanediyl))dibenzoate (**2e**).<sup>10</sup> Compound **2e** was prepared in 99% yield (89 mg) according to the general procedure.  $R_f = 0.2$  (petroleum ether/ethyl acetate = 10/1); White solid; mp 218-220 °C; <sup>1</sup>H NMR (500 MHz, CDCl<sub>3</sub>): δ 11.03 (d,  $J = 13.0$  Hz, 2H), 7.97 (d,  $J = 8.6$  Hz, 4H), 7.78 (d,  $J = 13.0$  Hz, 2H), 7.60 (d,  $J = 7.1$  Hz, 4H), 7.56-7.53 (m, 2H), 7.50-7.47 (m, 4H), 7.06 (d,  $J = 8.6$  Hz, 4H), 4.34 (q,  $J = 7.1$  Hz, 4H), 3.82 (s, 2H), 1.37 (t,  $J = 7.1$  Hz, 6H); <sup>13</sup>C NMR (125 MHz, CDCl<sub>3</sub>): δ 198.3, 166.2, 148.1, 144.5, 139.9, 131.6, 130.9, 128.9, 128.5, 125.0, 115.3, 115.1, 60.9, 20.7, 14.5; Analytical data for **2e** were consistent with our previous reports.<sup>10</sup>

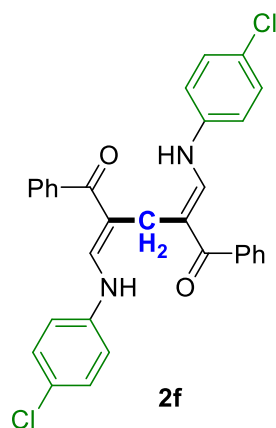

(2E,4E)-2,4-Bis(((4-chlorophenyl)amino)methylene)-1,5-diphenylpentane-1,5-dione (**2f**). Compound **2f** was prepared in 96% yield (76 mg) according to the general procedure.  $R_f = 0.2$  (petroleum ether/ethyl acetate = 12/1); Yellow solid; mp 247-249 °C; <sup>1</sup>H NMR (500 MHz, CDCl<sub>3</sub>): δ 10.94 (d,  $J = 13.0$  Hz, 2H), 7.68 (d,  $J = 13.1$  Hz, 2H), 7.56 (d,  $J = 7.0$  Hz, 4H), 7.53-7.51(m, 2H), 7.48-7.45(m, 4H), 7.23 (d,  $J = 8.3$  Hz, 4H), 6.97 (d,  $J = 8.3$  Hz, 4H), 3.79 (s, 2H); <sup>13</sup>C NMR (125 MHz, CDCl<sub>3</sub>): δ 197.8, 149.0, 140.2, 139.5, 130.6, 129.8, 128.9, 128.4, 128.3, 117.3, 114.2, 20.6; HRMS (ESI) m/z: [M+H]<sup>+</sup> Calcd for C<sub>31</sub>H<sub>25</sub>Cl<sub>2</sub>N<sub>2</sub>O<sub>2</sub> 527.1288, Found 527.1283.

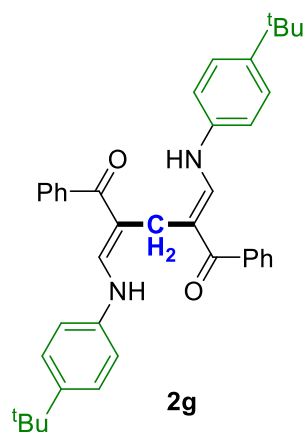

(2E,4E)-2,4-Bis(((4-(tert-butyl)phenyl)amino)methylene)-1,5-diphenylpentane-1,5-dione (**2g**).<sup>10</sup> Compound **2g** was prepared in 94% yield (80 mg) according to the general procedure.  $R_f = 0.2$  (petroleum ether/ethyl acetate = 15/1); Yellow solid; mp 205-207 °C; <sup>1</sup>H NMR (500 MHz, CDCl<sub>3</sub>): δ 10.84 (d,  $J = 13.4$  Hz, 2H), 7.75 (d,  $J = 13.4$  Hz, 2H), 7.57 (d,  $J = 6.9$  Hz, 4H), 7.51-7.43 (m, 6H), 7.31 (d,  $J = 8.6$  Hz, 4H), 7.00 (d,  $J = 8.6$  Hz, 4H), 3.83 (s, 2H), 1.29 (s, 18H); <sup>13</sup>C NMR (125 MHz, CDCl<sub>3</sub>): δ 197.2, 149.6, 146.4, 140.6, 138.4, 130.2, 128.9, 128.3, 126.6, 115.9, 113.5, 34.4, 31.5, 20.3; Analytical data for **2g** were consistent with our previous reports.<sup>10</sup>

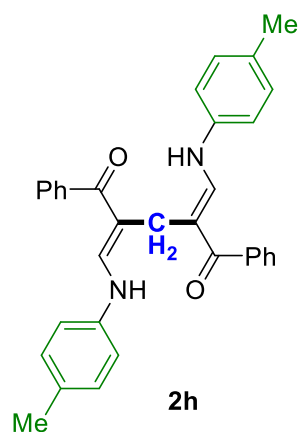

(2E,4E)-1,5-Diphenyl-2,4-bis((p-tolylamino)methylene)pentane-1,5-dione (**2h**).<sup>10</sup> Compound **2h** was prepared in 98% yield (72 mg) according to the general procedure.  $R_f = 0.2$  (petroleum ether/ethyl acetate = 15/1); Yellow solid; mp 188-190 °C; <sup>1</sup>H NMR (500 MHz, CDCl<sub>3</sub>): δ 10.86 (d,  $J = 13.3$  Hz, 2H), 7.74 (d,  $J = 13.4$  Hz, 2H), 7.57 (d,  $J = 6.9$  Hz, 4H), 7.51-7.44 (m, 6H), 7.08 (d,  $J = 8.1$  Hz, 4H), 6.96 (d,  $J = 8.2$  Hz, 4H), 3.83 (s, 2H), 2.29 (s, 6H); <sup>13</sup>C NMR (125 MHz, CDCl<sub>3</sub>): δ 197.1, 149.6,



140.6, 138.5, 133.0, 130.2, 130.2, 128.8, 128.3, 116.2, 113.4, 20.9, 20.4; Analytical data for **2h** were consistent with our previous reports.<sup>10</sup>

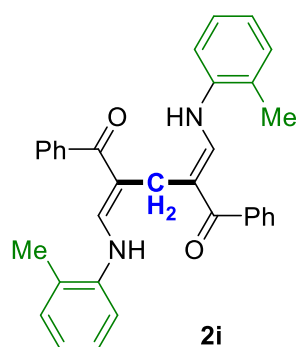

*(2E,4E)-1,5-Diphenyl-2,4-bis((o-tolylamino)methylene)pentane-1,5-dione* (**2i**).

Compound **2i** was prepared in 92% yield (67 mg) according to the general procedure.  $R_f = 0.2$  (petroleum ether/ethyl acetate = 15/1); White solid; mp 156-158 °C;  $^1\text{H}$  NMR (500 MHz,  $\text{CDCl}_3$ ):  $\delta$  10.13 (d,  $J = 12.9$  Hz, 2H), 7.68 (d,  $J = 13.0$  Hz, 2H), 7.55 (d,  $J = 6.7$  Hz, 4H), 7.47-7.40 (m, 6H), 7.19 (d,  $J = 7.3$  Hz, 2H), 7.12-7.10 (m, 2H), 7.01-6.98 (m, 2H), 6.81 (d,  $J = 8.0$  Hz, 2H), 3.89 (s, 2H), 2.58 (s, 6H);  $^{13}\text{C}$  NMR (125 MHz,  $\text{CDCl}_3$ ):  $\delta$  197.4, 151.8, 140.7, 140.2, 131.4, 130.1, 129.1, 128.8, 128.2, 127.0, 124.1, 117.4, 113.9, 20.2, 18.5; HRMS (ESI)  $m/z$ :  $[\text{M}+\text{H}]^+$  Calcd for  $\text{C}_{33}\text{H}_{31}\text{N}_2\text{O}_2$  487.2380, Found 487.2377.

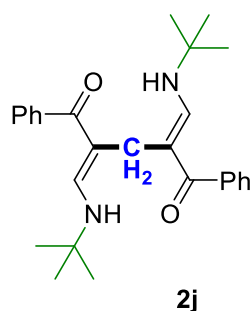

*(2E,4E)-2,4-Bis((tert-butylamino)methylene)-1,5-diphenylpentane-1,5-dione* (**2j**).<sup>10</sup>

Compound **2j** was prepared in 93% yield (58 mg) according to the general procedure.  $R_f = 0.2$  (petroleum ether/ethyl acetate = 12/1); Yellow solid; mp 122-124 °C;  $^1\text{H}$  NMR (400 MHz,  $\text{CDCl}_3$ ):  $\delta$  8.94 (d,  $J = 14.2$  Hz, 2H), 7.41-7.35 (m, 10H), 7.27 (d,  $J = 14.4$ , 2H), 3.54 (s, 2H), 1.23 (s, 18H);  $^{13}\text{C}$  NMR (100 MHz,  $\text{CDCl}_3$ ):  $\delta$  194.3, 154.1,

141.7, 129.1, 128.3, 128.0, 110.1, 52.7, 29.9, 19.1; Analytical data for **2j** were consistent with our previous reports.<sup>10</sup>

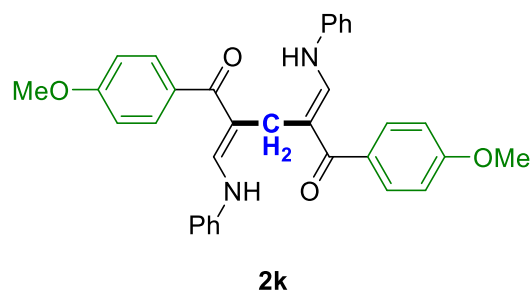

*(2E,4E)-1,5-Bis(4-methoxyphenyl)-2,4-bis((phenylamino)methylene)pentane-1,5-dione (2k)*.<sup>10</sup> Compound **2k** was prepared in 94% yield (73 mg) according to the general procedure.  $R_f = 0.2$  (petroleum ether/ethyl acetate = 9/1); Yellow solid; mp 189-191 °C; <sup>1</sup>H NMR (500 MHz, CDCl<sub>3</sub>): δ 10.91 (d,  $J = 13.2$  Hz, 2H), 7.78 (d,  $J = 13.3$  Hz, 2H), 7.60 (d,  $J = 8.7$  Hz, 4H), 7.31-7.27 (m, 4H), 7.07 (d,  $J = 7.8$  Hz, 4H), 7.02-6.99 (m, 2H), 6.97 (d,  $J = 8.7$  Hz, 4H), 3.89 (s, 6H), 3.80 (s, 2H); <sup>13</sup>C NMR (125 MHz, CDCl<sub>3</sub>): δ 196.8, 161.6, 148.3, 141.1, 132.9, 131.1, 129.7, 123.0, 116.0, 113.6, 55.5, 21.2; Analytical data for **2k** were consistent with our previous reports.<sup>10</sup>

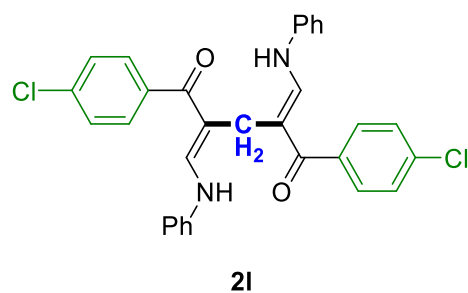

*(2E,4E)-1,5-Bis(4-chlorophenyl)-2,4-bis((phenylamino)methylene)pentane-1,5-dione (2l)*.<sup>10</sup> Compound **2l** was prepared in 95% yield (75 mg) according to the general procedure.  $R_f = 0.2$  (petroleum ether/ethyl acetate = 10/1); Yellow solid; mp 236-238 °C; <sup>1</sup>H NMR (500 MHz, CDCl<sub>3</sub>): δ 10.86 (d,  $J = 13.3$  Hz, 2H), 7.71 (d,  $J = 13.3$  Hz, 2H), 7.52 (d,  $J = 8.3$  Hz, 4H), 7.44 (d,  $J = 8.3$  Hz, 4H), 7.32-7.29 (m, 4H), 7.05-7.04 (m, 6H), 3.79 (s, 2H); <sup>13</sup>C NMR (125 MHz, CDCl<sub>3</sub>): δ 196.1, 149.2, 140.6, 138.8,

136.6, 130.3, 129.9, 128.7, 123.7, 116.2, 113.6, 20.6; Analytical data for **2l** were consistent with our previous reports.<sup>10</sup>

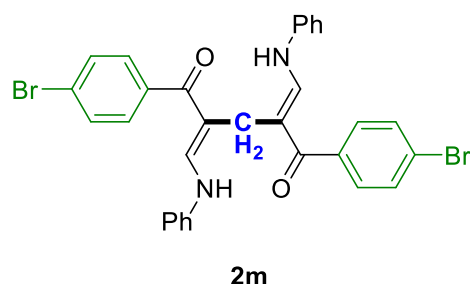

*(2E,4E)-1,5-Bis(4-bromophenyl)-2,4-bis((phenylamino)methylene)pentane-1,5-dione (2m)*. Compound **2m** was prepared in 94% yield (87 mg) according to the general procedure.  $R_f = 0.2$  (petroleum ether/ethyl acetate = 5/1); Yellow solid; mp 262-263 °C; <sup>1</sup>H NMR (500 MHz, CDCl<sub>3</sub>): δ 10.87 (d,  $J = 13.3$  Hz, 2H), 7.72 (d,  $J = 13.4$  Hz, 2H), 7.60 (d,  $J = 8.3$  Hz, 4H), 7.46 (d,  $J = 8.3$  Hz, 4H), 7.33-7.29 (m, 4H), 7.06-7.04 (m, 6H), 3.79 (s, 2H); <sup>13</sup>C NMR (125 MHz, CDCl<sub>3</sub>): δ 196.1, 149.2, 140.6, 139.2, 131.6, 130.5, 129.9, 124.9, 123.7, 116.2, 113.5, 20.5; HRMS (ESI)  $m/z$ : [M+H]<sup>+</sup> Calcd for C<sub>31</sub>H<sub>25</sub>Br<sub>2</sub>N<sub>2</sub>O<sub>2</sub> 615.0277, Found 615.0273.

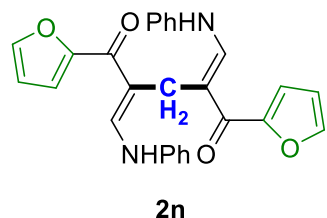

*(2E,4E)-1,5-Di(furan-2-yl)-2,4-bis((phenylamino)methylene)pentane-1,5-dione (2n)*.<sup>10</sup> Compound **2n** was prepared in 90% yield (59 mg) according to the general procedure.  $R_f = 0.2$  (petroleum ether/ethyl acetate = 10/1); Yellow solid; mp 168-170 °C; <sup>1</sup>H NMR (400 MHz, CDCl<sub>3</sub>): δ 10.93 (d,  $J = 13.2$  Hz, 2H), 8.55 (d,  $J = 13.3$  Hz, 2H), 7.63 (s, 2H), 7.36-7.32 (m, 4H), 7.21 (d,  $J = 7.8$  Hz, 4H), 7.10 (d,  $J = 3.3$  Hz, 2H), 7.07-7.04 (m, 2H), 6.56-6.54 (m, 2H), 3.77 (s, 2H); <sup>13</sup>C NMR (100 MHz, CDCl<sub>3</sub>): δ 181.8, 153.5, 147.3, 145.1, 141.0, 129.8, 123.4, 116.9, 116.4, 112.9, 111.7, 20.8; Analytical data for **2n** were consistent with our previous reports.<sup>10</sup>

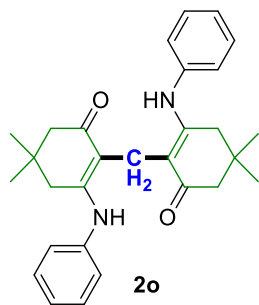

*2,2'-Methylenebis(5,5-dimethyl-3-(phenylamino)cyclohex-2-en-1-one)* (**2o**).<sup>10</sup>

Compound **2o** was prepared in 93% yield (62 mg) according to the general procedure.  $R_f = 0.2$  (petroleum ether/ethyl acetate = 5/1); White solid; mp 190-192 °C;  $^1\text{H}$  NMR (500 MHz,  $\text{CDCl}_3$ ):  $\delta$  10.81 (s, 2H), 7.37-7.33 (m, 4H), 7.18-7.14 (m, 6H), 3.55 (s, 2H), 2.50-2.30 (m, 8H), 1.00 (s, 12H);  $^{13}\text{C}$  NMR (125 MHz,  $\text{CDCl}_3$ ):  $\delta$  196.3, 162.0, 139.6, 129.2, 125.0, 124.5, 110.3, 50.1, 41.0, 32.8, 28.8, 18.1; Analytical data for **2o** were consistent with our previous reports.<sup>10</sup>

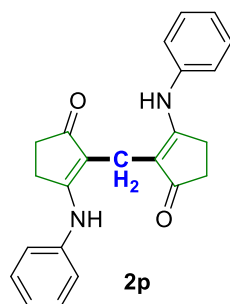

*2,2'-Methylenebis(3-(phenylamino)cyclopent-2-en-1-one)* (**2p**).<sup>10</sup> Compound **2p** was prepared in 93% yield (50 mg) according to the general procedure.  $R_f = 0.2$  (petroleum ether/ethyl acetate = 4/1); Yellow solid; mp 196-198 °C;  $^1\text{H}$  NMR (500 MHz,  $\text{CDCl}_3$ ):  $\delta$  9.51 (s, 2H), 7.35-7.32 (m, 4H), 7.24-7.22 (m, 4H), 7.12-7.10 (m, 2H), 3.15 (s, 2H), 2.84 (s, br, 4H), 2.49 (t,  $J = 4.8$  Hz, 4H);  $^{13}\text{C}$  NMR (125 MHz,  $\text{CDCl}_3$ ):  $\delta$  203.4, 172.1, 139.8, 129.4, 124.3, 121.0, 116.2, 33.4, 26.6, 14.6; Analytical data for **2p** were consistent with our previous reports.<sup>10</sup>

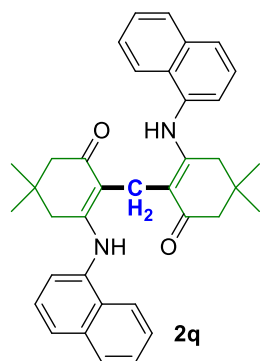

*2,2'-Methylenebis(5,5-dimethyl-3-(naphthalen-1-ylamino)cyclohex-2-en-1-one)* (**2q**). Compound **2q** was prepared in 93% yield (76 mg) according to the general procedure.  $R_f = 0.2$  (petroleum ether/ethyl acetate = 10/1); White solid; mp 275-277 °C;  $^1\text{H NMR}$  (500 MHz,  $\text{CDCl}_3$ ):  $\delta$  10.80 (s, 2H), 7.94-7.89 (m, 4H), 7.82 (d,  $J = 8.2$  Hz, 2H), 7.54-7.53 (m, 4H), 7.50-7.47 (m, 2H), 7.29 (d,  $J = 7.2$  Hz, 2H), 3.86 (s, 2H), 2.26-2.17 (m, 8H), 0.96 (s, 12H);  $^{13}\text{C NMR}$  (125 MHz,  $\text{CDCl}_3$ ):  $\delta$  196.0, 164.4, 135.7, 134.6, 131.3, 128.4, 127.5, 126.8, 126.6, 125.6, 125.0, 123.2, 109.4, 50.0, 40.5, 32.5, 28.2, 18.1; HRMS (ESI)  $m/z$ :  $[\text{M}+\text{H}]^+$  Calcd for  $\text{C}_{37}\text{H}_{39}\text{N}_2\text{O}_2$  543.3006, Found 543.3004.

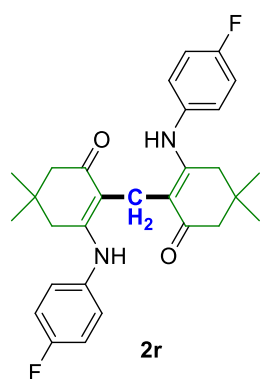

*2,2'-Methylenebis(3-((4-fluorophenyl)amino)-5,5-dimethylcyclohex-2-en-1-one)* (**2r**).<sup>10</sup> Compound **2r** was prepared in 93% yield (67 mg) according to the general procedure.  $R_f = 0.2$  (petroleum ether/ethyl acetate = 5/1); White solid; mp 235-237 °C;  $^1\text{H NMR}$  (500 MHz,  $\text{CDCl}_3$ ):  $\delta$  10.75 (s, 2H), 7.11-7.08 (m, 4H), 7.07-7.03 (m, 4H), 3.51 (s, 2H), 2.42-2.28 (m, 8H), 0.99 (s, 12H);  $^{13}\text{C NMR}$  (125 MHz,  $\text{CDCl}_3$ ):  $\delta$  196.4, 162.2, 160.4 (d,  $J_{\text{C-F}} = 243.4$  Hz), 135.6 (d,  $J_{\text{C-F}} = 2.9$  Hz), 126.5 (d,  $J_{\text{C-F}} = 8.2$  Hz),

116.1 (d,  $J_{C-F} = 22.5$  Hz), 110.0, 50.0, 40.9, 32.8, 28.4, 18.1; Analytical data for **2r** were consistent with our previous reports.<sup>10</sup>

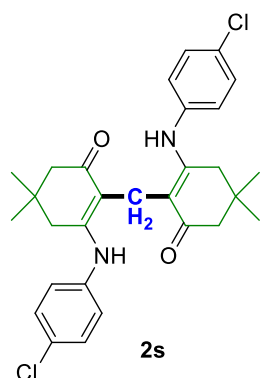

*2,2'-Methylenebis(3-((4-chlorophenyl)amino)-5,5-dimethylcyclohex-2-en-1-one)* (**2s**).<sup>10</sup> Compound **2s** was prepared in 95% yield (73 mg) according to the general procedure.  $R_f = 0.2$  (petroleum ether/ethyl acetate = 5/1); Yellow solid; mp 237-239 °C; <sup>1</sup>H NMR (500 MHz, CDCl<sub>3</sub>): δ 10.86 (s, 2H), 7.31 (d,  $J = 8.6$  Hz, 4H), 7.08 (d,  $J = 8.6$  Hz, 4H), 3.49 (s, 2H), 2.51-2.29 (m, 8H), 1.00-0.97 (m, 12H); <sup>13</sup>C NMR (125 MHz, CDCl<sub>3</sub>): δ 196.8, 161.6, 138.3, 130.3, 129.3, 125.5, 110.8, 50.1, 41.0, 32.9, 29.1, 27.4, 18.3; Analytical data for **2s** were consistent with our previous reports.<sup>10</sup>

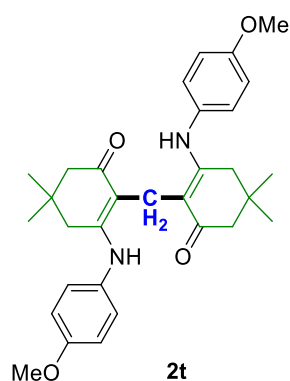

*2,2'-Methylenebis(3-((4-methoxyphenyl)amino)-5,5-dimethylcyclohex-2-en-1-one)* (**2t**).<sup>10</sup> Compound **2t** was prepared in 93% yield (70 mg) according to the general procedure.  $R_f = 0.2$  (petroleum ether/ethyl acetate = 4/1); White solid; mp 178-180 °C; <sup>1</sup>H NMR (500 MHz, CDCl<sub>3</sub>): δ 10.58 (s, 2H), 7.04 (d,  $J = 8.1$  Hz, 4H), 6.87 (d,  $J = 7.9$  Hz, 4H), 3.81 (s, 6H), 3.53 (s, 2H), 2.26 (s, br, 8H), 0.98 (s, 12H); <sup>13</sup>C NMR (125

MHz, CDCl<sub>3</sub>): δ 195.7, 162.7, 157.5, 132.5, 126.5, 114.4, 109.2, 55.6, 50.0, 40.8, 32.6, 28.4, 17.8; Analytical data for **2t** were consistent with our previous reports.<sup>10</sup>

### Synthesis and characterization of 3

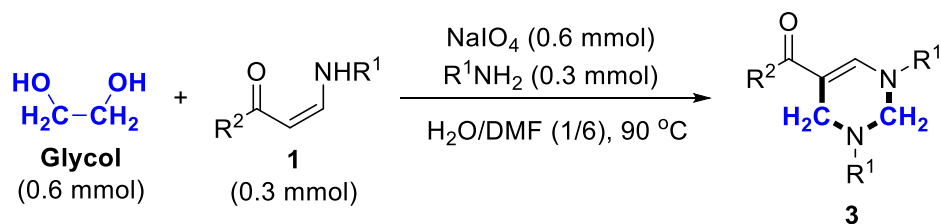

In an oven-dried Schlenk tube (25 mL) containing a magnetic stirring bar was added **1** (0.3 mmol), NaIO<sub>4</sub> (129.5 mg, 0.6 mmol), H<sub>2</sub>O/DMF (3.5 mL, v/v = 1/6) and ethylene glycol (33.5 μL, 0.6 mmol), R<sup>1</sup>NH<sub>2</sub> (0.3 mmol). Then the vessel was stirred in a 90 °C oil bath for the corresponding time (see Table 3). The reaction could be monitored by TLC analysis.

For **3a**, **3c-3e**, H<sub>2</sub>O (7 mL) was added to reaction system, and the resulting mixture was directly filtered and washed with H<sub>2</sub>O (5 mL × 6) to give pure products.

For **3b**, **3f-3k**, the resulting mixture was brine (20 mL), and extracted with ethyl acetate (30 mL). The organic layers were washed with brine, dried over anhydrous Na<sub>2</sub>SO<sub>4</sub>, filtered, concentrated under reduced pressure and subjected to column chromatography for purification directly, using petroleum ether/ethyl acetate (3:1–7:1) as the eluent.

**NOTE:** Products **3d-3f**, **3i**, are new compounds. Other products **3** are known compounds,<sup>11</sup> and the spectroscopic data are in agreement with that previously reported.

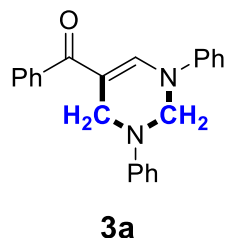

(1,3-Diphenyl-1,2,3,4-tetrahydropyrimidin-5-yl)(phenyl)methanone (**3a**).<sup>11</sup> Compound **3a** was prepared in 95% yield (97 mg) according to the general procedure. *R<sub>f</sub>* = 0.2



(petroleum ether/ethyl acetate = 4/1); Yellow solid; mp 134-137 °C; <sup>1</sup>H NMR (500 MHz, CDCl<sub>3</sub>): δ 7.56-7.52 (m, 3H), 7.46-7.43 (m, 1H), 7.42-7.38 (m, 2H), 7.36-7.33 (m, 2H), 7.25-7.23 (m, 2H), 7.15-7.12 (m, 1H), 7.00 (d, *J* = 7.9 Hz, 2H), 6.95-6.90 (m, 3H), 5.16 (s, 2H), 4.51 (s, 2H); <sup>13</sup>C NMR (125 MHz, CDCl<sub>3</sub>): δ 193.5, 148.6, 146.1, 144.0, 139.7, 130.4, 129.9, 129.4, 128.5, 128.3, 124.6, 121.3, 118.7, 117.9, 110.9, 65.6, 47.2; Analytical data for **3a** were consistent with our previous reports.<sup>11</sup>

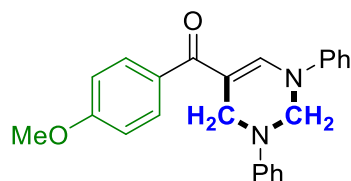

**3b**

*(1,3-Diphenyl-1,2,3,4-tetrahydropyrimidin-5-yl)(4-methoxyphenyl)methanone (3b)*.<sup>11</sup>

Compound **3b** was prepared in 86% yield (96 mg) according to the general procedure. *R<sub>f</sub>* = 0.2 (petroleum ether/ethyl acetate = 5/1); Yellow solid; mp 119-121 °C; <sup>1</sup>H NMR (400 MHz, CDCl<sub>3</sub>): δ 7.58-7.54 (m, 3H), 7.36-7.32 (m, 2H), 7.25-7.21 (m, 2H), 7.15-7.11 (m, 1H), 6.99 (d, *J* = 8.0 Hz, 2H), 6.95 (d, *J* = 7.8 Hz, 2H), 6.92-6.88 (m, 3H), 5.16 (s, 2H), 4.50 (s, 2H), 3.84 (s, 3H); <sup>13</sup>C NMR (100 MHz, CDCl<sub>3</sub>): δ 192.6, 161.6, 148.6, 145.2, 144.2, 132.2, 130.6, 129.9, 129.4, 124.4, 121.2, 118.5, 118.0, 113.6, 111.1, 65.5, 55.5, 47.4; Analytical data for **3b** were consistent with our previous reports.<sup>11</sup>

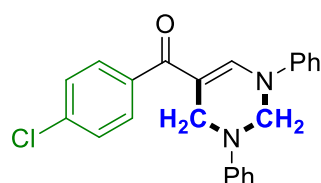

**3c**

*(4-Chlorophenyl)(1,3-diphenyl-1,2,3,4-tetrahydropyrimidin-5-yl)methanone (3c)*.<sup>11</sup>

Compound **3c** was prepared in 83% yield (93mg) according to the general procedure. *R<sub>f</sub>* = 0.2 (petroleum ether/ethyl acetate = 10/1); Yellow solid; mp 138-141 °C; <sup>1</sup>H NMR (500 MHz, CDCl<sub>3</sub>): δ 7.50-7.47 (m, 3H), 7.38-7.34 (m, 4H), 7.23 (d, *J* = 8.5 Hz, 2H), 7.17-7.14 (m, 1H), 6.99-6.90 (m, 5H), 5.16 (s, 2H), 4.49 (s, 2H); <sup>13</sup>C NMR (125

MHz, CDCl<sub>3</sub>):  $\delta$  192.0, 148.5, 146.0, 144.0, 138.0, 136.5, 130.0, 130.0, 129.5, 128.6, 124.9, 121.4, 118.8, 117.9, 110.8, 65.7, 47.1; Analytical data for **3c** were consistent with our previous reports.<sup>11</sup>

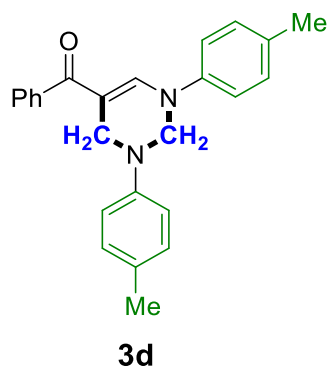

(1,3-Di-*p*-tolyl-1,2,3,4-tetrahydropyrimidin-5-yl)(phenyl)methanone (**3d**). Compound **3d** was prepared in 92% yield (102 mg) according to the general procedure.  $R_f$  = 0.2 (petroleum ether/ethyl acetate = 10/1); Yellow solid; mp 139-141 °C; <sup>1</sup>H NMR (500 MHz, CDCl<sub>3</sub>):  $\delta$  7.54-7.53 (m, 2H), 7.47-7.37 (m, 4H), 7.13 (d,  $J$  = 8.4 Hz, 2H), 7.04 (d,  $J$  = 8.5 Hz, 2H), 6.90 (d,  $J$  = 8.5 Hz, 2H), 6.83 (d,  $J$  = 8.4 Hz, 2H), 5.09 (s, 2H), 4.46 (s, 2H), 2.31 (s, 3H), 2.26 (s, 3H); <sup>13</sup>C NMR (125 MHz, CDCl<sub>3</sub>):  $\delta$  193.3, 146.4, 146.3, 141.8, 139.9, 134.5, 130.7, 130.4, 130.3, 129.9, 128.5, 128.2, 118.9, 118.1, 110.3, 66.2, 47.3, 20.8, 20.6; HRMS (ESI)  $m/z$ : [M+H]<sup>+</sup> Calcd for C<sub>25</sub>H<sub>25</sub>N<sub>2</sub>O 369.1961; found, 369.1958.

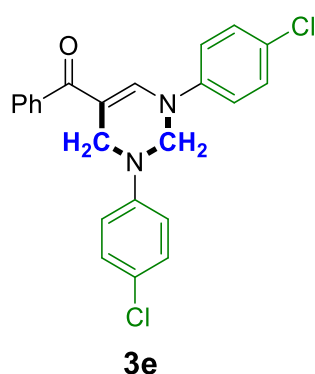

(1,3-Bis(4-chlorophenyl)-1,2,3,4-tetrahydropyrimidin-5-yl)(phenyl)methanone (**3e**). Compound **3e** was prepared in 77% yield (95mg) according to the general procedure.

$R_f = 0.2$  (petroleum ether/ethyl acetate = 5/1); Yellow solid; mp 127-129 °C;  $^1\text{H NMR}$  (500 MHz,  $\text{CDCl}_3$ ):  $\delta$  7.54 (d,  $J = 7.2$  Hz, 2H), 7.48-7.45 (m, 1H), 7.42-7.39 (m, 3H), 7.29 (d,  $J = 8.6$  Hz, 2H), 7.18 (d,  $J = 8.7$  Hz, 2H), 6.88-6.83 (m, 4H), 5.08 (s, 2H), 4.45 (s, 2H);  $^{13}\text{C NMR}$  (125 MHz,  $\text{CDCl}_3$ ):  $\delta$  193.5, 147.0, 145.3, 142.6, 139.3, 130.7, 130.1, 130.1, 129.4, 128.5, 128.4, 126.4, 119.8, 119.2, 111.3, 65.8, 47.2; HRMS (ESI)  $m/z$ :  $[\text{M}+\text{H}]^+$  Calcd for  $\text{C}_{23}\text{H}_{19}\text{Cl}_2\text{N}_2\text{O}$  409.0869; found, 409.0865.

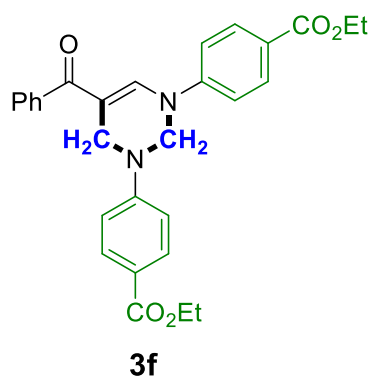

*Diethyl 4,4'-(5-benzoylpyrimidine-1,3(2H,4H)-diyl)dibenzoate (3f)*. Compound **3f** was prepared in 55% yield (80 mg) according to the general procedure.  $R_f = 0.2$  (petroleum ether/ethyl acetate = 15/1); White solid; mp 120-122 °C;  $^1\text{H NMR}$  (400 MHz,  $\text{CDCl}_3$ ):  $\delta$  8.03 (d,  $J = 8.7$  Hz, 2H), 7.90 (d,  $J = 8.8$  Hz, 2H), 7.57-7.55 (m, 3H), 7.50-7.47 (m, 1H), 7.44-7.40 (m, 2H), 6.96-6.90 (m, 4H), 5.25 (s, 2H), 4.57 (s, 2H), 4.38-4.28 (m, 4H), 1.39-1.32 (m, 6H);  $^{13}\text{C NMR}$  (100 MHz,  $\text{CDCl}_3$ ):  $\delta$  193.6, 166.4, 165.8, 151.8, 147.0, 144.2, 139.0, 131.7, 131.4, 131.0, 128.6, 128.5, 126.1, 122.7, 116.8, 116.1, 113.0, 63.8, 61.2, 60.7, 47.0, 14.5, 14.5; HRMS (ESI)  $m/z$ :  $[\text{M}+\text{H}]^+$  Calcd for  $\text{C}_{29}\text{H}_{29}\text{N}_2\text{O}_5$  485.2071; found, 485.2070.

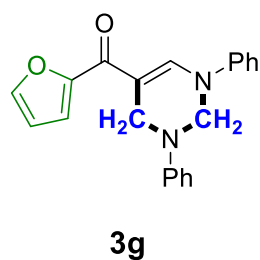

(1,3-Diphenyl-1,2,3,4-tetrahydropyrimidin-5-yl)(furan-2-yl)methanone (3g).<sup>11</sup>

Compound **3g** was prepared in 83% yield (82mg) according to the general procedure.  $R_f = 0.2$  (petroleum ether/ethyl acetate = 12/1); White solid; mp 104-107 °C;  $^1\text{H}$  NMR (500 MHz,  $\text{CDCl}_3$ ):  $\delta$  8.38 (s, 1H), 7.51 (s, 1H), 7.42-7.39 (m, 2H), 7.23-7.17 (m, 3H), 7.09-7.06 (m, 3H), 6.98 (d,  $J = 8.1$  Hz, 2H), 6.91-6.88 (m, 1H), 6.49-6.48 (m, 1H), 5.16 (s, 2H), 4.48 (s, 2H);  $^{13}\text{C}$  NMR (125 MHz,  $\text{CDCl}_3$ ):  $\delta$  177.9, 153.8, 148.6, 144.7, 144.5, 144.3, 130.0, 129.4, 124.7, 121.3, 118.8, 118.0, 116.0, 111.6, 110.1, 65.7, 47.0; Analytical data for **3g** were consistent with our previous reports.<sup>11</sup>

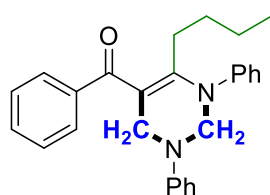

**3h**

(6-Butyl-1,3-diphenyl-1,2,3,4-tetrahydropyrimidin-5-yl)(phenyl)methanone (3h).<sup>11</sup>

Compound **3h** was prepared in 81% yield (96 mg) according to the general procedure.  $R_f = 0.2$  (petroleum ether/ethyl acetate = 15/1); Yellow oil;  $^1\text{H}$  NMR (500 MHz,  $\text{CDCl}_3$ ):  $\delta$  7.68-7.66 (m, 2H), 7.46-7.40 (m, 3H), 7.34-7.31 (m, 2H), 7.25-7.21 (m, 3H), 7.03 (d,  $J = 7.2$  Hz, 2H), 6.92 (d,  $J = 7.9$  Hz, 2H), 6.89-6.87 (m, 1H), 4.89 (s, 2H), 4.32 (s, 2H), 2.11 (t,  $J = 8.0$  Hz, 2H), 1.15-1.09 (m, 2H), 0.76-0.68 (m, 2H), 0.46 (t,  $J = 7.3$  Hz, 3H);  $^{13}\text{C}$  NMR (125 MHz,  $\text{CDCl}_3$ ):  $\delta$  196.3, 157.0, 148.4, 144.6, 142.5, 130.8, 129.5, 129.3, 128.4, 128.0, 127.4, 126.8, 120.6, 117.3, 109.4, 70.6, 49.9, 30.8, 30.7, 22.3, 13.3; Analytical data for **3h** were consistent with our previous reports.<sup>11</sup>

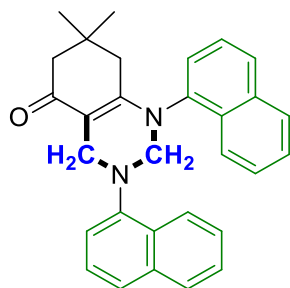

**3i**

7,7-Dimethyl-1,3-di(naphthalen-1-yl)-2,3,4,6,7,8-hexahydroquinazolin-5(1H)-one (**3i**). Compound **3i** was prepared in 80% yield (104 mg) according to the general procedure.  $R_f = 0.2$  (petroleum ether/ethyl acetate = 4/1); Yellow solid; mp 171-173 °C;  $^1\text{H}$  NMR (500 MHz,  $\text{CDCl}_3$ ):  $\delta$  8.09 (d,  $J = 8.2$  Hz, 1H), 7.82-7.76 (m, 3H), 7.62 (d,  $J = 8.1$  Hz, 1H), 7.46-7.30 (m, 9H), 4.92 (s, 2H), 4.53 (d,  $J = 16.3$  Hz, 1H), 4.45 (d,  $J = 16.3$  Hz, 1H), 2.36-2.29 (m, 2H), 2.15 (d,  $J = 16.8$  Hz, 1H) 1.79 (d,  $J = 12.5$  Hz, 1H), 0.99 (s, 3H), 0.98 (s, 3H);  $^{13}\text{C}$  NMR (125 MHz,  $\text{CDCl}_3$ ):  $\delta$  193.8, 158.3, 146.3, 138.8, 135.0, 134.6, 131.0, 128.7, 128.6, 128.6, 128.5, 127.4, 126.9, 126.0, 125.9, 125.8, 125.7, 125.7, 124.4, 123.4, 122.4, 116.7, 105.0, 71.9, 50.3, 47.9, 40.7, 32.6, 29.1, 27.9; HRMS (ESI)  $m/z$ :  $[\text{M}+\text{H}]^+$  Calcd for  $\text{C}_{30}\text{H}_{29}\text{N}_2\text{O}$  433.2274; found, 433.2269.

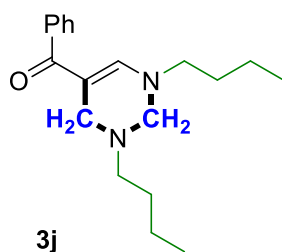

(1,3-Dibutyl-1,2,3,4-tetrahydropyrimidin-5-yl)(phenyl)methanone (**3j**). Compound **3j** was prepared in 75% yield (67 mg) according to the general procedure.  $R_f = 0.2$  (petroleum ether/ethyl acetate = 15/1); Yellow oil;  $^1\text{H}$  NMR (400 MHz,  $\text{CDCl}_3$ ):  $\delta$  7.48-7.38 (m, 5H), 7.06 (s, 1H), 3.99 (s, 2H), 3.68 (s, 2H), 3.09 (t,  $J = 6.8$  Hz, 2H), 2.53 (t,  $J = 7.1$  Hz, 2H), 1.56-1.48 (m, 4H), 1.40-1.27 (m, 4H), 0.96-0.90 (m, 6H);  $^{13}\text{C}$  NMR (100 MHz,  $\text{CDCl}_3$ ):  $\delta$  192.3, 150.5, 140.7, 129.6, 128.4, 128.1, 105.0, 67.3, 54.3, 53.1, 47.7, 31.1, 30.1, 20.7, 19.8, 14.1, 13.7; HRMS (ESI)  $m/z$ :  $[\text{M}+\text{H}]^+$  Calcd for  $\text{C}_{19}\text{H}_{29}\text{N}_2\text{O}$  301.2274; found, 301.2272.

## Synthesis and characterization of 1,4-dihydropyridines

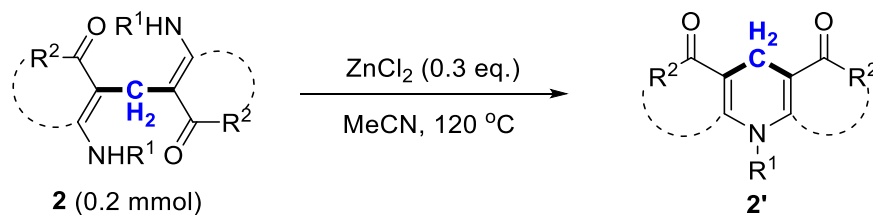

In an oven-dried seal tube (25 mL) containing a magnetic stirring bar was added **2** (0.2 mmol) and ZnCl<sub>2</sub> (8.2 mg, 0.06 mmol). Then, the vessel was evacuated and refilled with argon (Ar) for three times. Under a stream of Ar, to this vessel was added MeCN (3 mL). Then the vessel was sealed and stirred in a 120 °C oil bath for the corresponding time (see Scheme 2). The reaction could be monitored by TLC analysis. The resulting mixture was concentrated under reduced pressure and subjected to column chromatography for purification directly, using petroleum ether/ethyl acetate/dichloromethane/Et<sub>3</sub>N as the eluent.

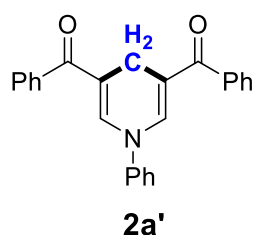

(1-Phenyl-1,4-dihydropyridine-3,5-diyl)bis(phenylmethanone) (**2a'**). Compound **2a'** was prepared in 70% yield (56 mg) according to the general procedure.  $R_f = 0.2$  ((petroleum ether/ethyl acetate/dichloromethane/Et<sub>3</sub>N = 100/10/10/1); Yellow solid; mp 142-144 °C; <sup>1</sup>H NMR (500 MHz, CDCl<sub>3</sub>): δ 7.63-7.62 (m, 4H), 7.51-7.48 (m, 2H), 7.45-7.42 (m, 4H), 7.37-7.34 (m, 2H), 7.24-7.21 (m, 1H), 7.17 (s, 2H), 7.06 (d,  $J = 7.7$  Hz, 2H), 3.65 (s, 2H); <sup>13</sup>C NMR (125 MHz, CDCl<sub>3</sub>): δ 194.9, 143.2, 141.6, 139.1, 131.2, 130.2, 128.6, 128.5, 126.8, 120.9, 117.4, 21.9; Analytical data for **2a'** were consistent with our previous reports.<sup>10</sup>

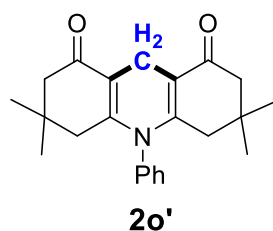

*3,3,6,6-tetramethyl-10-phenyl-3,4,6,7,9,10-hexahydroacridine-1,8(2H,5H)-dione* (**2o'**). Compound **2o'** was prepared in 64% yield (45 mg) according to the general procedure.  $R_f = 0.2$  (petroleum ether/ethyl acetate/dichloromethane/Et<sub>3</sub>N = 100/10/10/1); Yellow solid; mp 248-250 °C; <sup>1</sup>H NMR (500 MHz, CDCl<sub>3</sub>): δ 7.51-7.49 (m, 3H), 7.16 (d,  $J = 7.7$  Hz, 2H), 3.22 (s, 2H), 2.20 (s, 4H), 1.78 (s, 4H), 0.91 (s, 12H); <sup>13</sup>C NMR (125 MHz, CDCl<sub>3</sub>): δ 196.8, 151.0, 139.4, 130.1, 130.2, 130.0, 129.3, 110.96, 50.1, 42.0, 32.4, 28.4, 18.6; Analytical data for **2o'** were consistent with our previous reports.<sup>10</sup>

## Gram-Scale Preparation of 2a

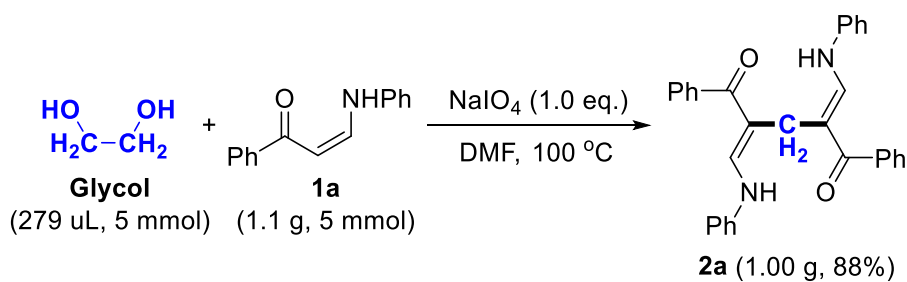

In an oven-dried Schlenk tube (100 mL) containing a magnetic stirring bar was added **1a** (1.1 g, 5 mmol), NaIO<sub>4</sub> (1.1 g, 5 mmol). Then, the vessel was evacuated and refilled with Ar for three times. Under a stream of Ar, to this vessel were added DMF (25 mL) and ethylene glycol (279  $\mu\text{L}$ , 5 mmol). Then the vessel was stirred in a 100  $^\circ\text{C}$  oil bath for about 5 hours. The reaction could be monitored by TLC analysis. Finally, H<sub>2</sub>O (60 mL) was added to reaction system, and the resulting mixture was directly filtered and washed with H<sub>2</sub>O (50 mL  $\times$  6) to give pure products **2a** (1.00 g, 88%).

## Gram-Scale Preparation of 3a

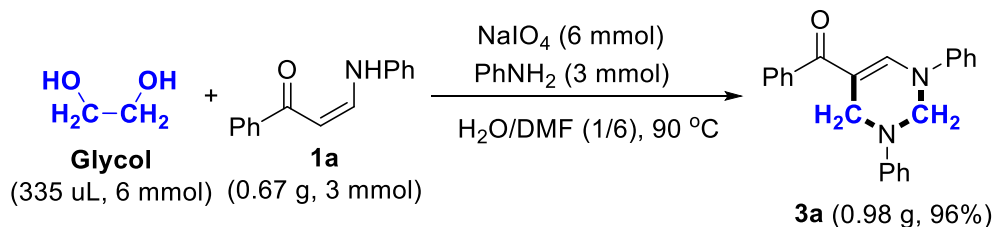

In an oven-dried Schlenk tube (100 mL) containing a magnetic stirring bar was added **1a** (0.67 g, 3 mmol), NaIO<sub>4</sub> (1.3 g, 6 mmol), H<sub>2</sub>O/DMF (35 mL, v/v = 1/6) and ethylene glycol (335  $\mu\text{L}$ , 6 mmol), PhNH<sub>2</sub> (273  $\mu\text{L}$ , 3 mmol). Then the vessel was stirred in a 90  $^\circ\text{C}$  oil bath for about 4 hours. The reaction could be monitored by TLC analysis. Then, H<sub>2</sub>O (50 mL) was added to reaction system, and the resulting mixture was directly filtered and washed with H<sub>2</sub>O (50 mL  $\times$  6) to give pure **3a** (0.98 g, 96%).



## References:

1. J. Yang, C. Wang, X. Xie, H. Li and Y. Li, Acid-Catalyzed Cascade Reactions of Enaminones with Aldehydes: C–H Functionalization To Afford 1,4-Dihydropyridines, *Eur. J. Org. Chem.*, 2010, 4189–4193.
2. B. Datta, M. B. M. Reddy and M. A. Pasha, Molecular Iodine–Catalyzed Mild and Effective Synthesis of  $\beta$ -Enaminones at Room Temperature, *Synth. Comm.*, 2011, **41**, 2331–2336.
3. P. Šimůnek, L. Lusková, M. Svobodová, V. Bertolasi, A. Lyčka and V. Macháček, Synthesis and structure of some azo coupled cyclic  $\beta$ -enaminones, *Magn. Reson. Chem.*, 2007, **45**, 330–339.
4. D. R. Chisholm, R. Valentine, E. Pohl and A. Whiting, Conjugate Addition of 3-Buytn-2-one to Anilines in Ethanol: Alkene Geometric Insights through In Situ FTIR Monitoring, *J. Org. Chem.*, 2016, **81**, 7557–7565.
5. J. Kim and S. H. Hong, Organocatalytic activation of isocyanides: N-heterocyclic carbene-catalyzed enaminone synthesis from ketones, *Chem. Sci.*, 2017, **8**, 2401–2406.
6. S. Sultana, J.-J. Shim, S. H. Kim and Y. R. Lee, Silver(i)/base-promoted propargyl alcohol-controlled regio- or stereoselective synthesis of furan-3-carboxamides and (Z)-enaminones, *Org. Biomol. Chem.*, 2018, **16**, 6749–6759.
7. T. Sakamoto, T. Nagano, Y. Kondo and H. Yamanaka, Condensed Heteroaromatic Ring Systems; XVII:<sup>1</sup> Palladium-Catalyzed Cyclization of  $\beta$ -(2-Halophenyl)amino Substituted  $\alpha,\beta$ -Unsaturated Ketones and Esters to 2,3-Disubstituted Indoles, *Synthesis*, 1990, 215–218.
8. S. S. Palimkar, V. S. More and K. V. Srinivasan, Simple and Efficient One-Pot, Three-Component, Solvent-Free Synthesis of  $\beta$ -Enaminones via Sonogashira Coupling-Michael Addition Sequences, *Synth. Commun.*, 2008, **38**, 1456–1469.
9. J. Liu, W. Wei, T. Zhao, X. Liu, J. Wu, W. Yu and J. Chang, Iodine/Copper Iodide-Mediated C–H Functionalization: Synthesis of Imidazo[1,2-a]pyridines and Indoles from N-Aryl Enamines, *J. Org. Chem.*, 2016, **81**, 9326–9336.
10. Y. Zhao, X. Guo, X. Ding, Z. Zhou, M. Li, N. Feng, B. Gao, X. Lu, Y. Liu and J. You, Reductive CO<sub>2</sub> Fixation via the Selective Formation of C–C Bonds: Bridging Enaminones and Synthesis of 1,4-Dihydropyridines, *Org. Lett.*, 2020, **22**, 8326–8331.
11. Y. Zhao, X. Liu, L. Zheng, Y. Du, X. Shi, Y. Liu, Z. Yan, J. You and Y. Jiang, One-Pot Methylenation–Cyclization Employing Two Molecules of CO<sub>2</sub> with Arylamines and Enaminones, *J. Org. Chem.*, 2020, **85**, 912–923.

## NMR spectra of compounds **2**

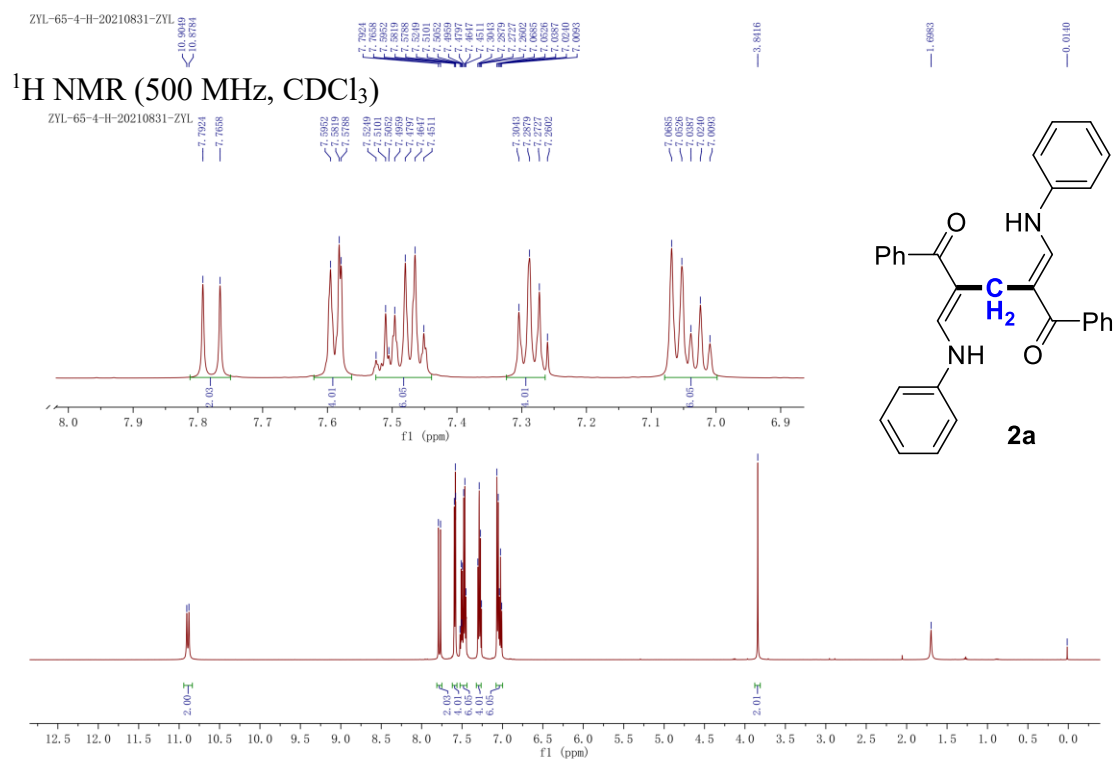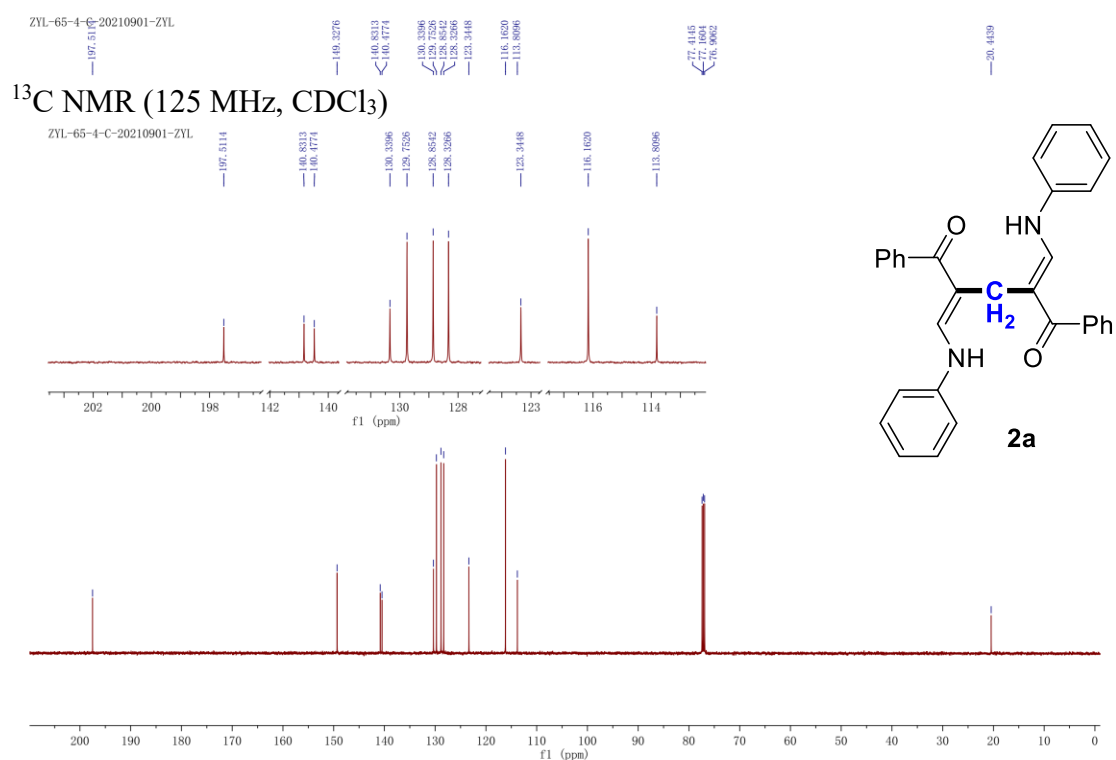

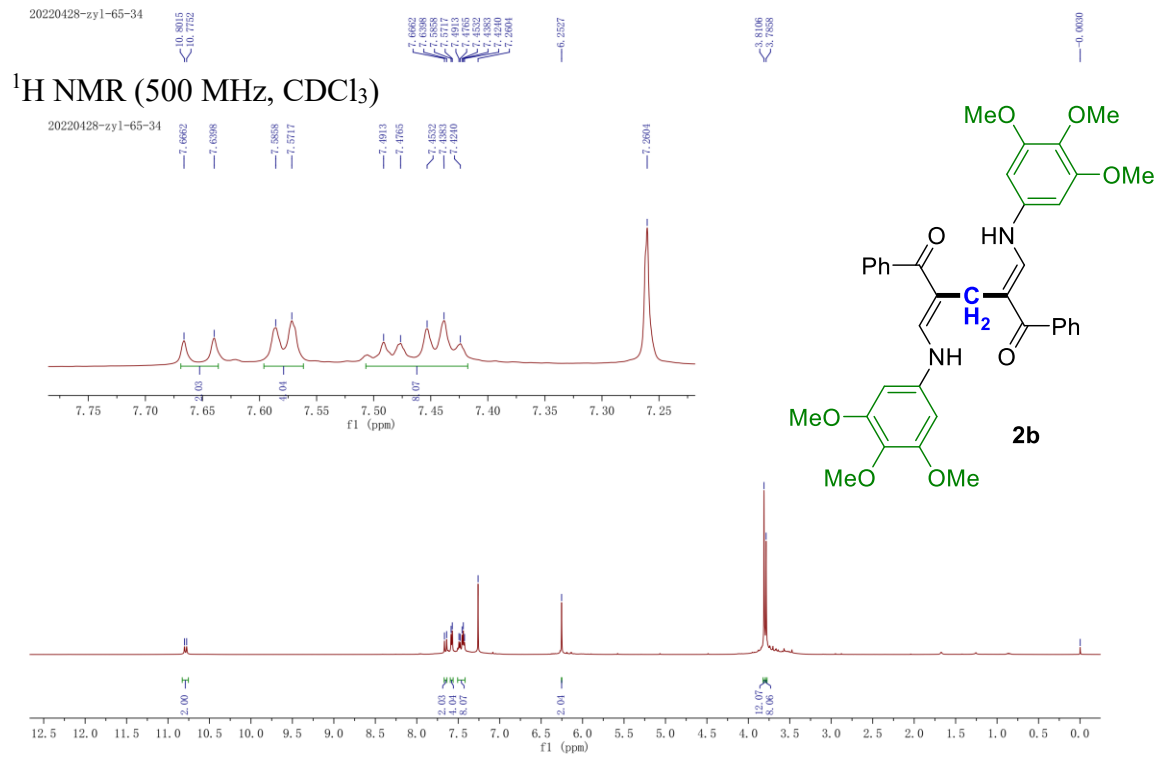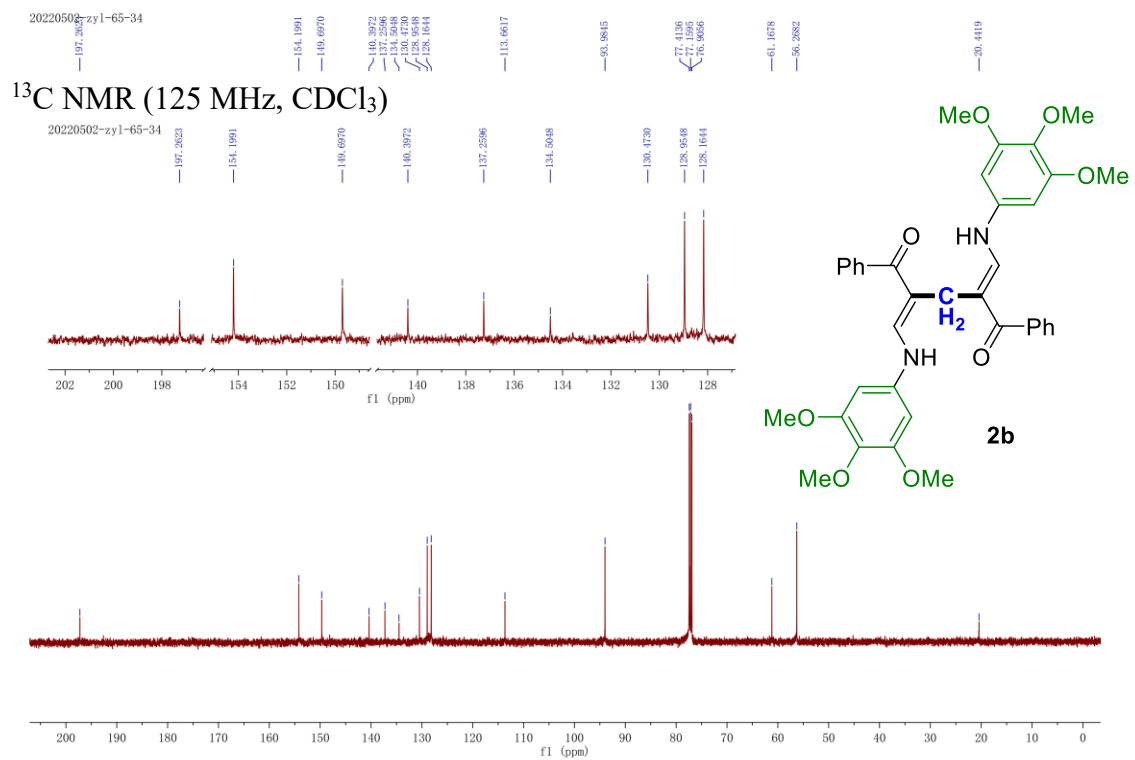

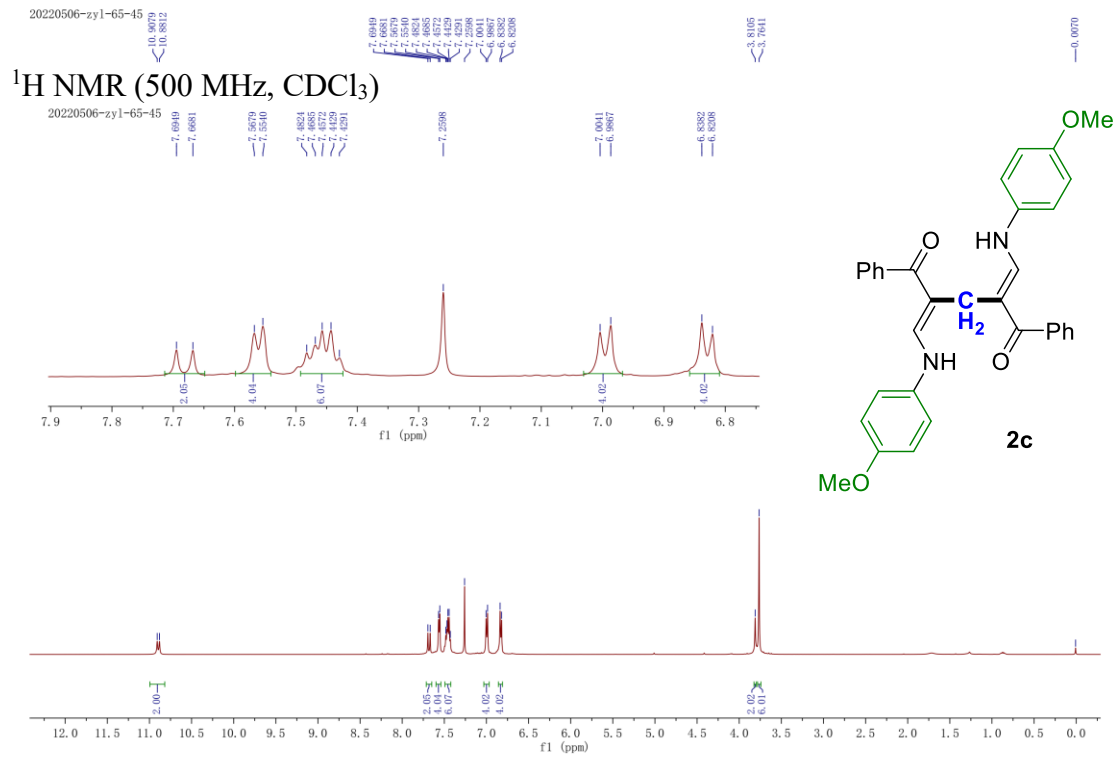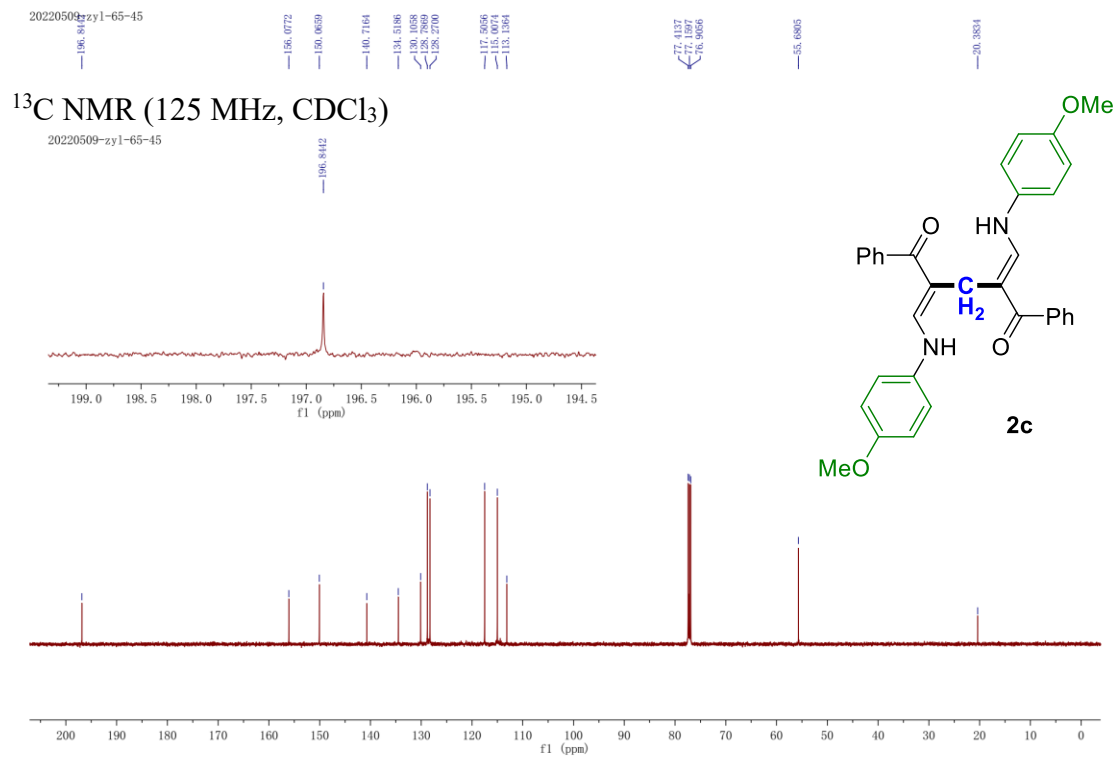

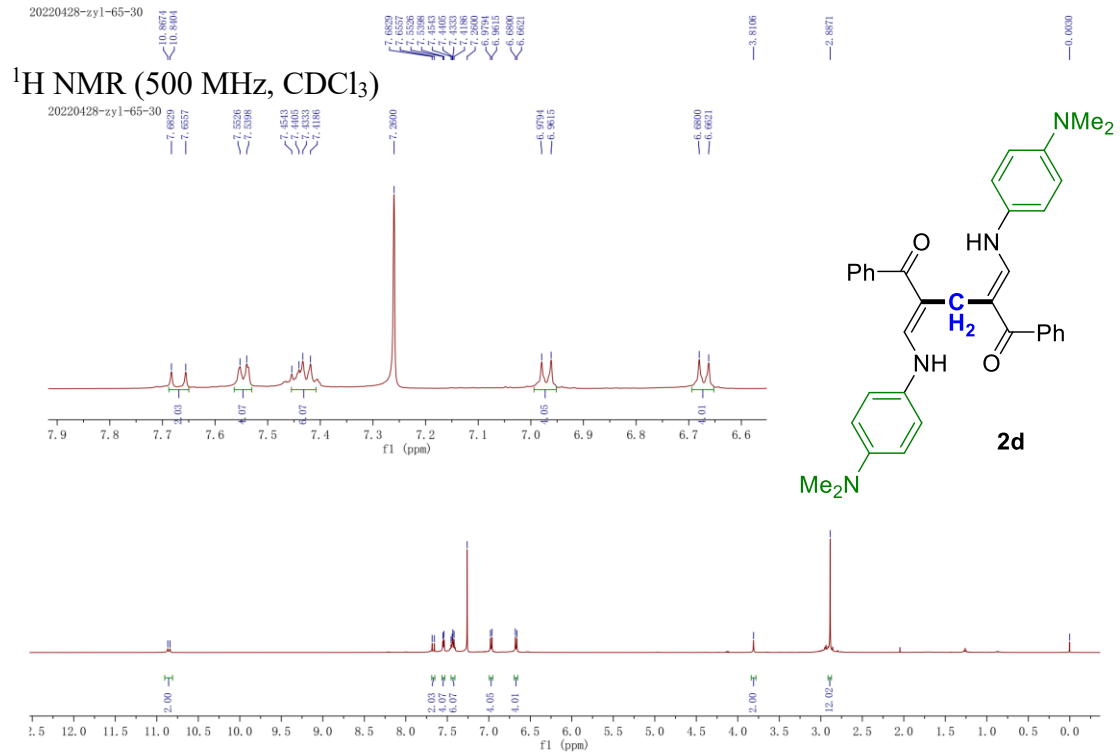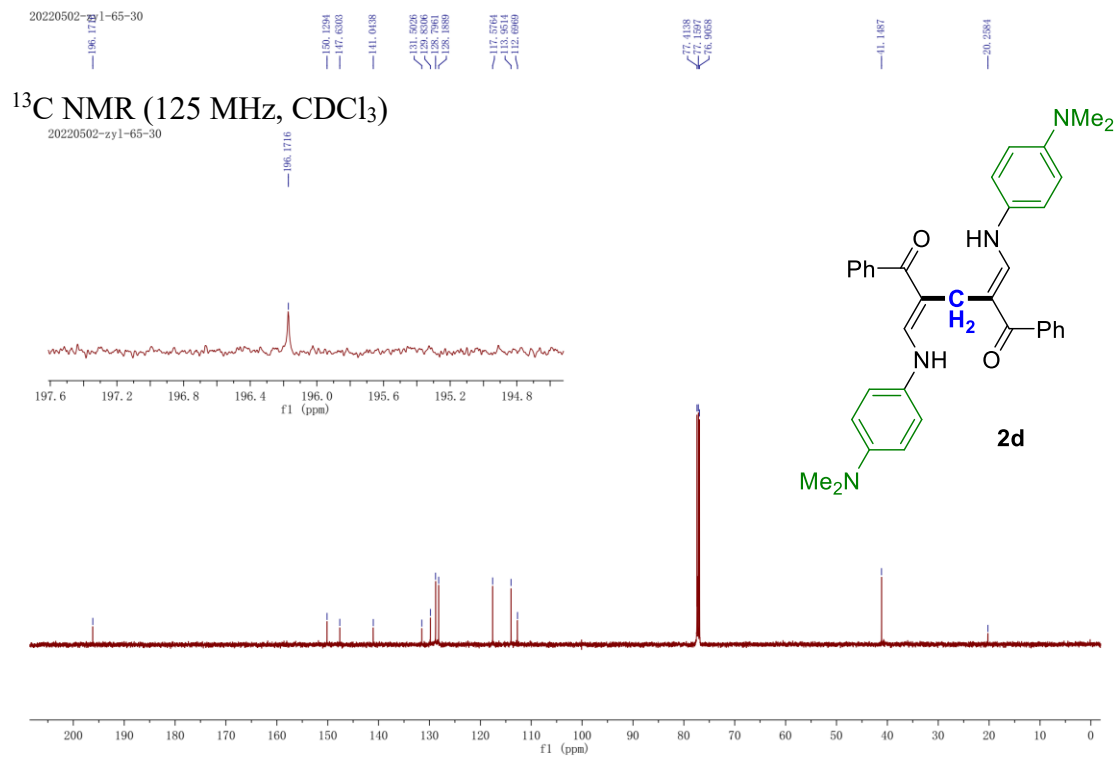

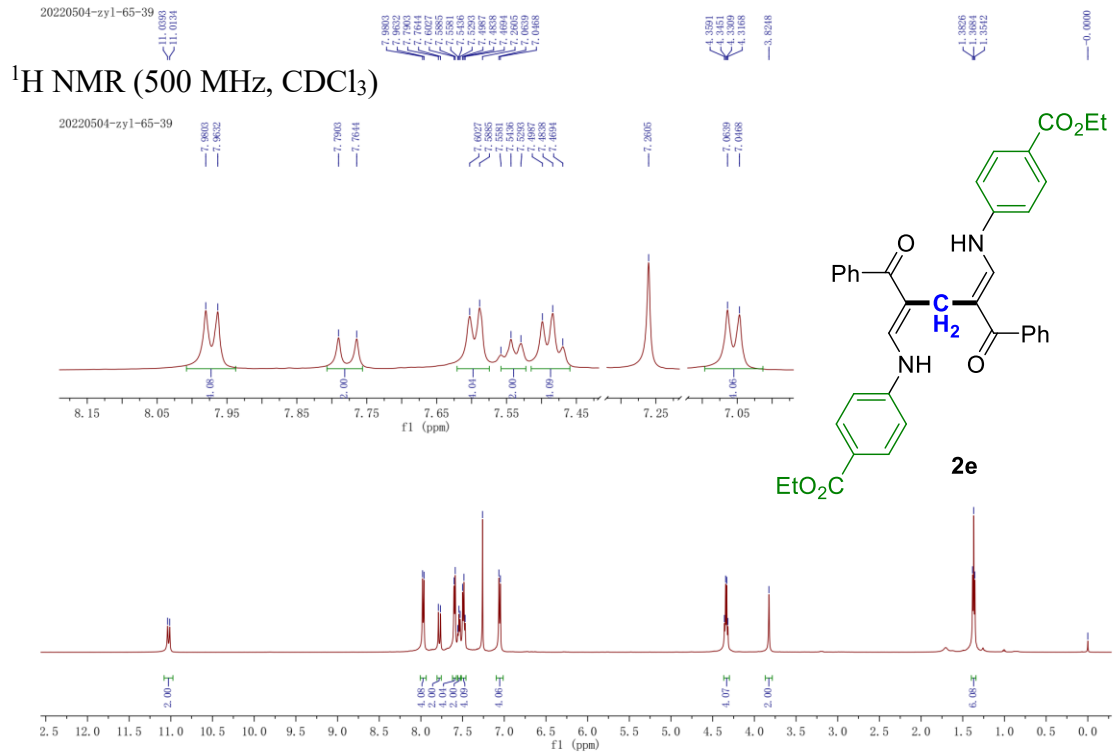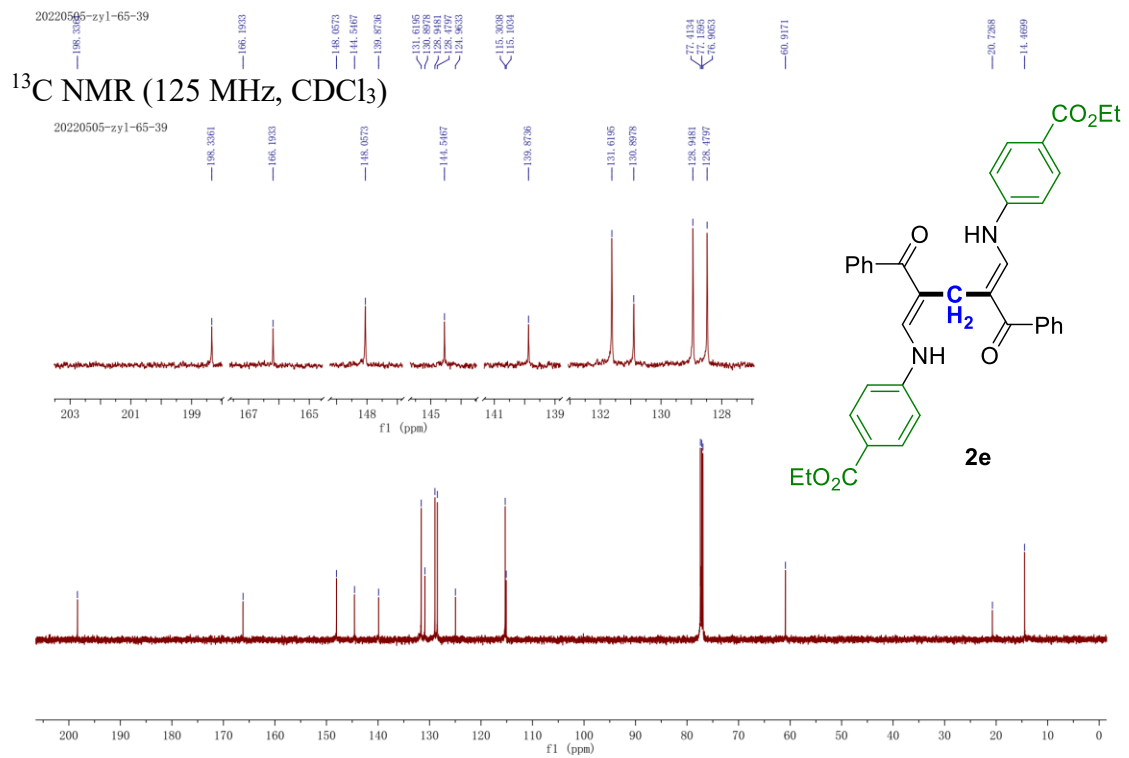

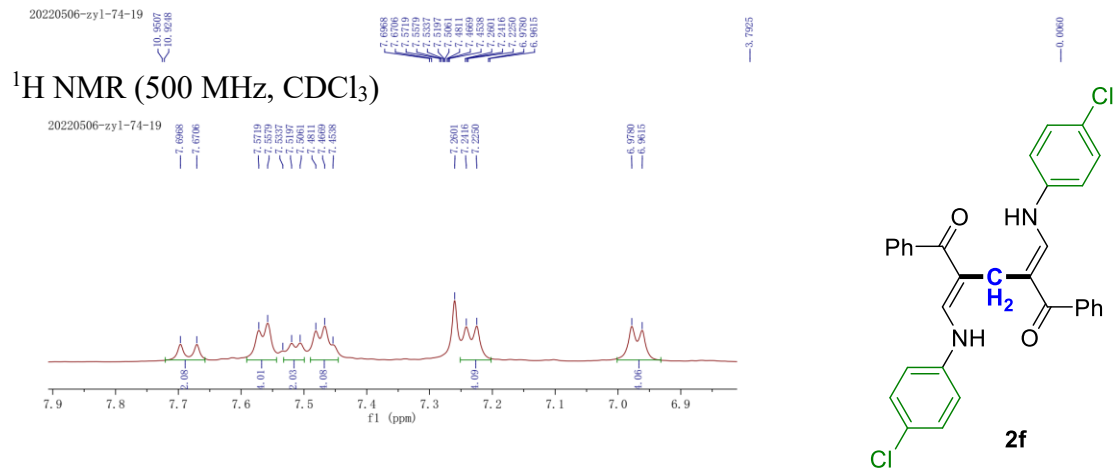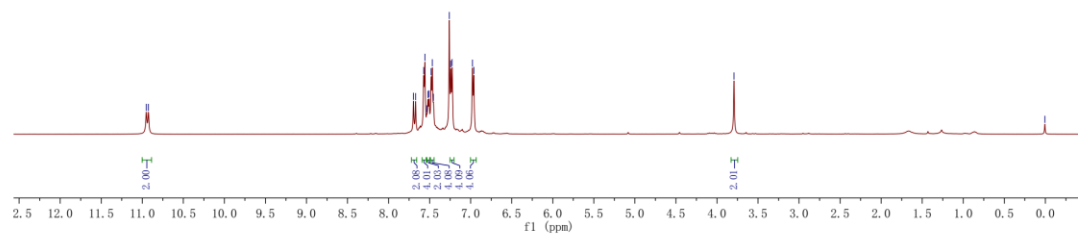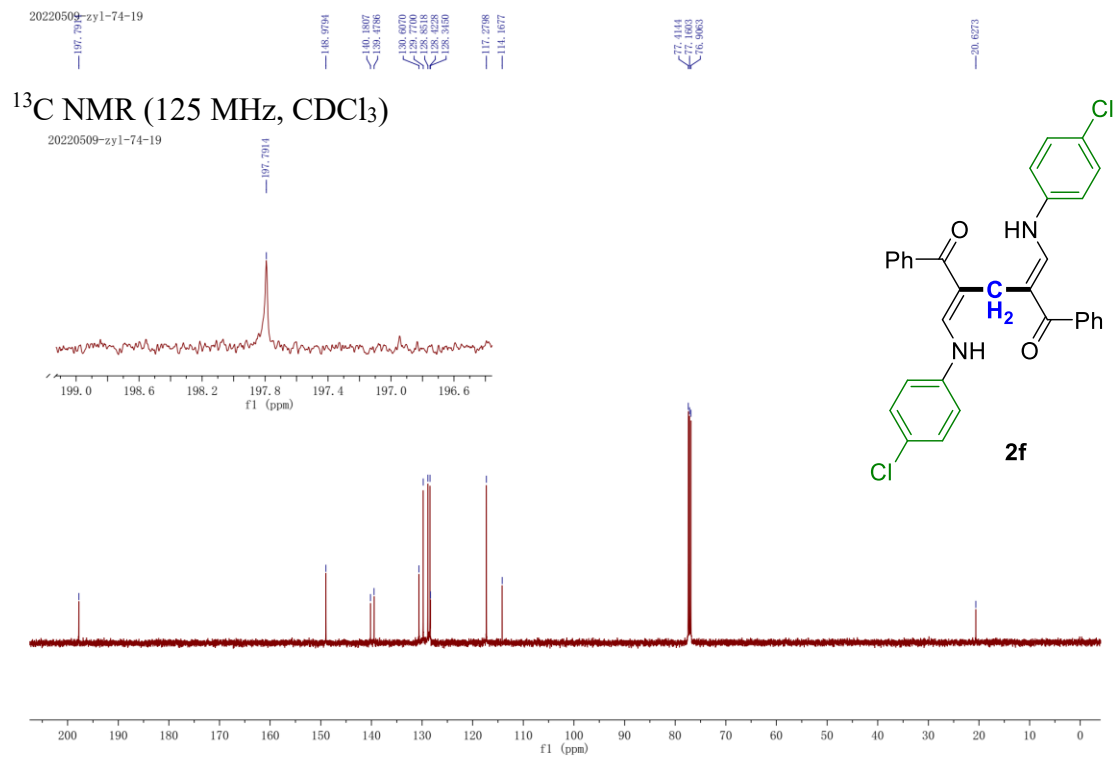

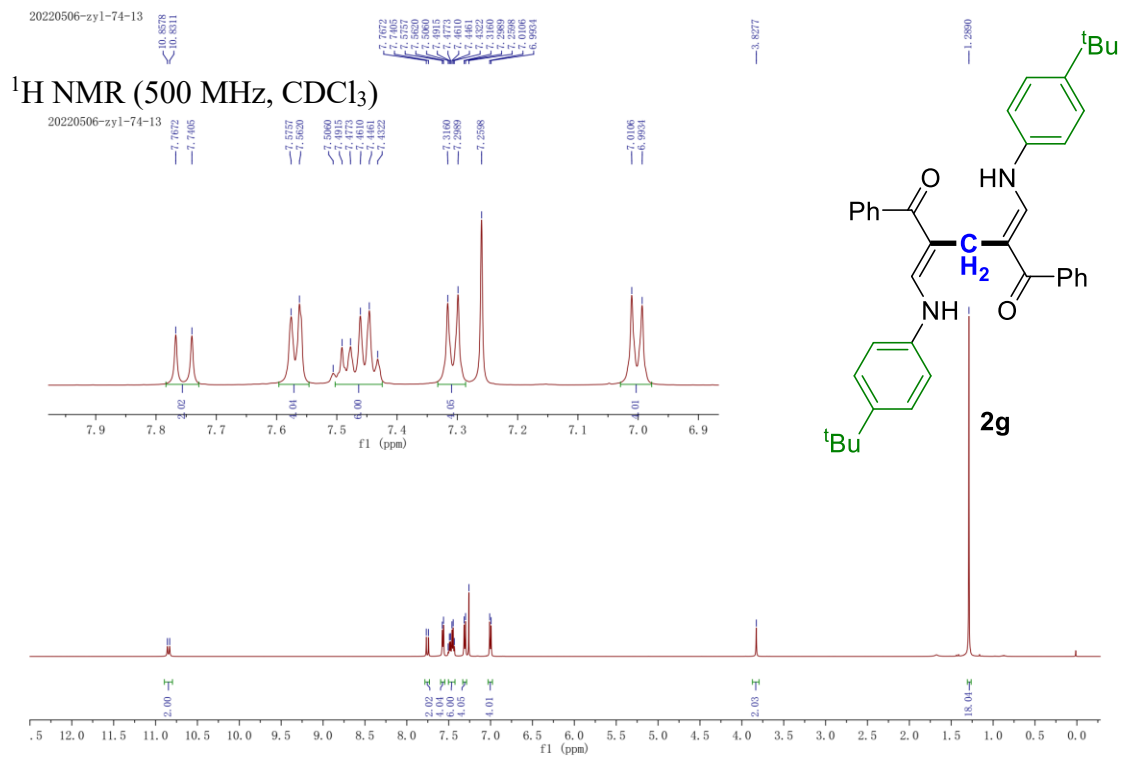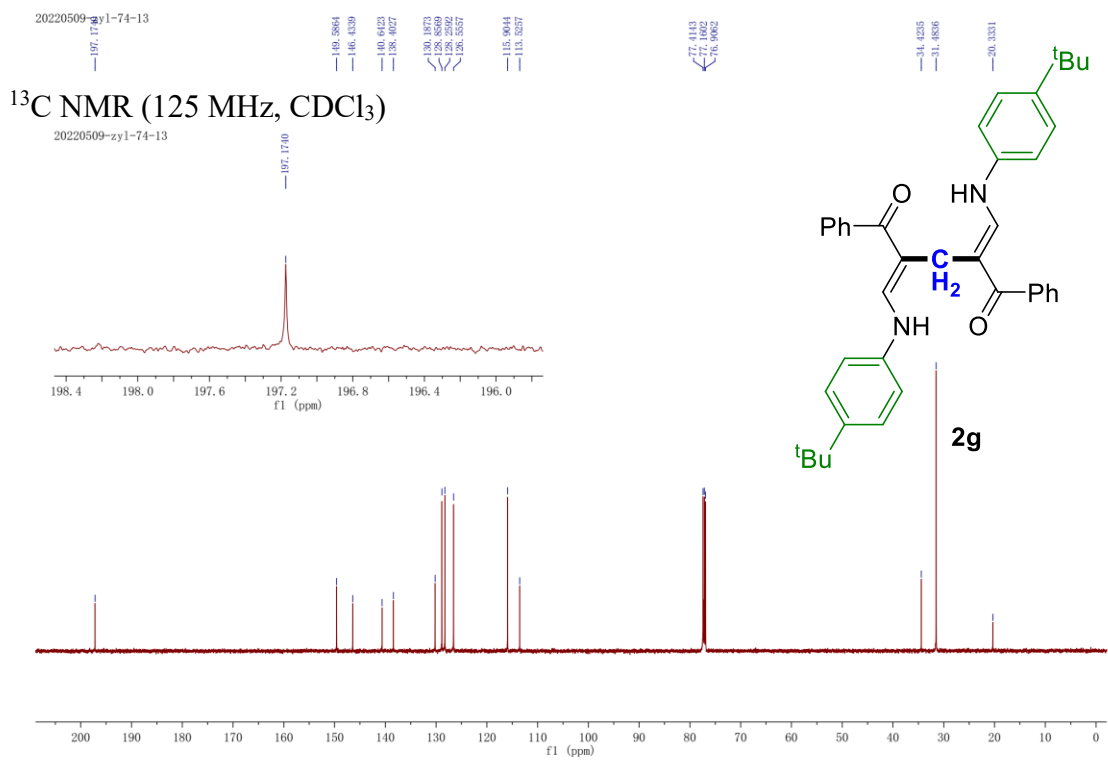



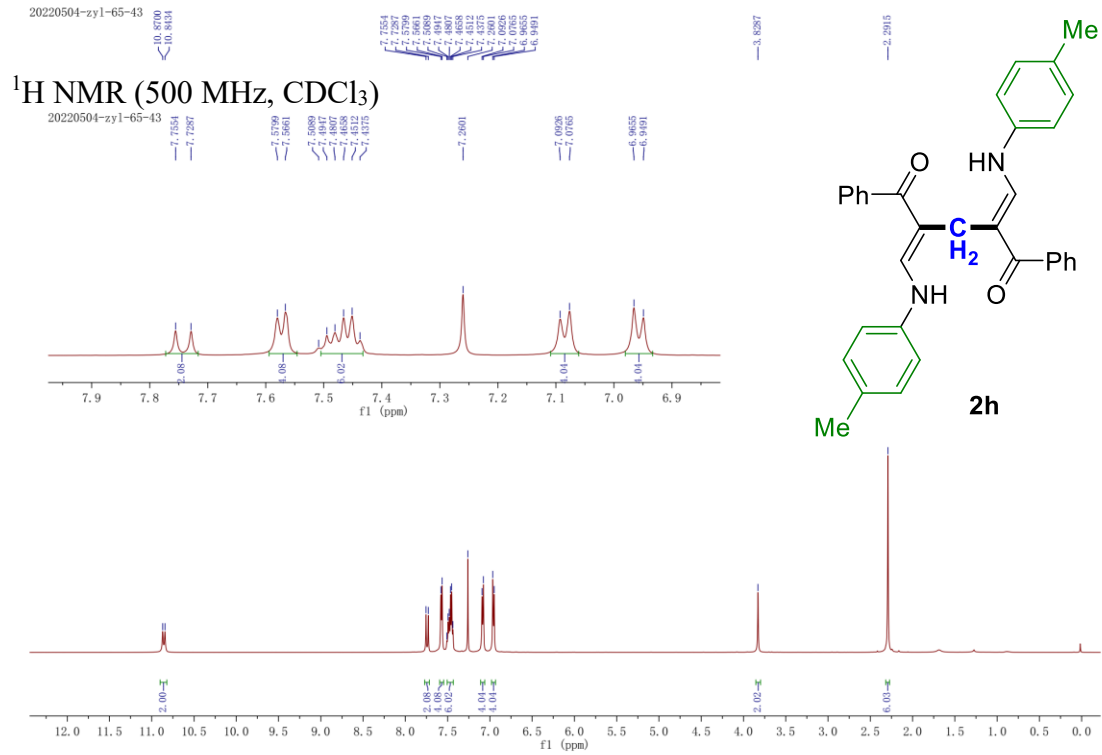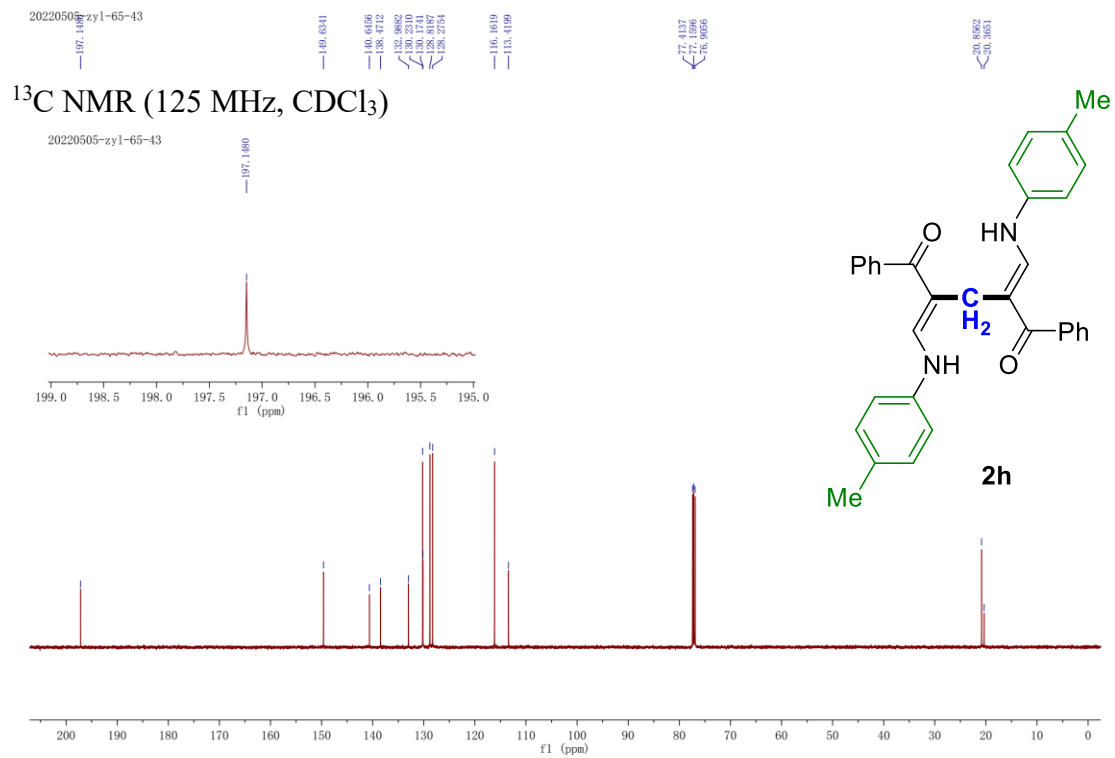

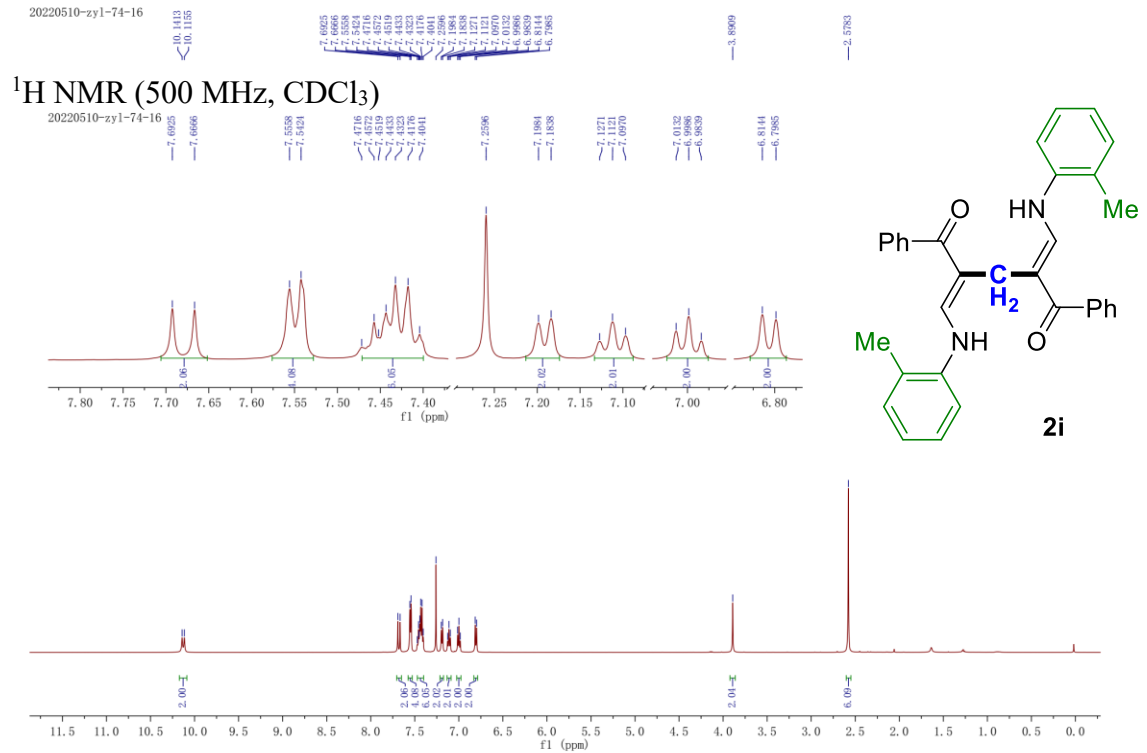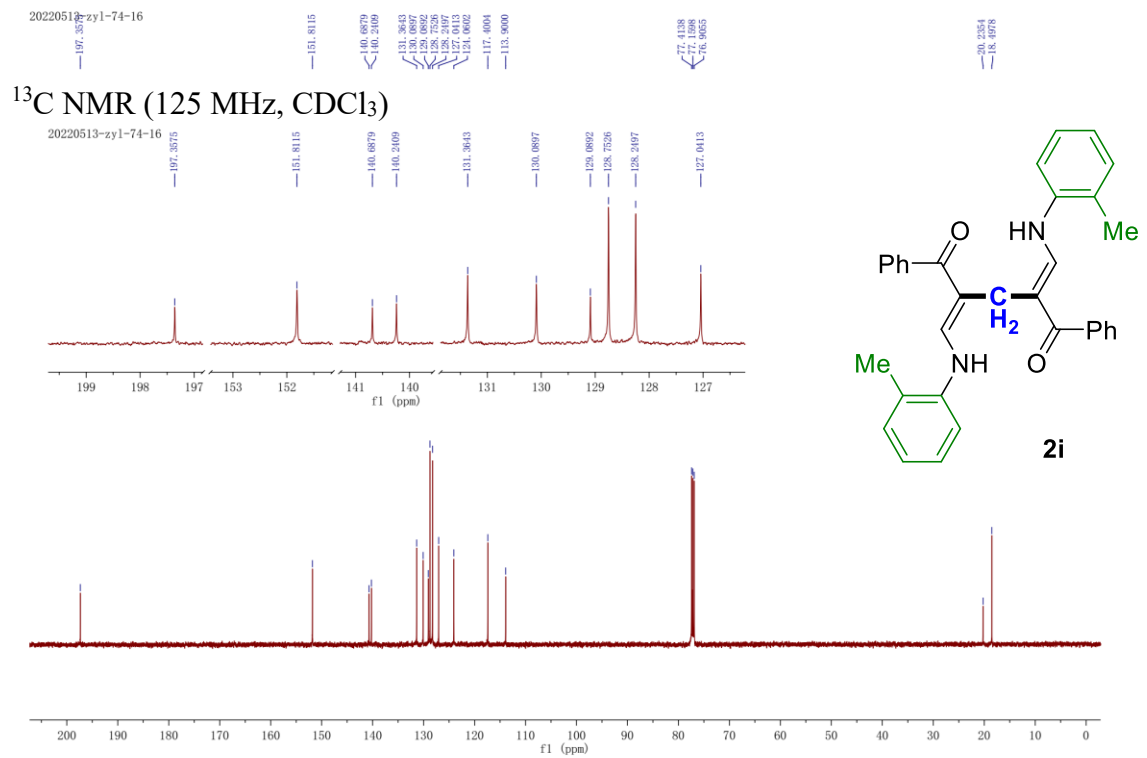

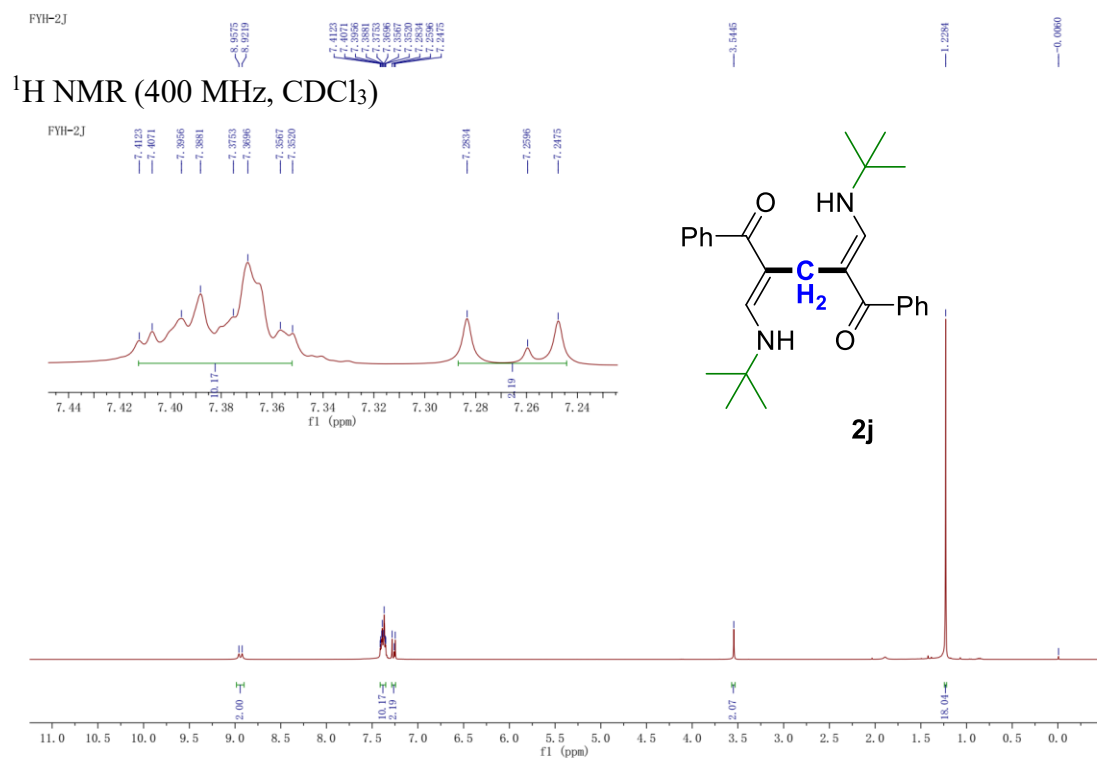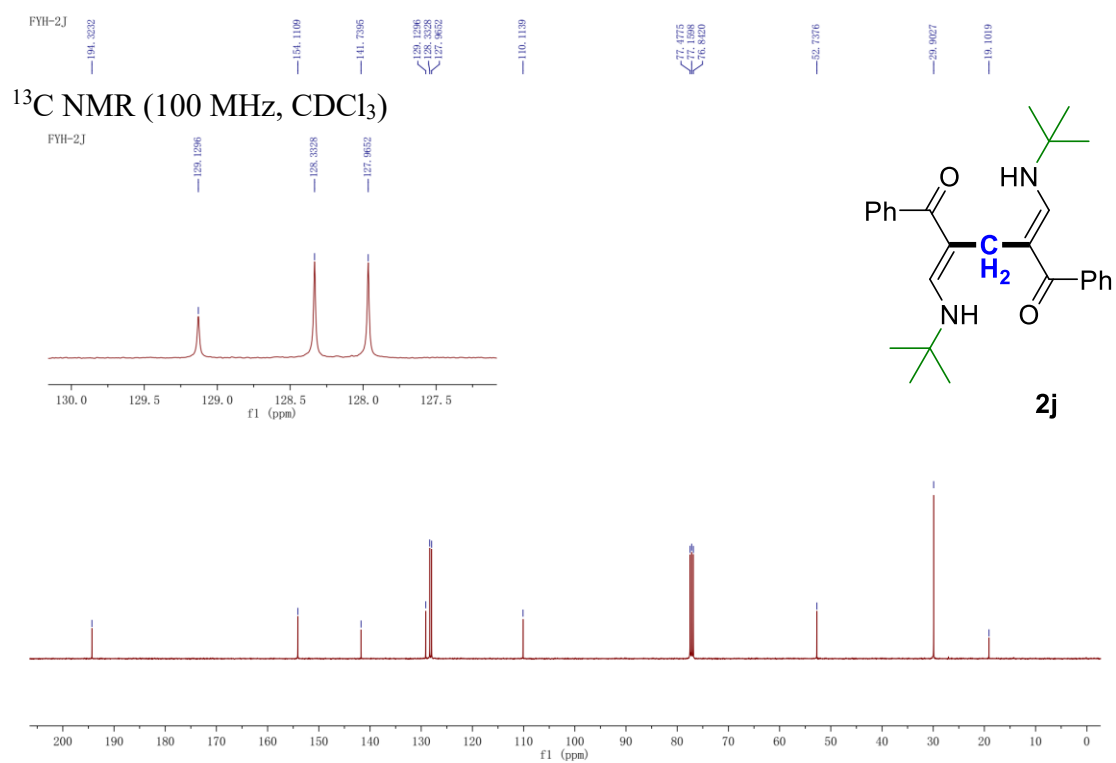

20220421-zyl-65-28  
<sup>1</sup>H NMR (500 MHz, CDCl<sub>3</sub>)

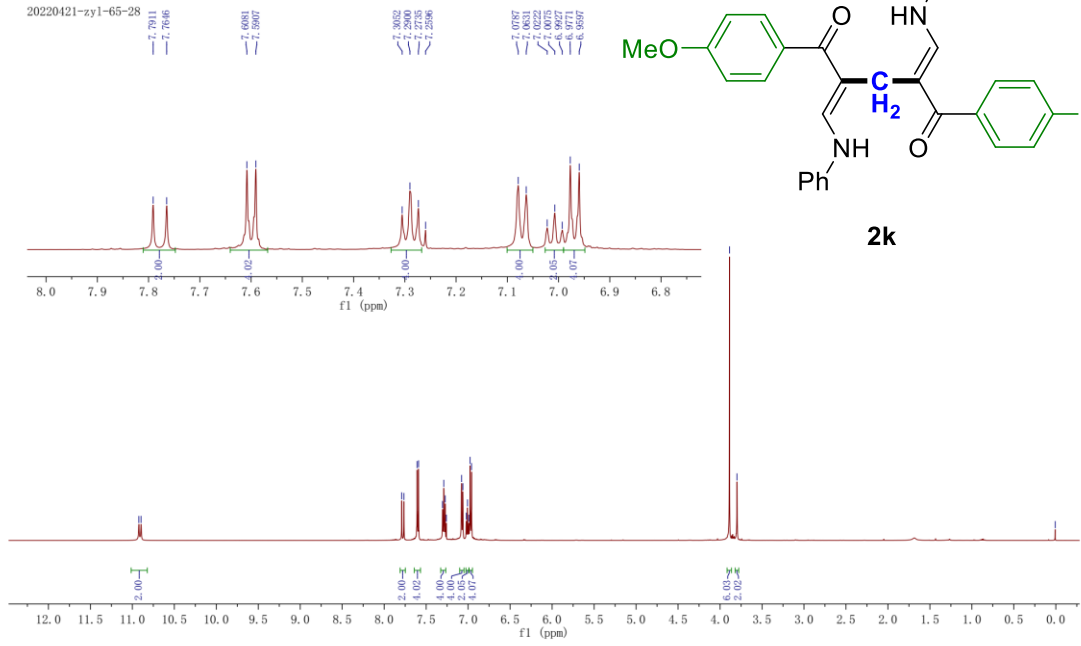

20220510-zyl-65-28  
<sup>13</sup>C NMR (125 MHz, CDCl<sub>3</sub>)

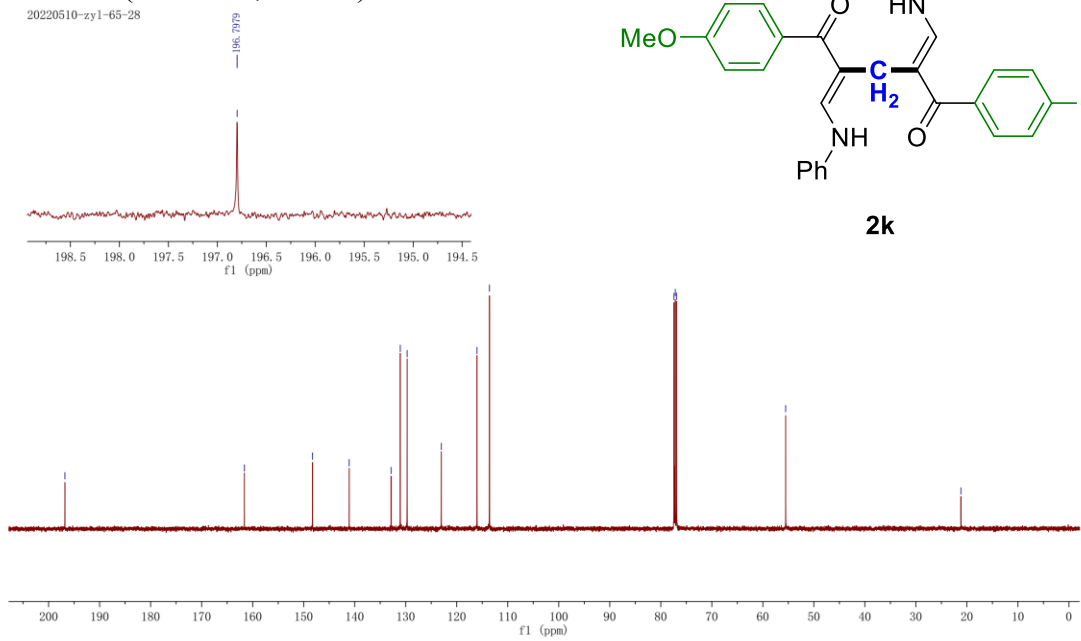

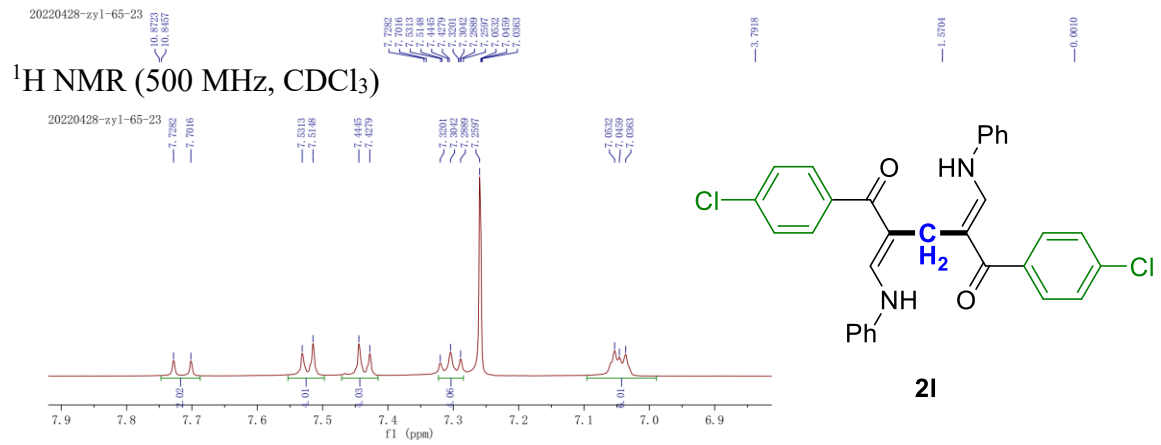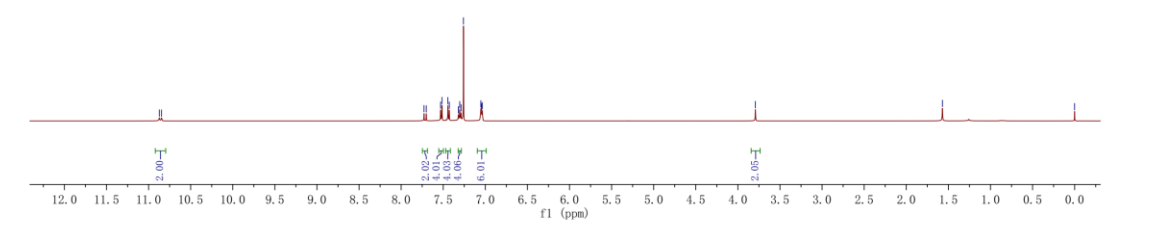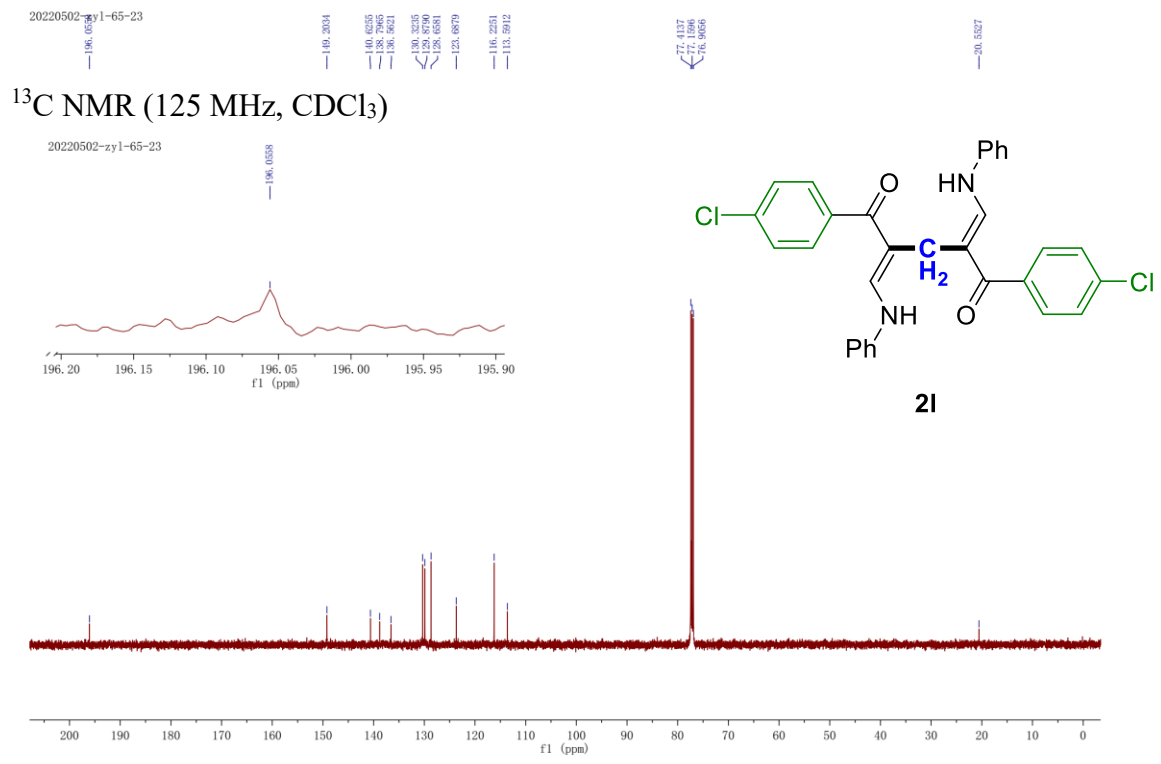

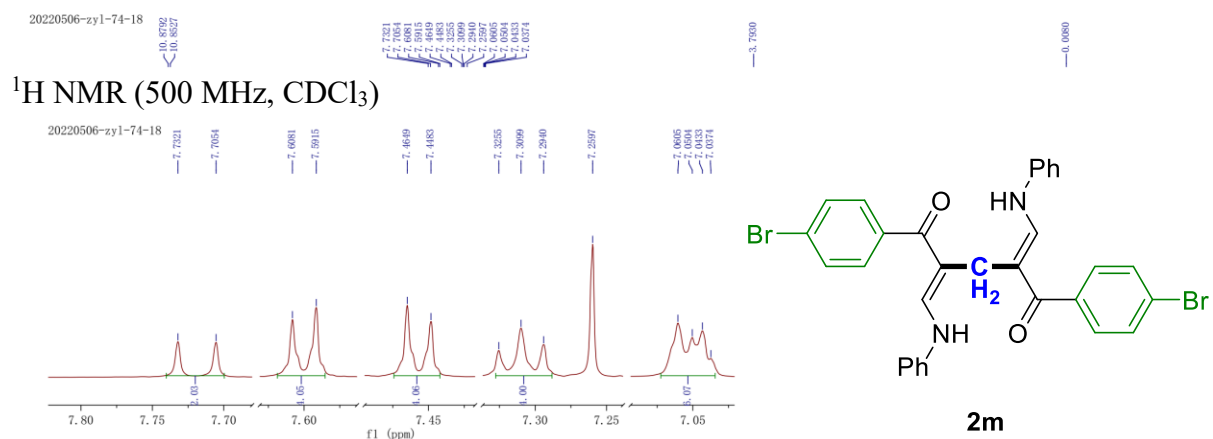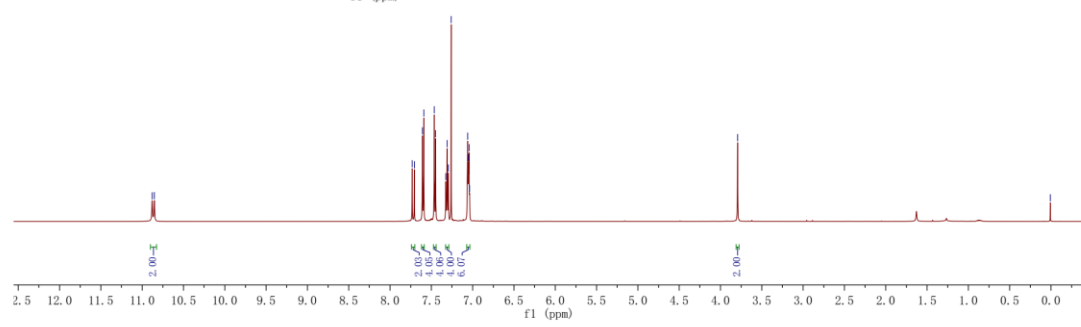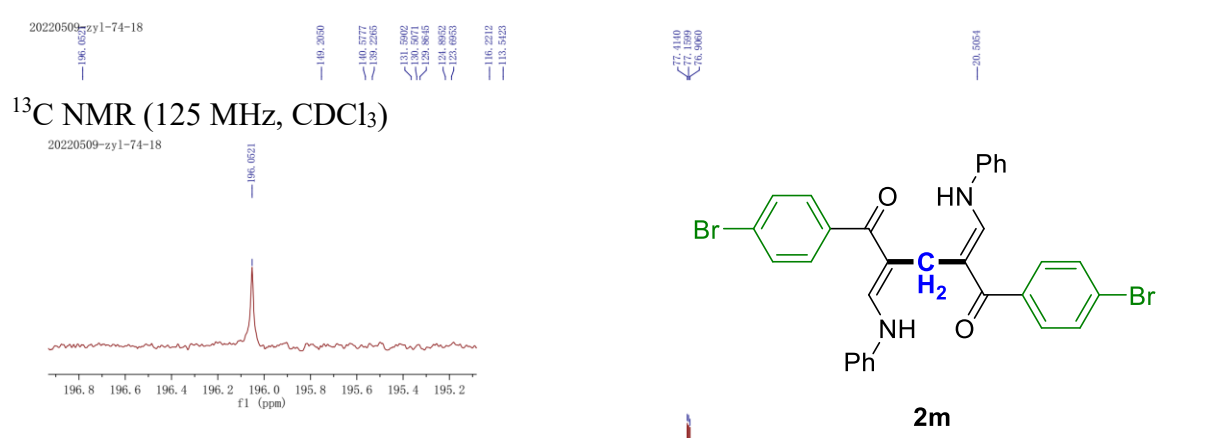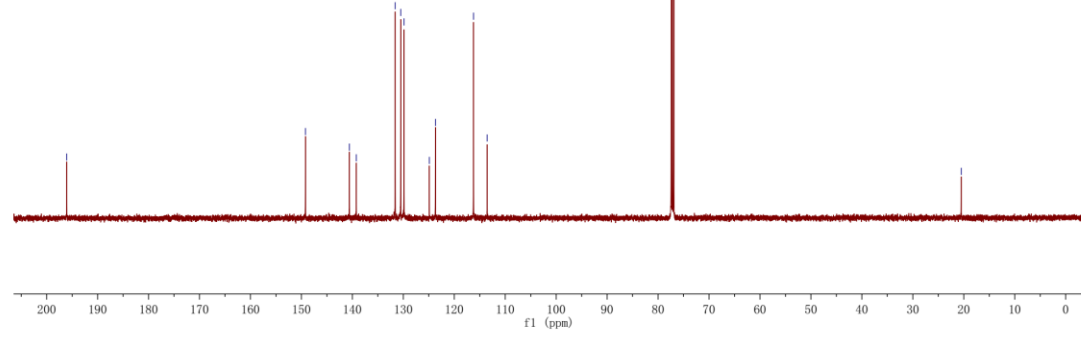

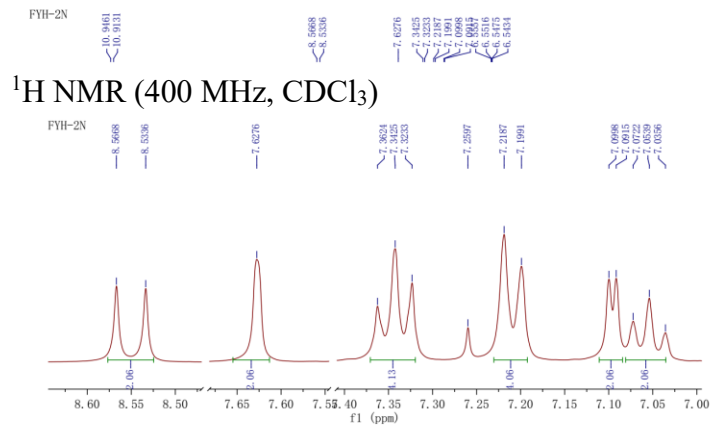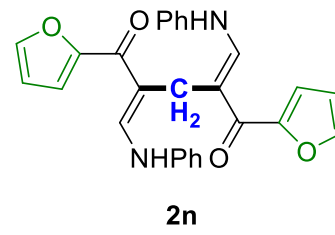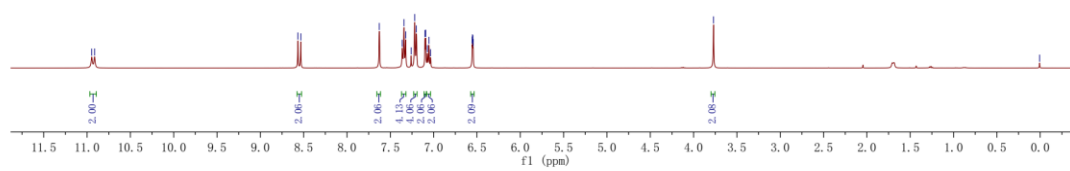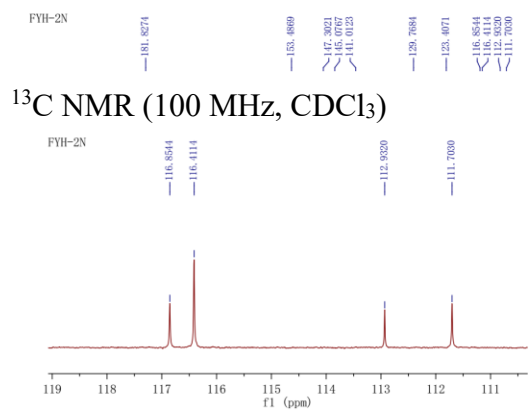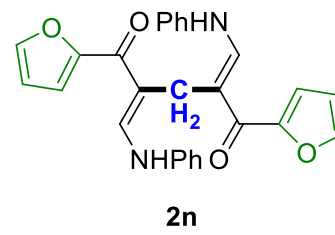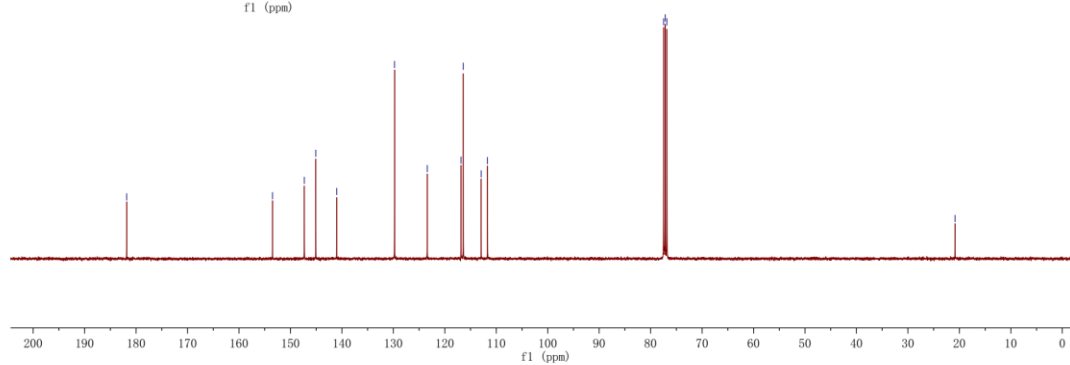

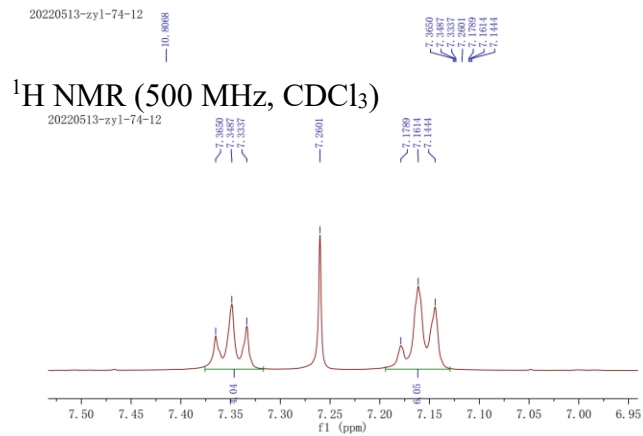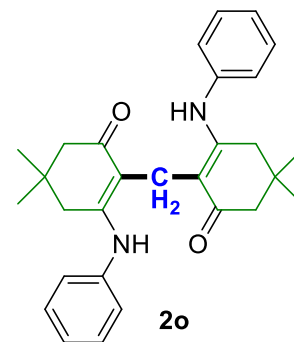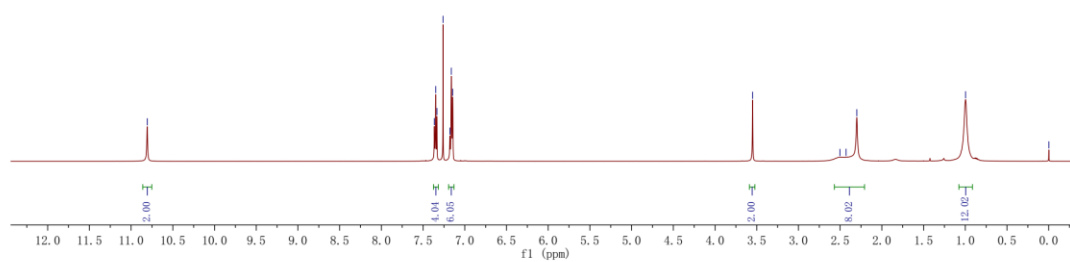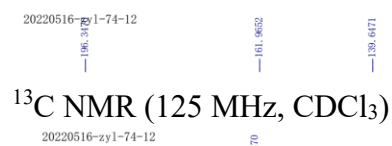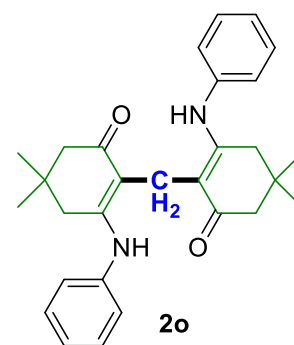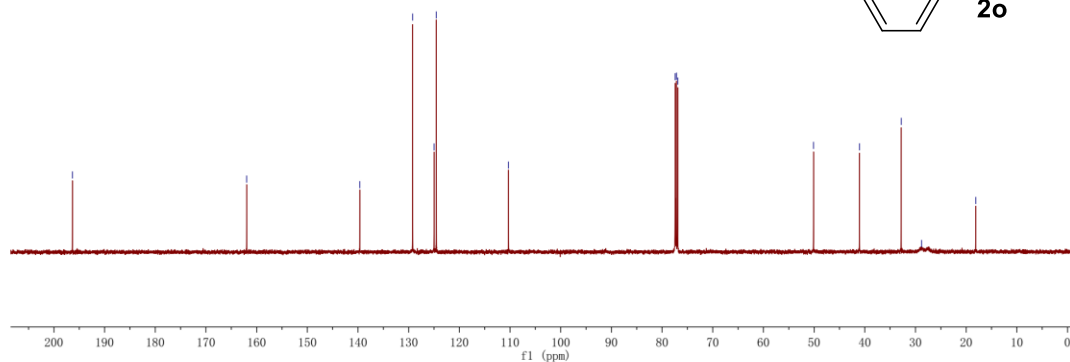



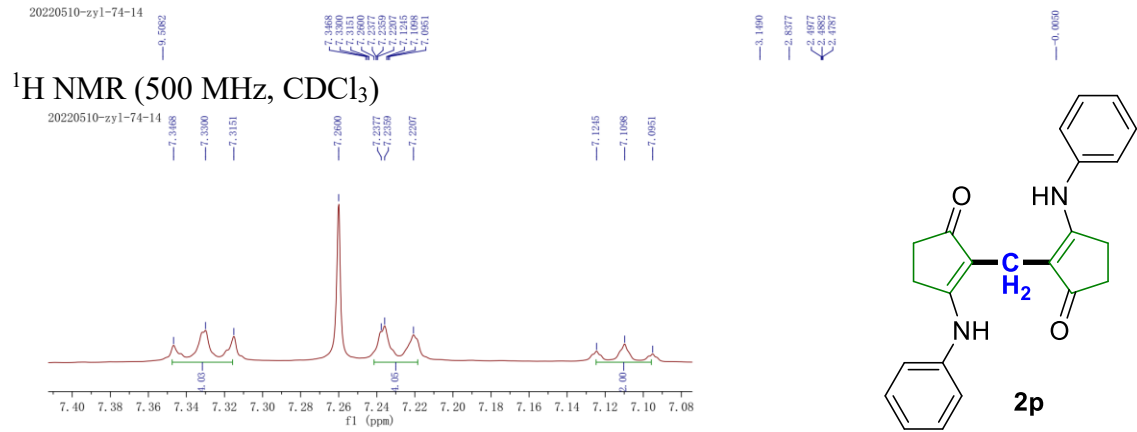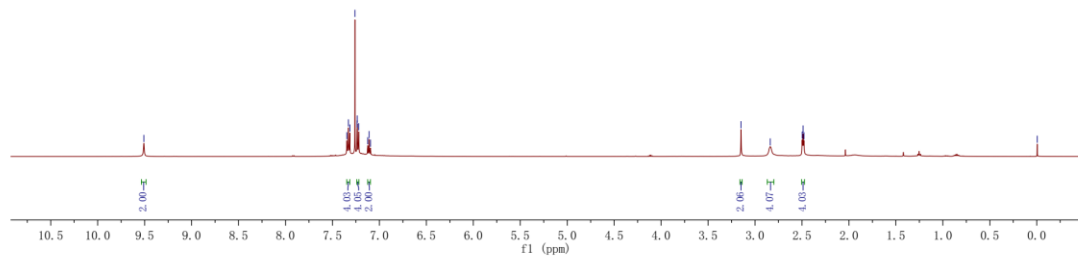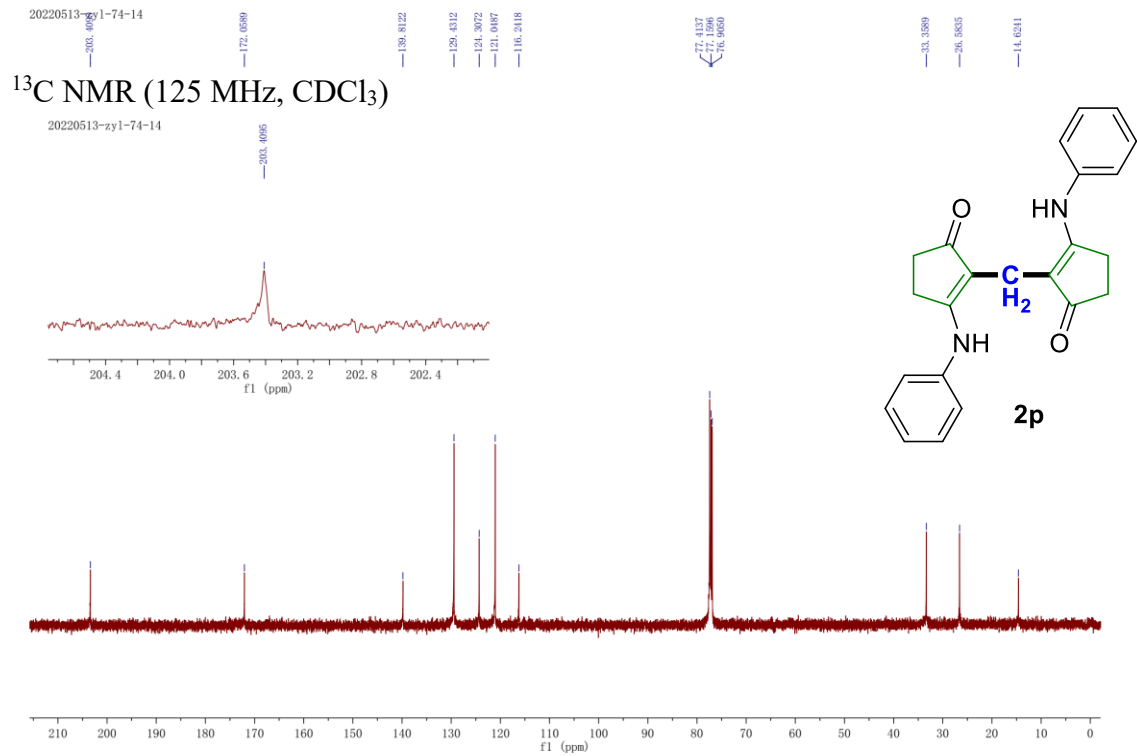

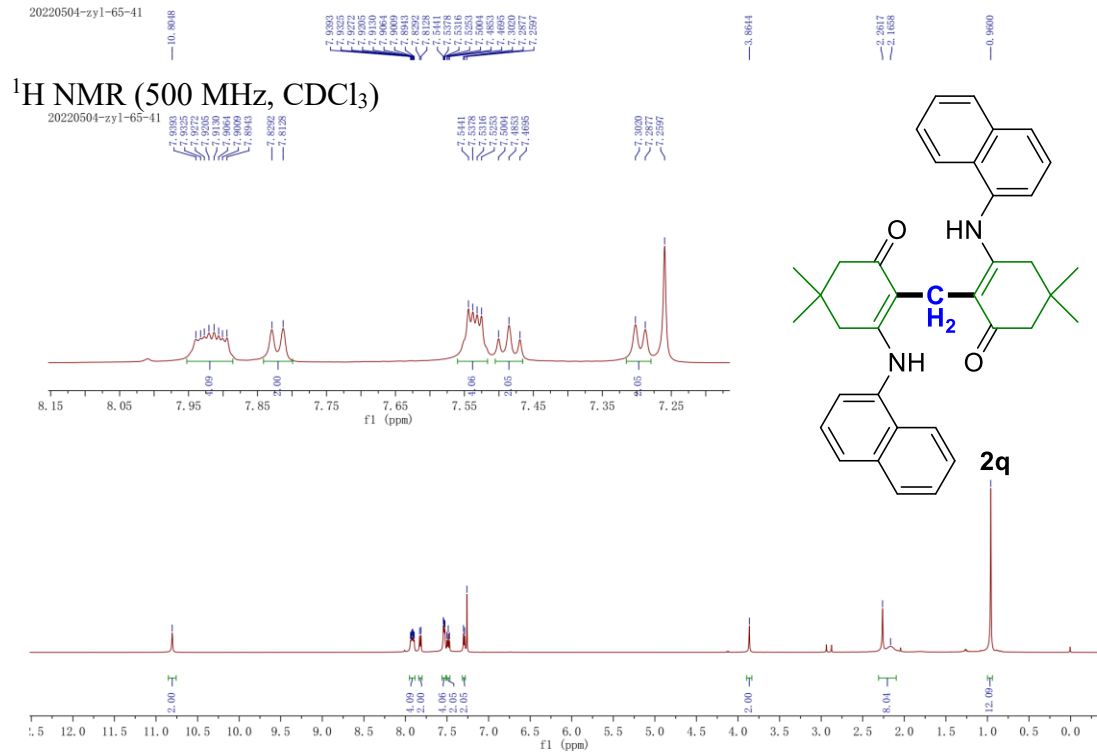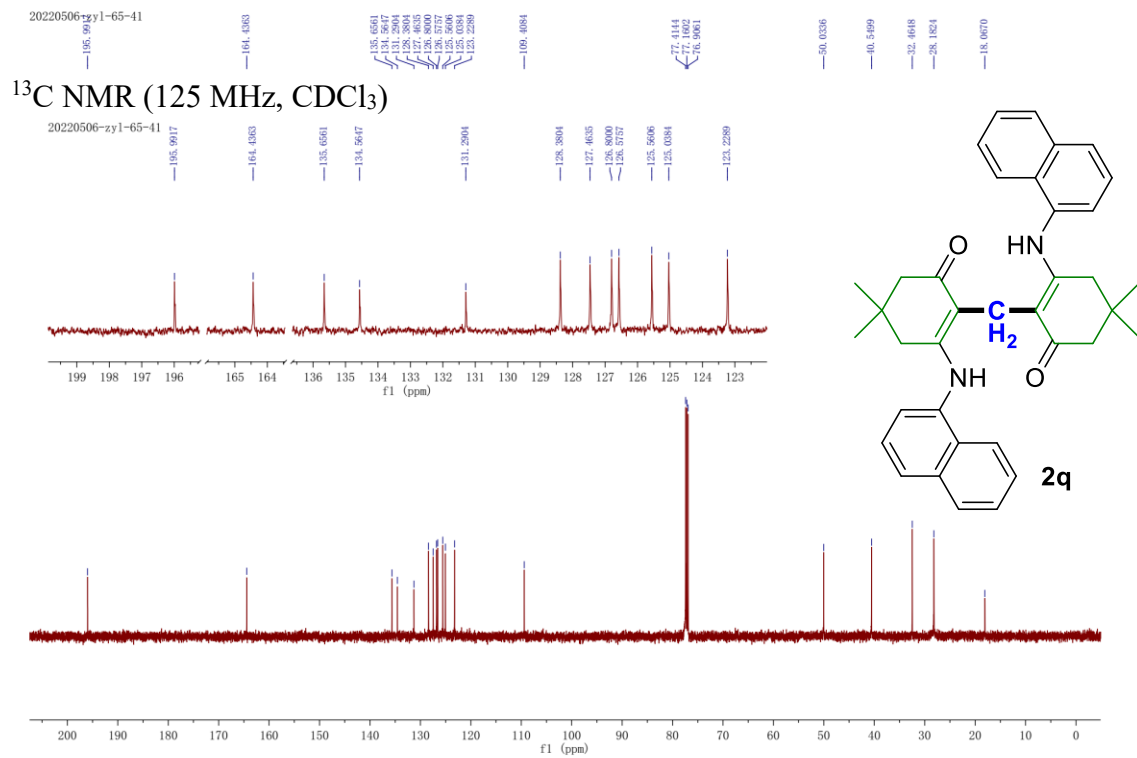

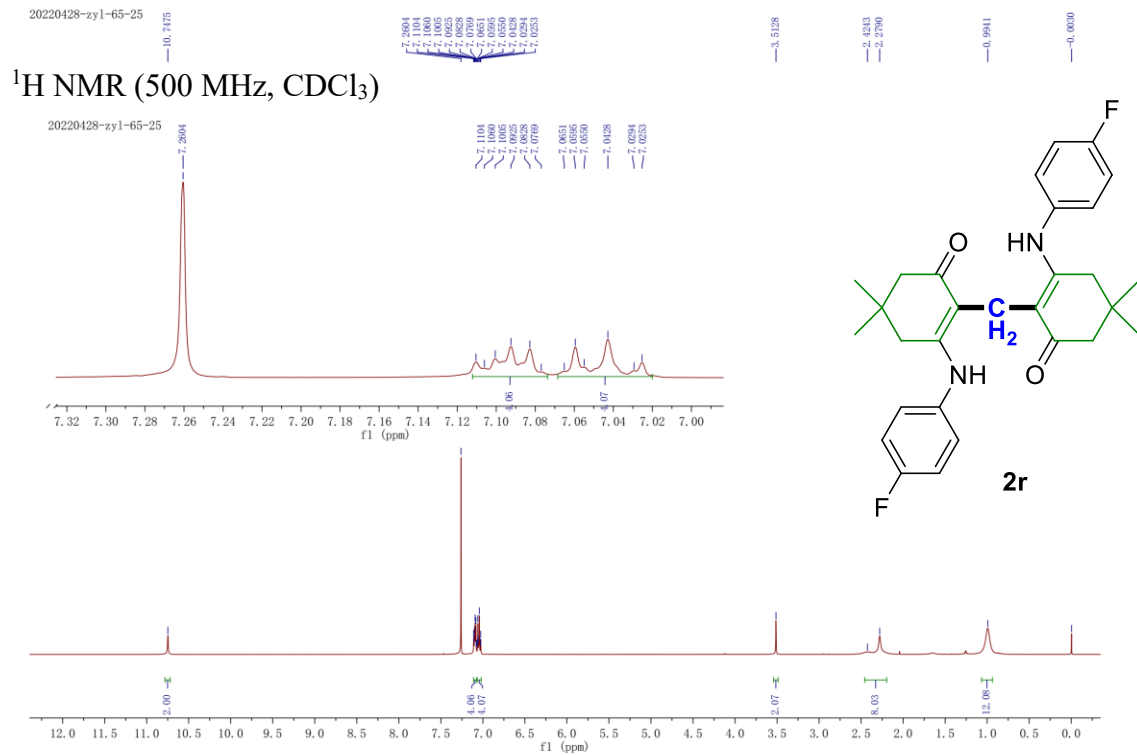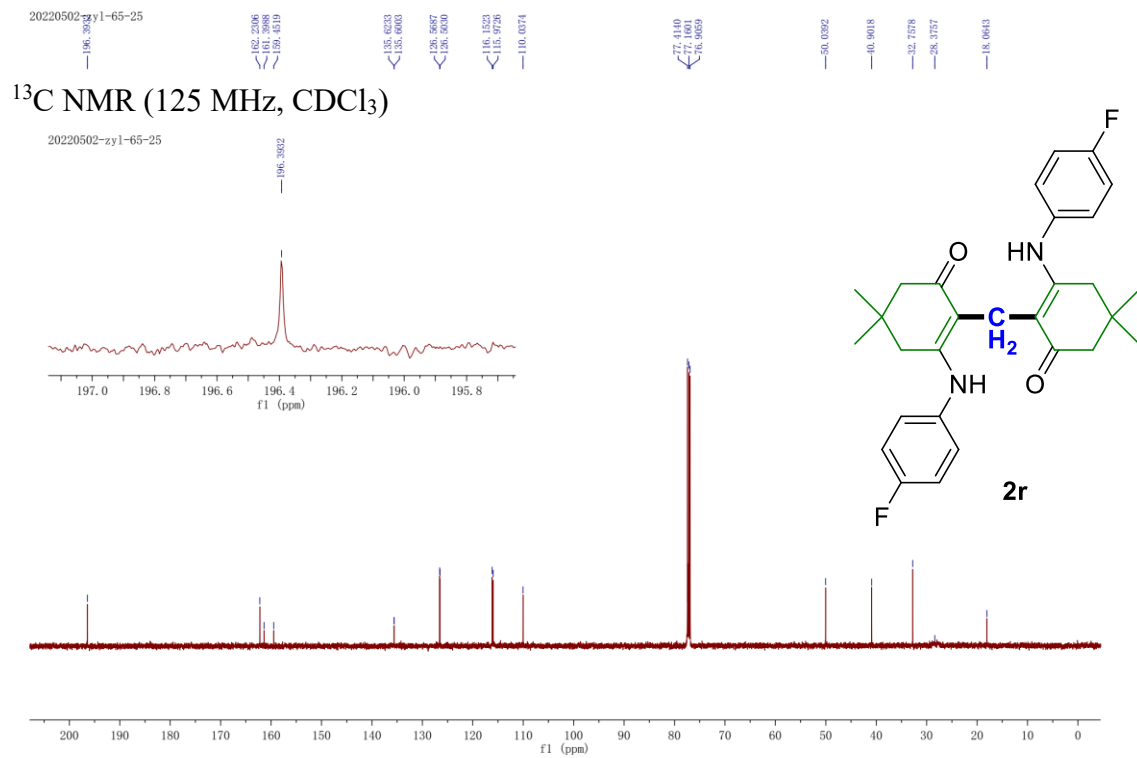

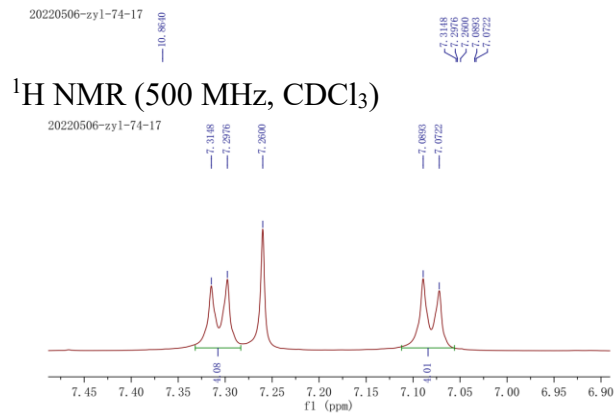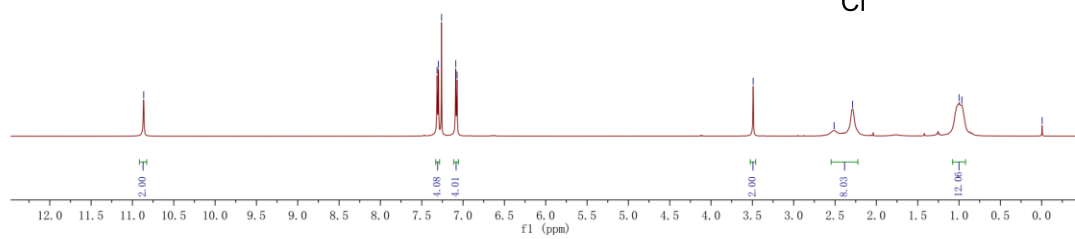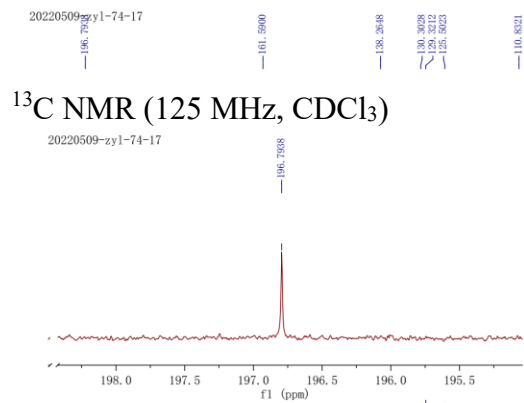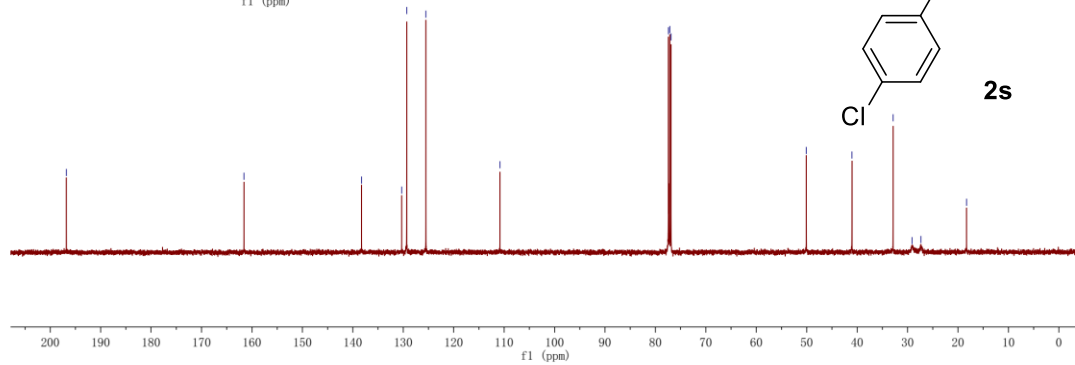

20220428-zy1-65-21

### $^1\text{H}$ NMR (500 MHz, $\text{CDCl}_3$ )

20220428-zy1-65-21

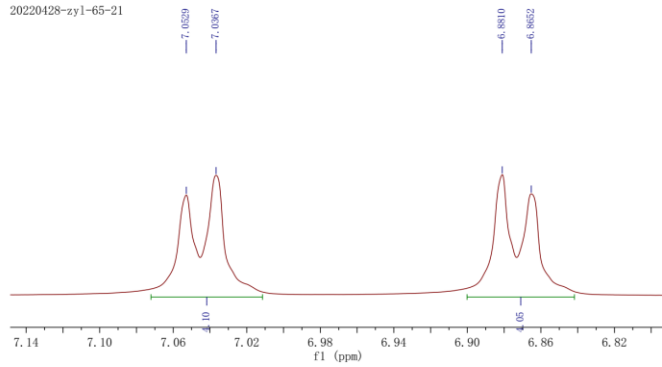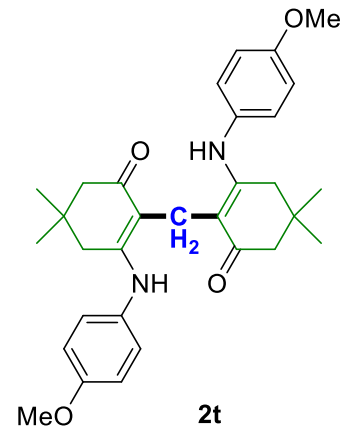

20220502-zy1-65-21

### $^{13}\text{C}$ NMR (125 MHz, $\text{CDCl}_3$ )

20220502-zy1-65-21

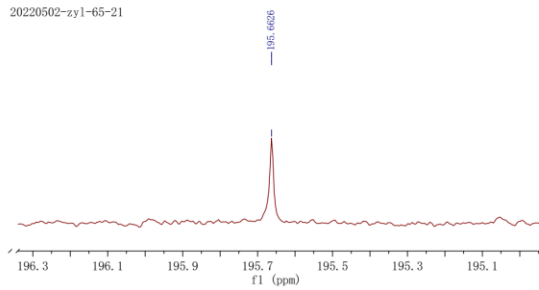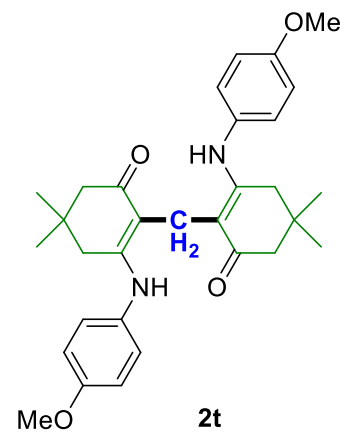

### NMR spectra of compounds 3

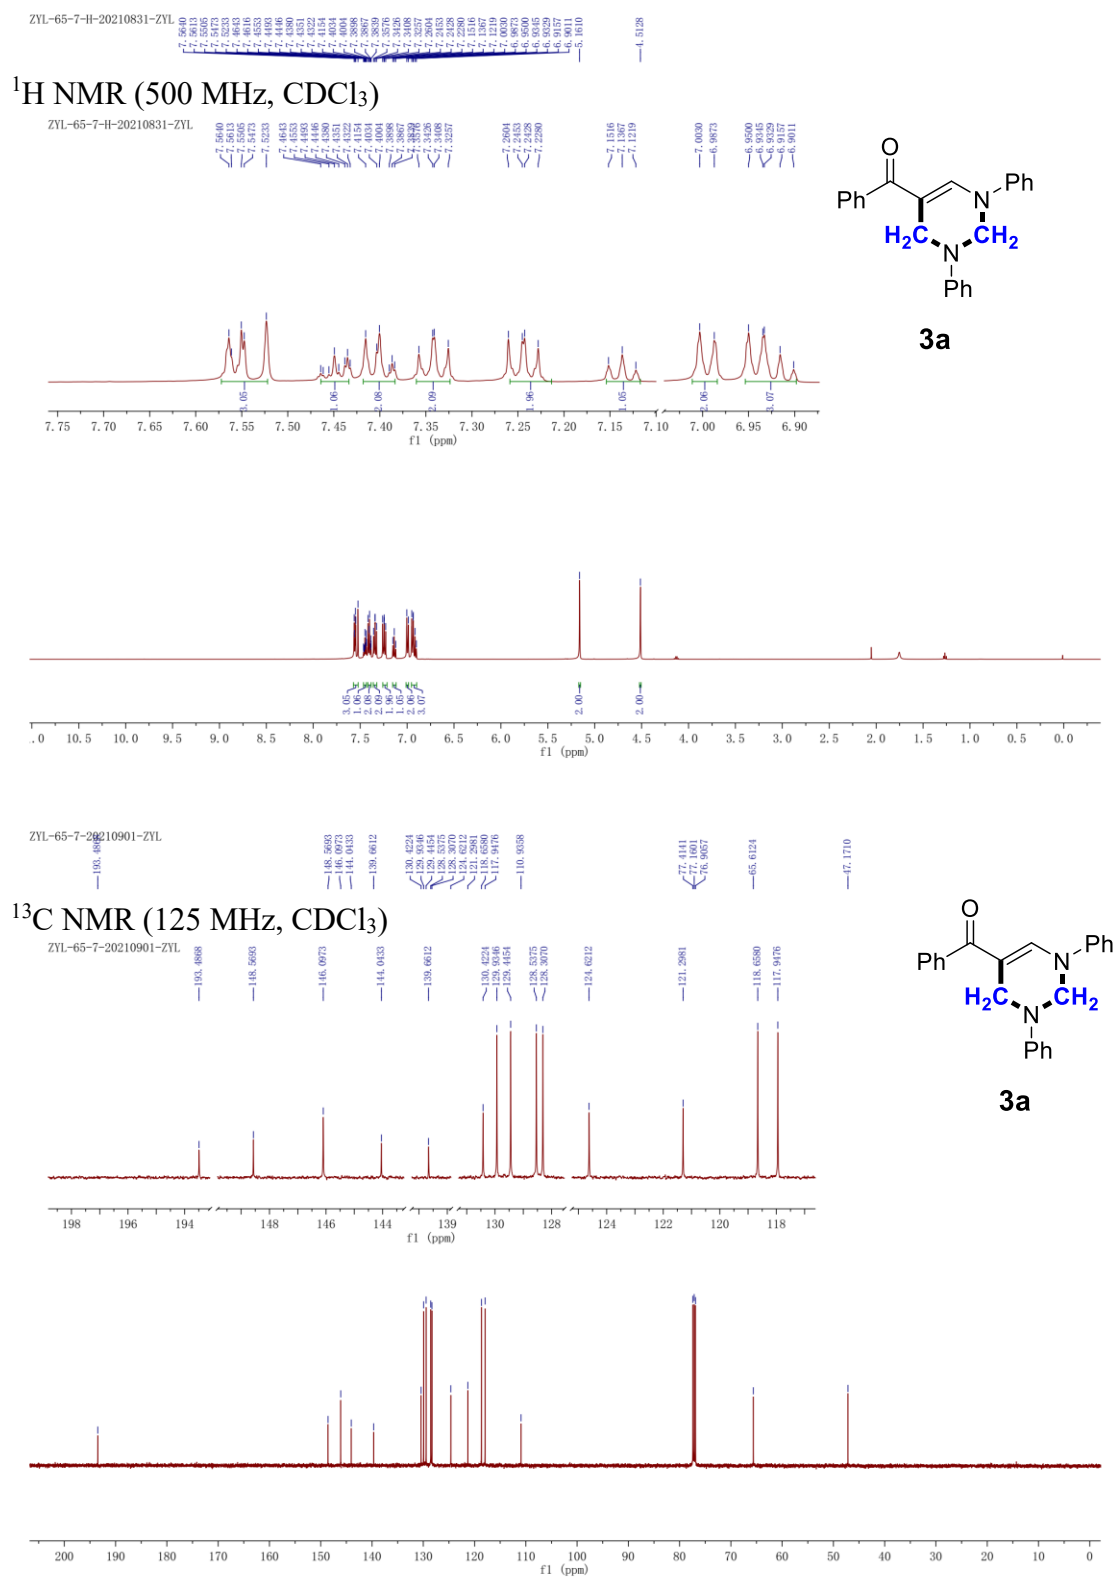

9.8-2-H  
PROTON

<sup>1</sup>H NMR (500 MHz, CDCl<sub>3</sub>)

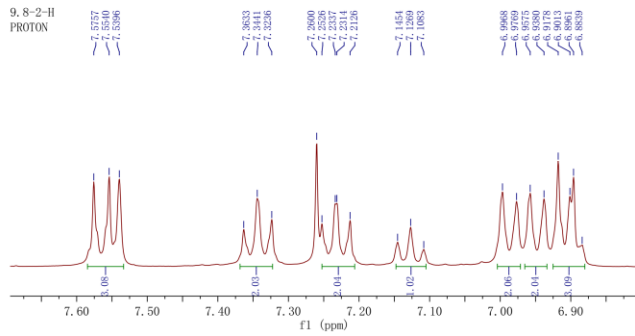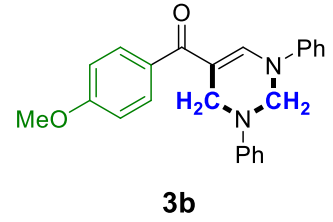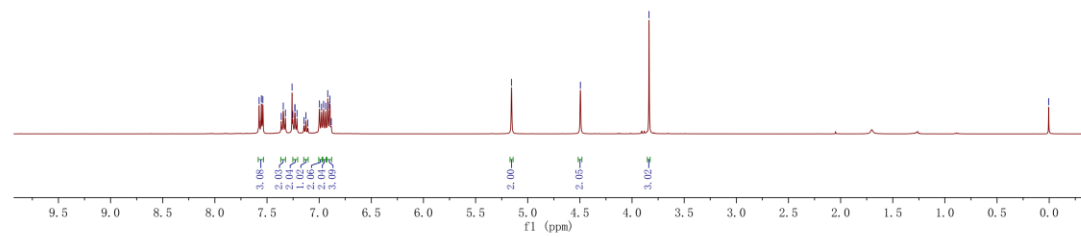

9.8-2-C  
C13CPD

<sup>13</sup>C NMR (125 MHz, CDCl<sub>3</sub>)

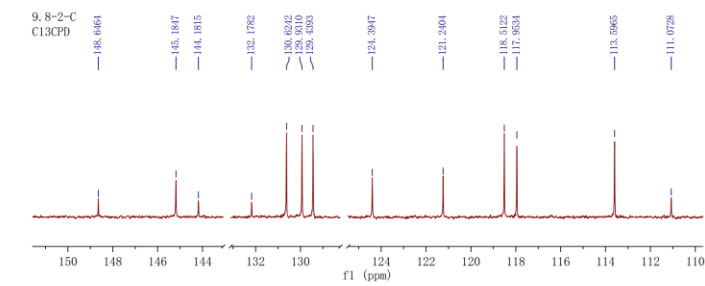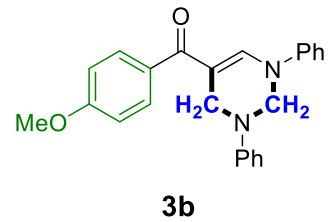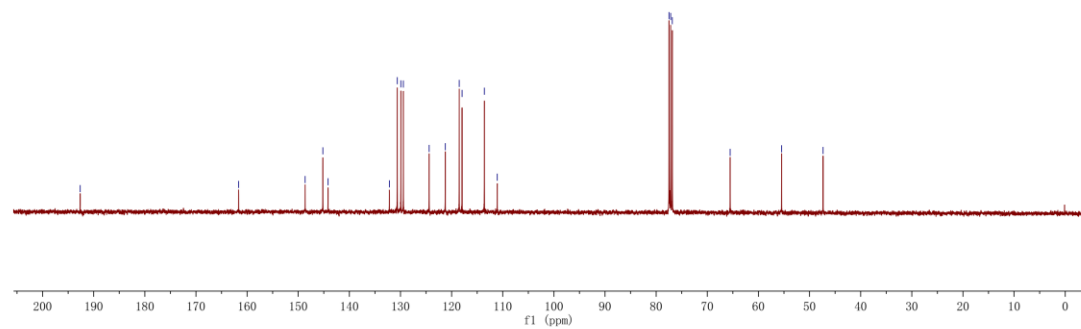

20220524-zyl-74-4

7.5047  
7.4879  
7.4823  
7.3729  
7.3578  
7.3411  
7.3290  
7.2200  
7.1579  
7.1422  
6.9793  
6.9535  
6.9379  
6.9012

-5.1582

-1.4885

-0.0090

### $^1\text{H}$ NMR (500 MHz, $\text{CDCl}_3$ )

20220524-zyl-74-4

7.5047  
7.4879  
7.4823  
7.3729  
7.3578  
7.3411  
7.3290  
7.2200  
7.1579  
7.1422  
6.9793  
6.9535  
6.9379  
6.9012

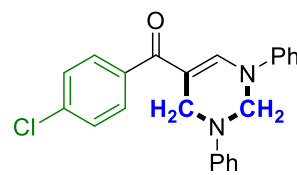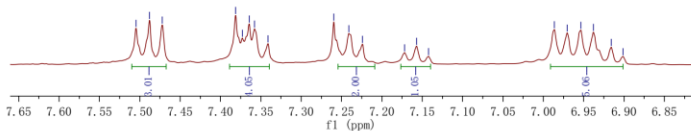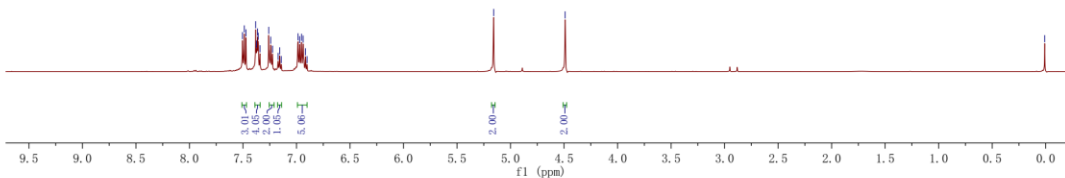

20220525-zyl-74-45

148.5002  
138.5181  
133.9614  
138.0195  
136.6481  
130.0232  
129.9753  
129.9274  
124.8710  
118.7579  
117.9485  
110.8124

77.4337  
77.0054  
76.9054

65.7020

47.1498

### $^{13}\text{C}$ NMR (125 MHz, $\text{CDCl}_3$ )

20220525-zyl-74-45

192.0001  
148.5002  
146.0441  
143.9014  
138.0195  
136.6481  
130.0232  
129.9753  
129.9274  
124.8710  
118.7579  
117.9485  
110.8124

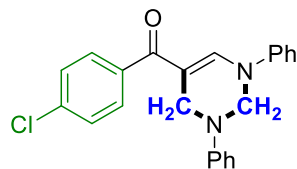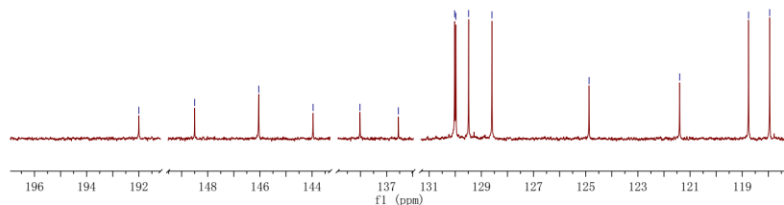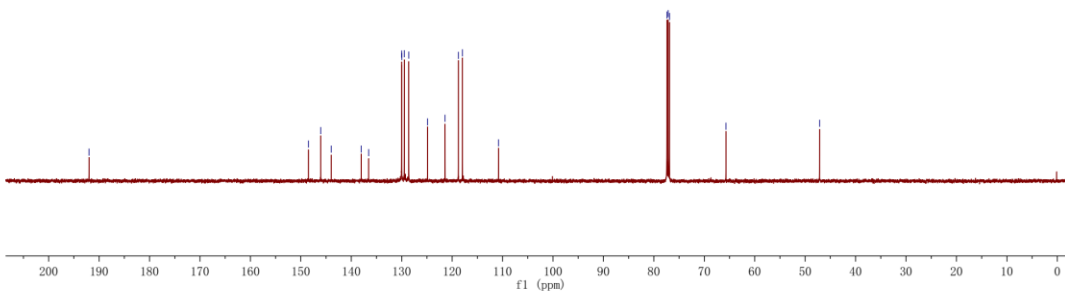



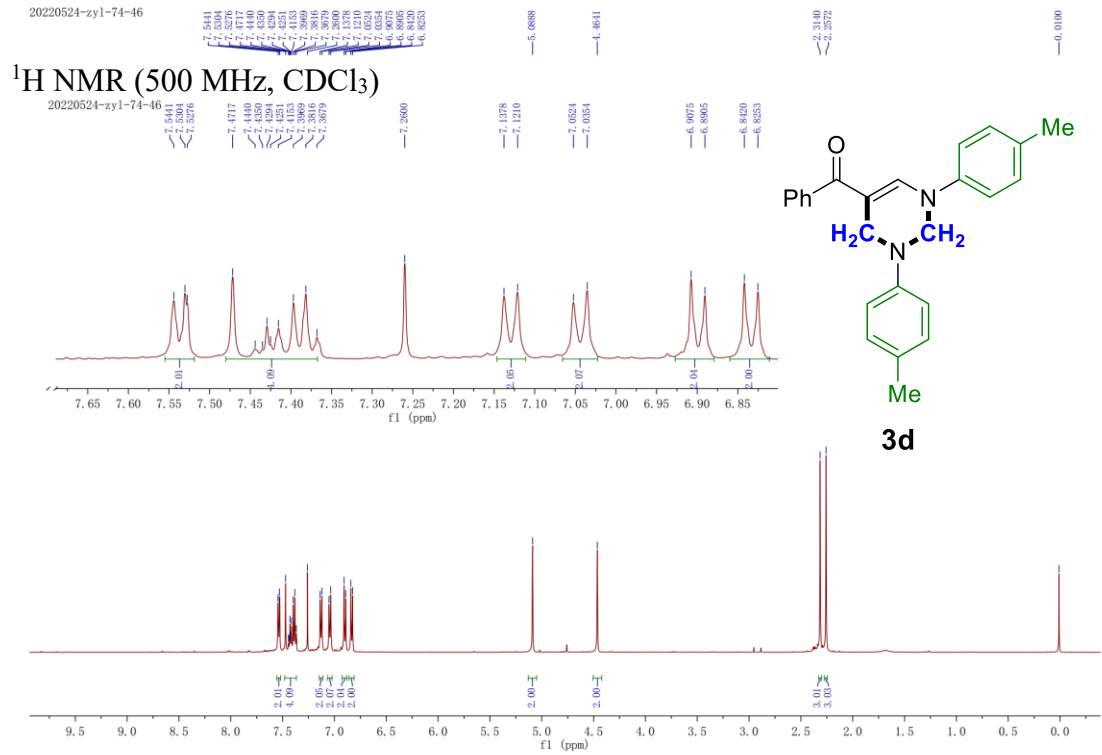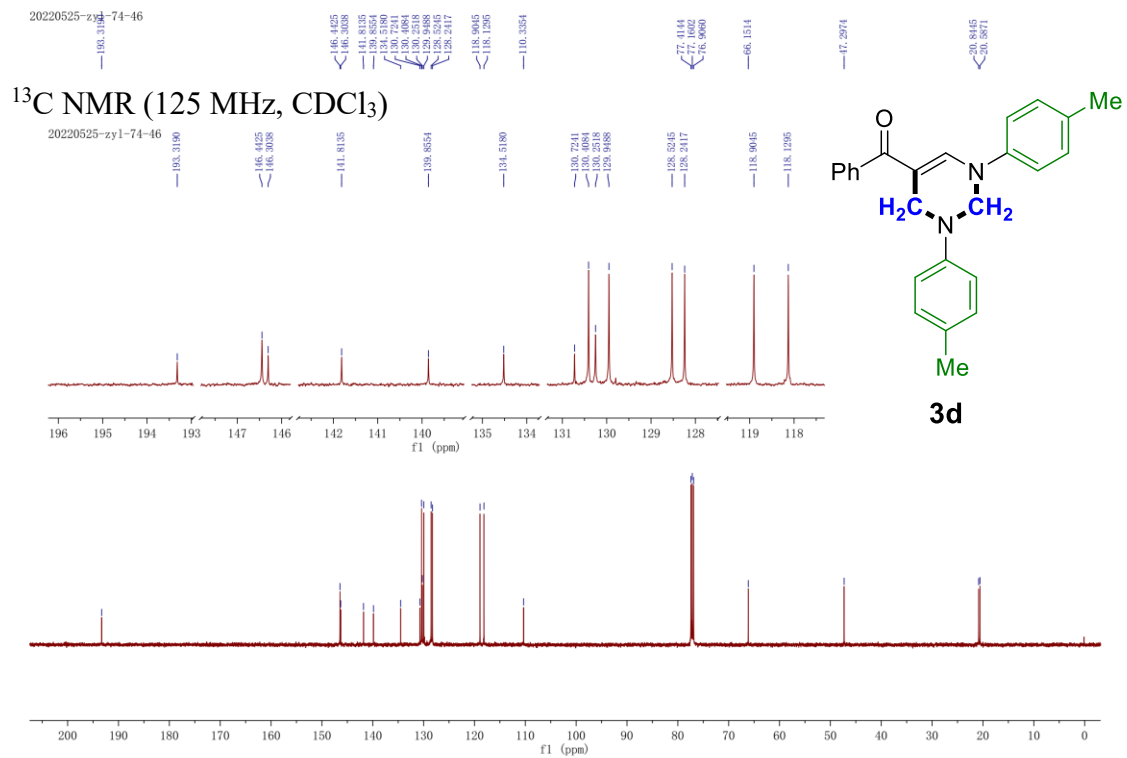

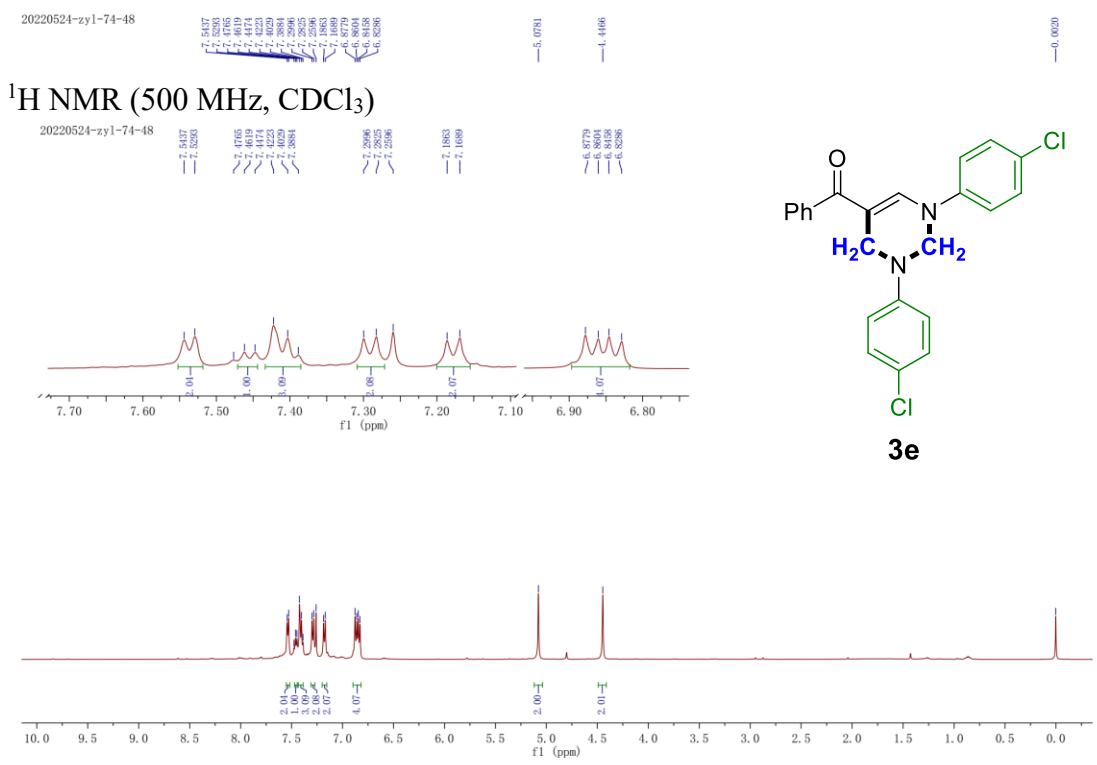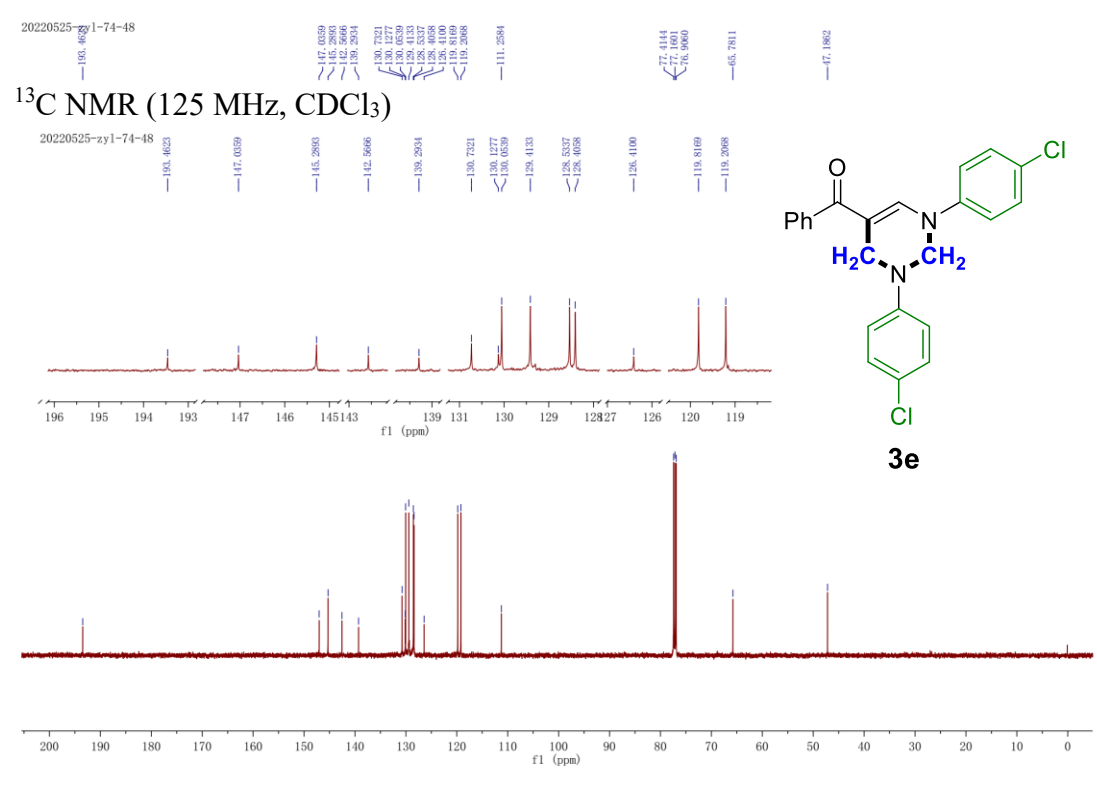

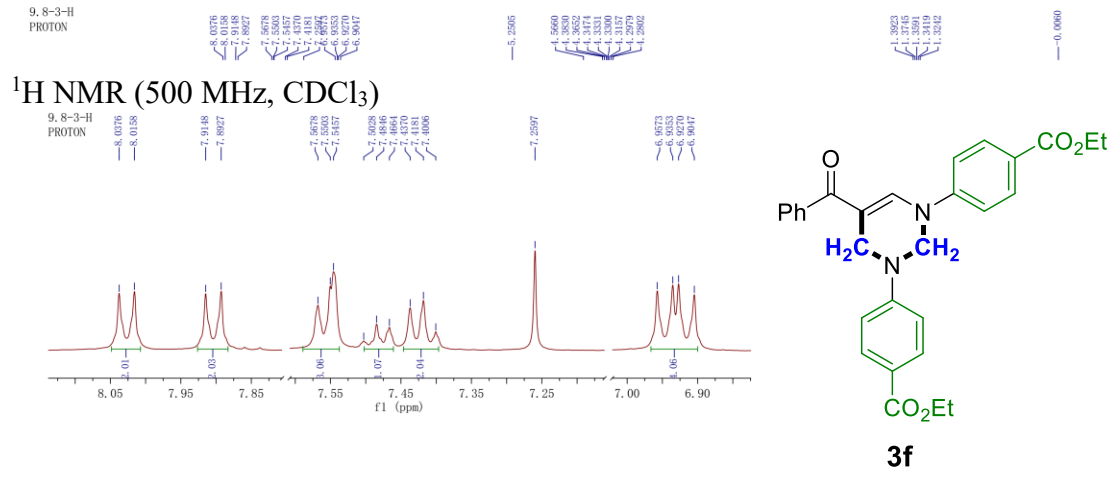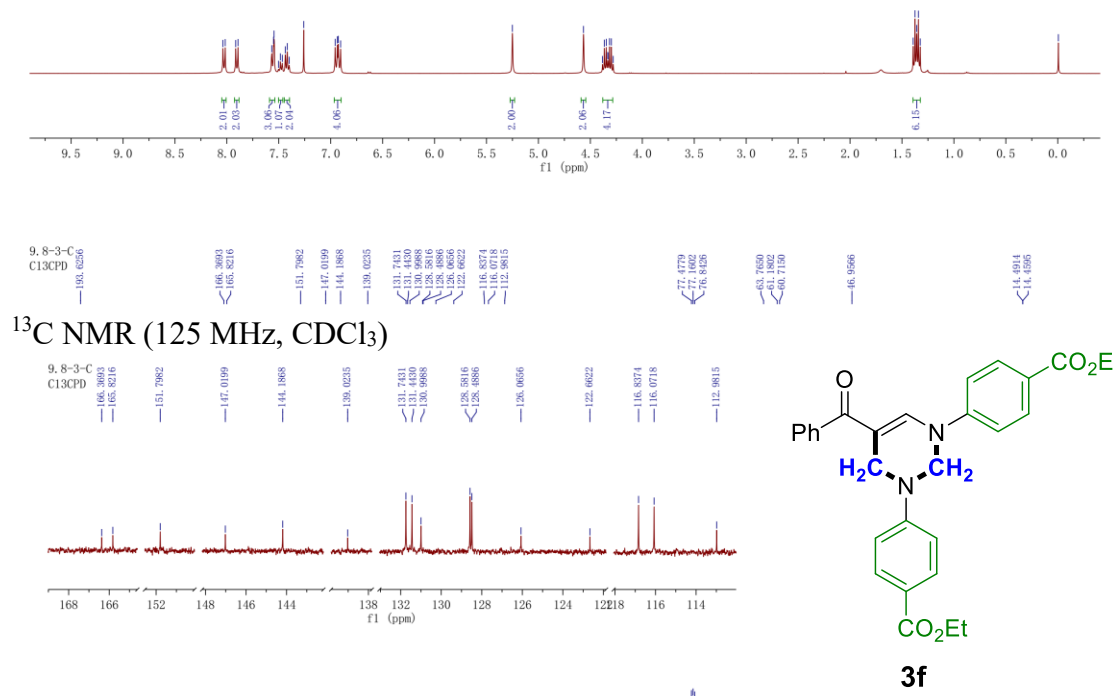

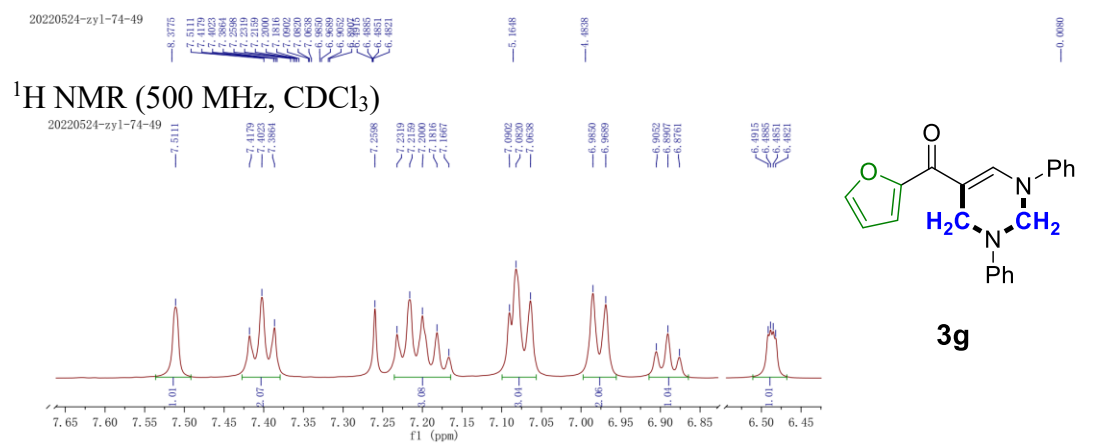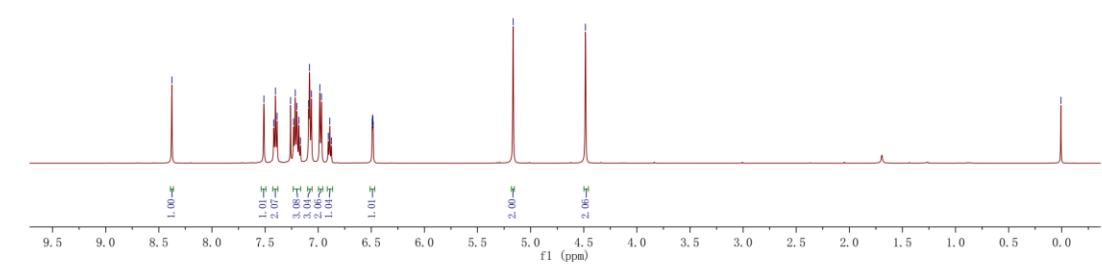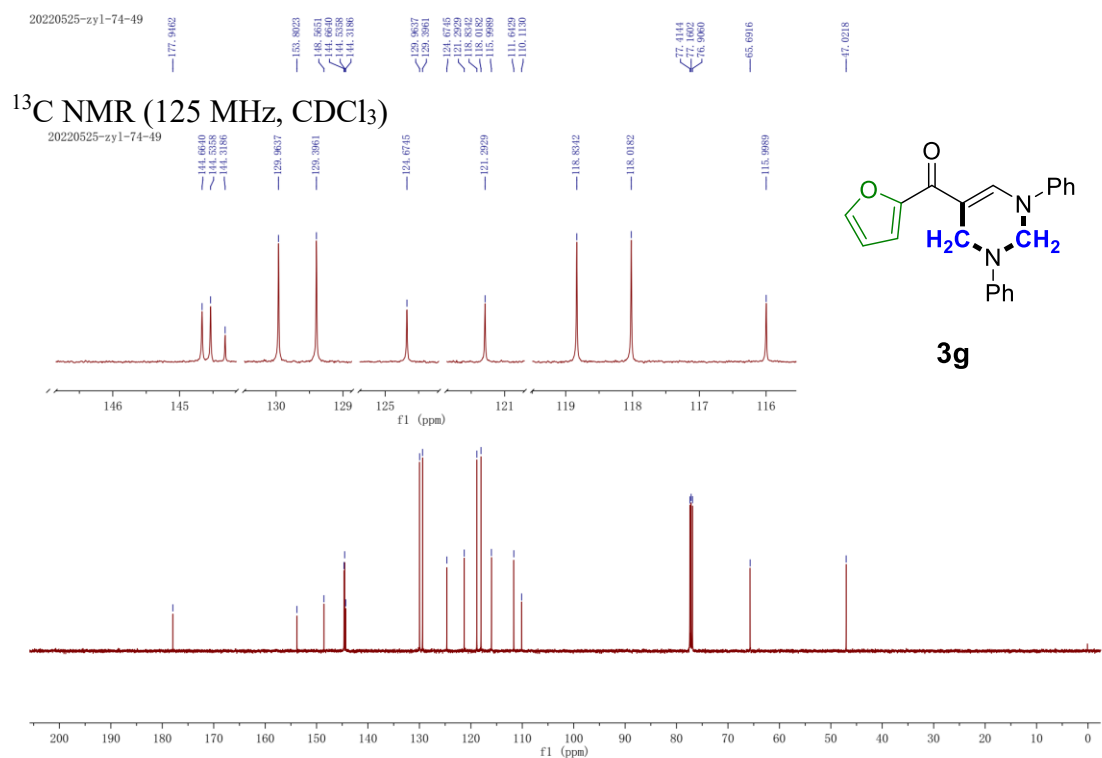

20220602-zy1-74-50

### <sup>1</sup>H NMR (500 MHz, CDCl<sub>3</sub>)

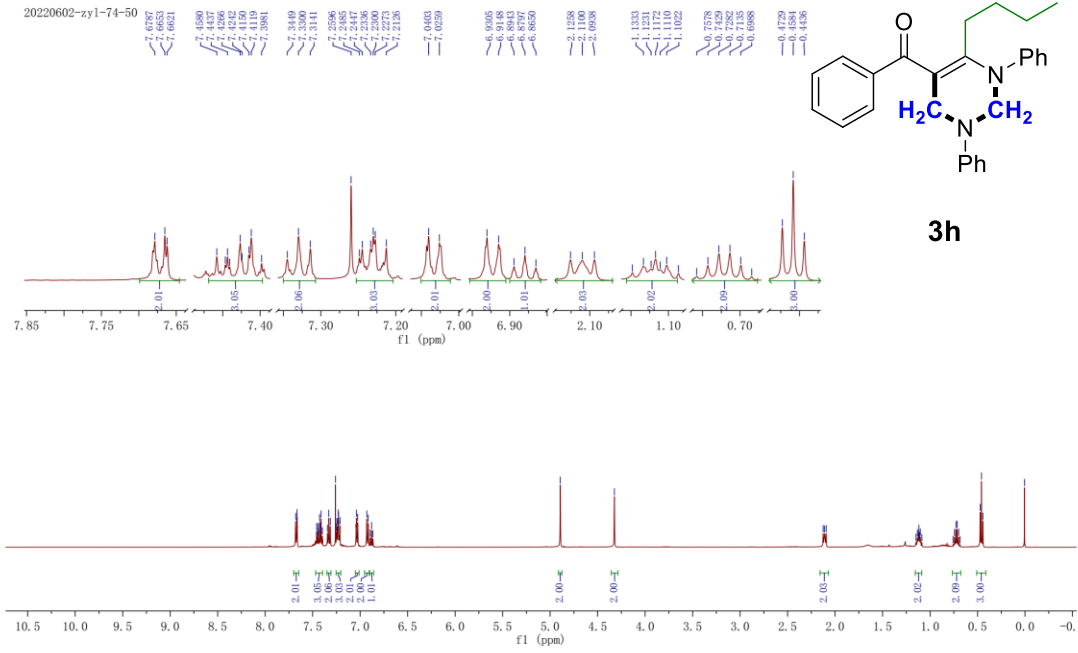

20220606-zy1-74-50

### <sup>13</sup>C NMR (125 MHz, CDCl<sub>3</sub>)

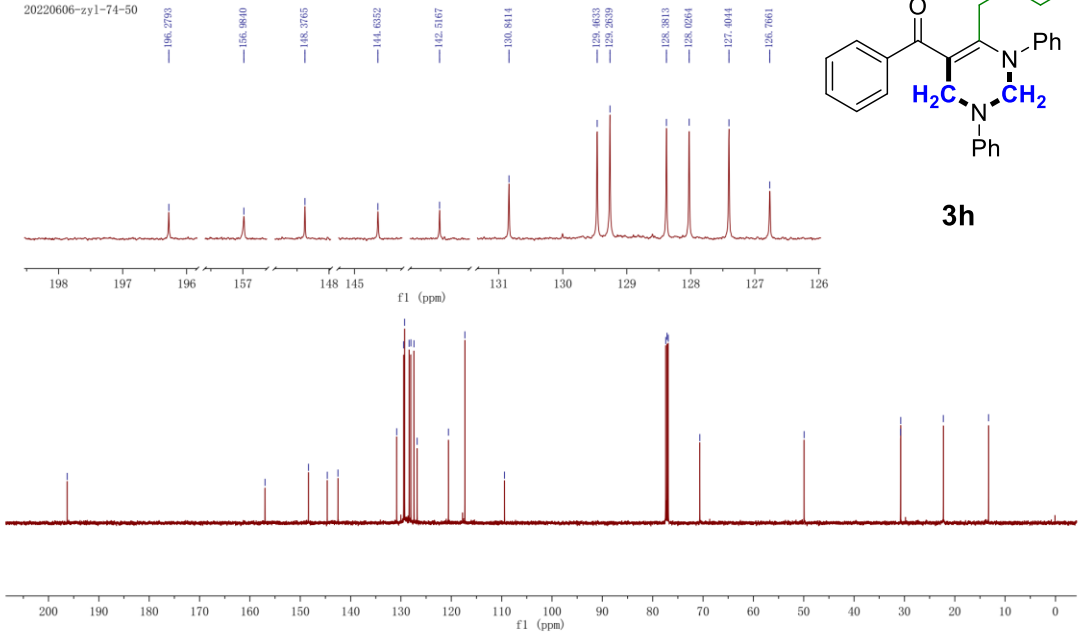

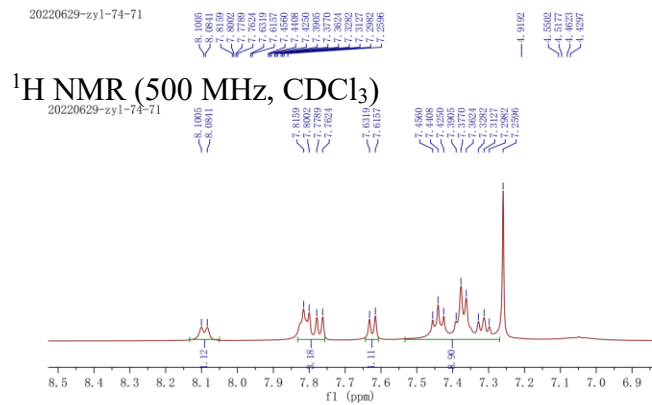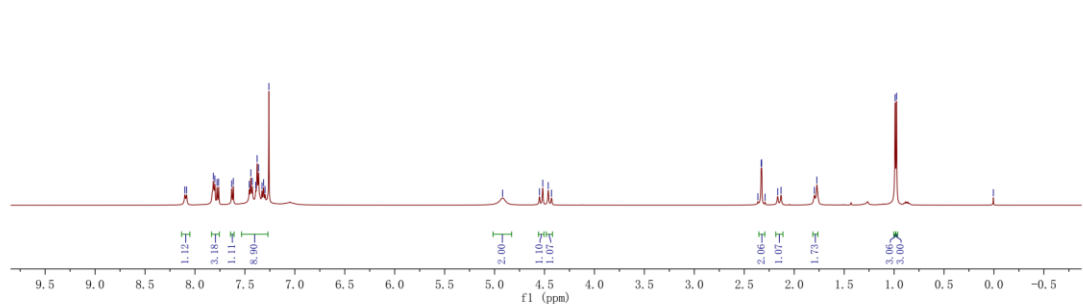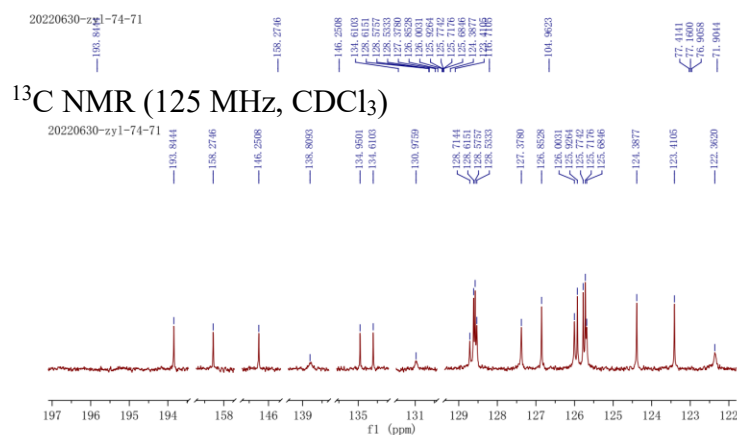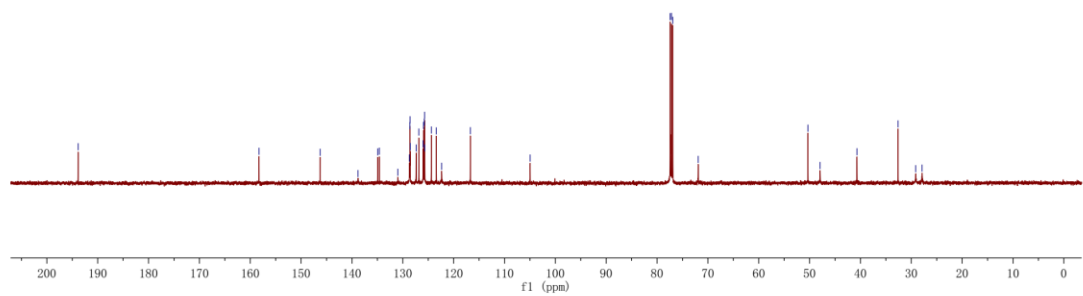

9.10-3-H  
PROTON

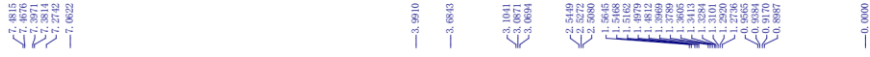

9.10-3-H  
PROTON

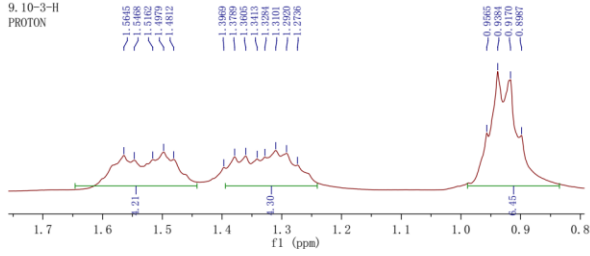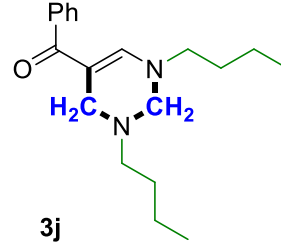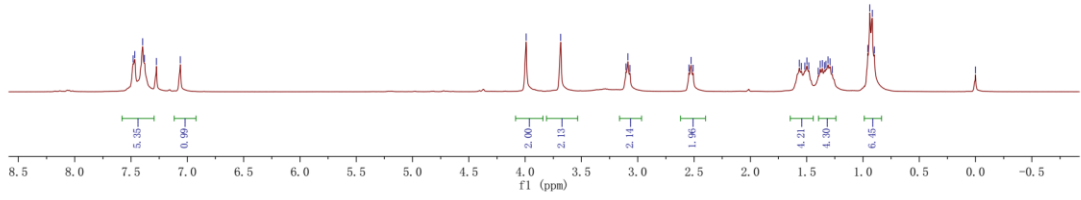

9.10-3-C  
13CPD

9.10-3-C  
13CPD

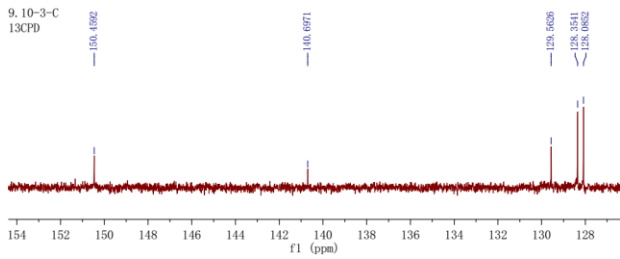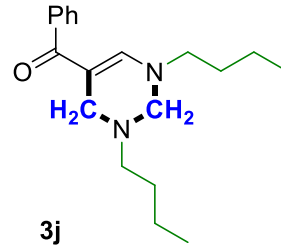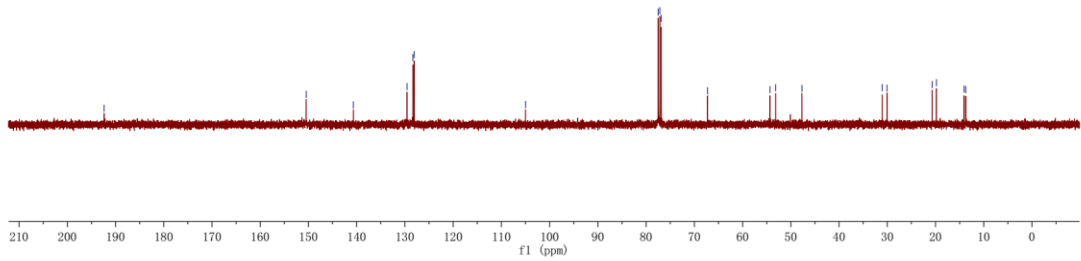

## NMR spectra of compounds 2'

20220601-zy1-74-69

<sup>1</sup>H NMR (500 MHz, CDCl<sub>3</sub>)

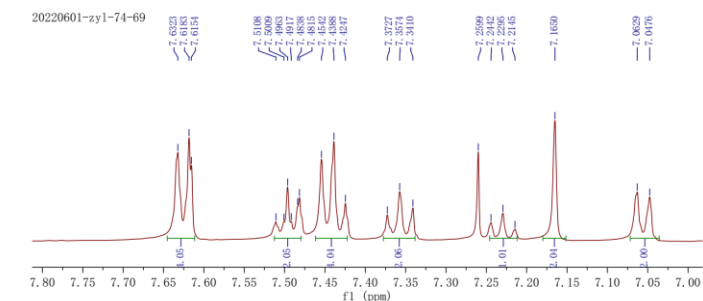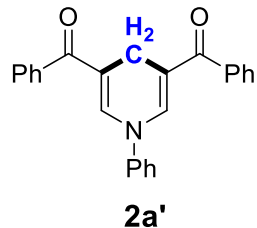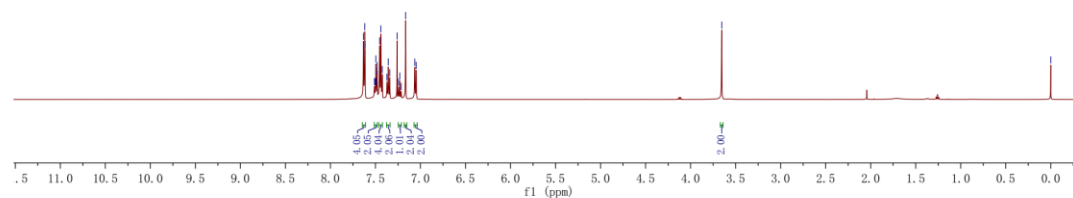

<sup>13</sup>C NMR (125 MHz, CDCl<sub>3</sub>)

20220601-zy1-74-69

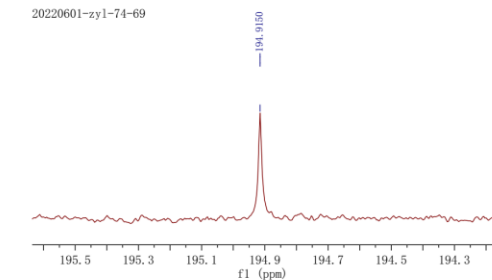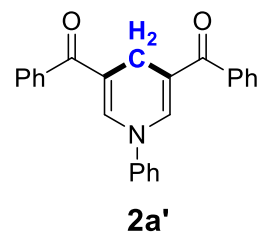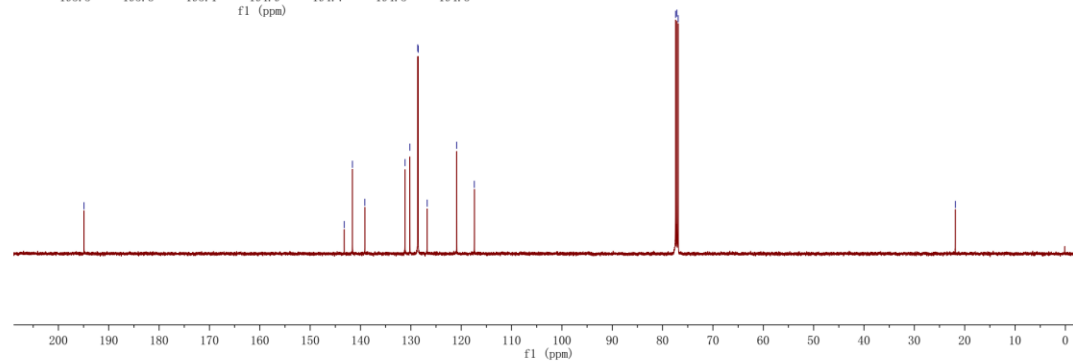



20220704-zy1-74-75

<sup>1</sup>H NMR (500 MHz, CDCl<sub>3</sub>)

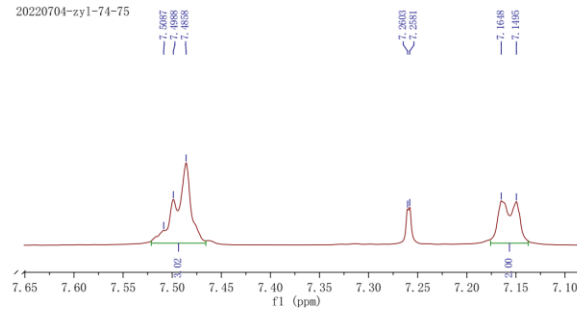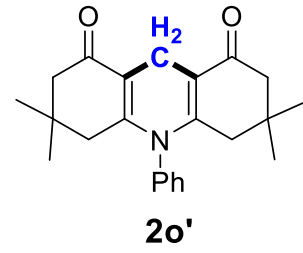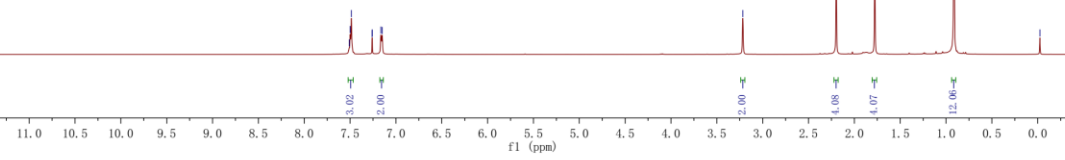

20220704-zy1-74-75

<sup>13</sup>C NMR (125 MHz, CDCl<sub>3</sub>)

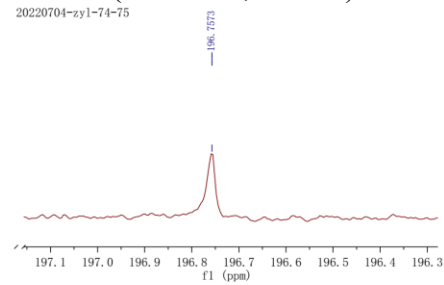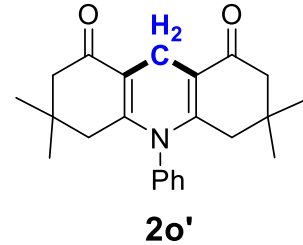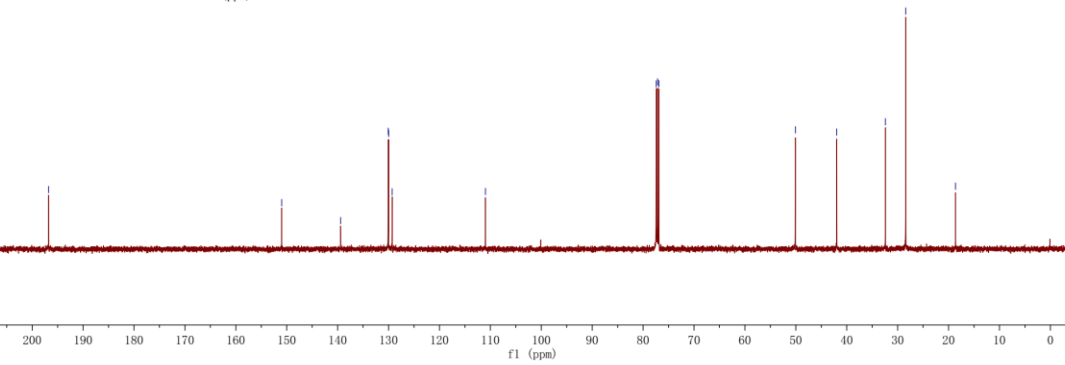

## Cross reaction result

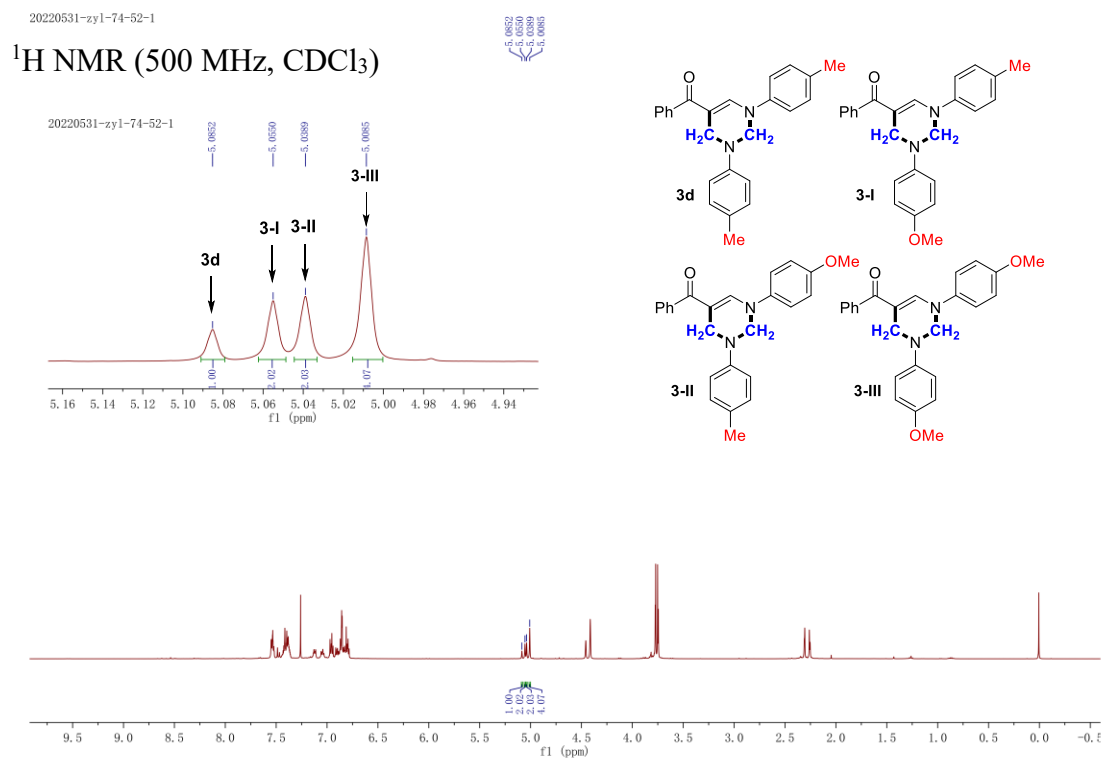

The above ratio is derived from a comparison of spectra of known compounds.<sup>11</sup>
